# Supplementary material for: Copper(ii)-catalyzed synthesis of multisubstituted indoles through sequential Chan–Lam and cross-dehydrogenative coupling reactions
Source: Royal Society of Chemistry journal article supplement (doi:10.1039/d0ra04592f), 2020-01-01

## **Copper( II )-Catalyzed Synthesis of Multisubstituted Indoles through Sequential Chan-Lam and Cross-dehydrogenative Coupling Reactions**

Xin Chen,<sup>a,b</sup> Yunyun Bian,<sup>a</sup> Baichuan Mo,<sup>a,b</sup> Peng Sun,<sup>a,b</sup> Chunxia Chen,<sup>\*a,b</sup> Jinsong Peng<sup>\*a</sup>

<sup>a</sup> College of Chemistry, Chemical Engineering and Resource Utilization, Northeast Forestry University, No. 26 Hexing Road, Harbin, 150040, P. R. China.

<sup>b</sup> Material Science and Engineering College, Northeast Forestry University, No. 26 Hexing Road, Harbin, 150040, P. R. China.

E-mail: ccx1759@163.com, jspeng1998@nefu.edu.cn

### **Content**

|                                                                             |      |
|-----------------------------------------------------------------------------|------|
| 1. <sup>1</sup> H NMR and <sup>13</sup> C NMR spectra of the products ..... | S-2  |
| 2. High-resolution mass spectra of new compounds.....                       | S-51 |
| 3. IR spectra of new compounds.....                                         | S-61 |

### Ethyl 2-Phenyl-1*H*-indole-3-carboxylate (3aa)

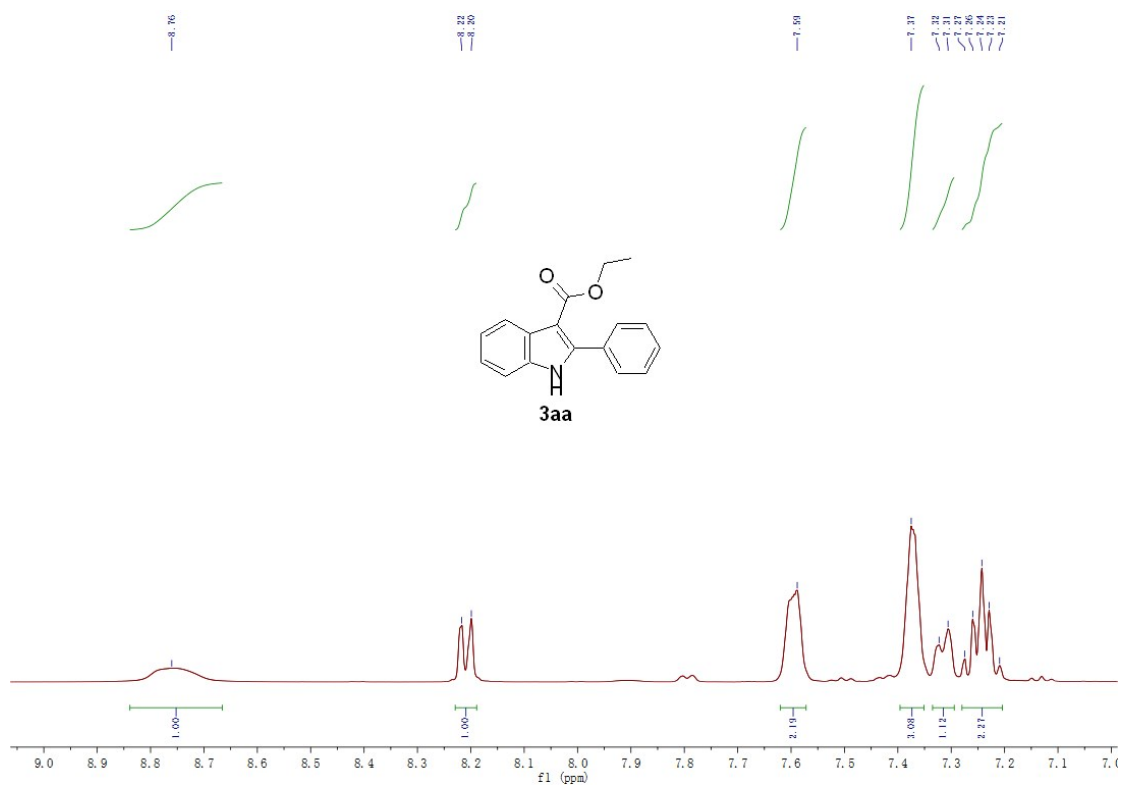

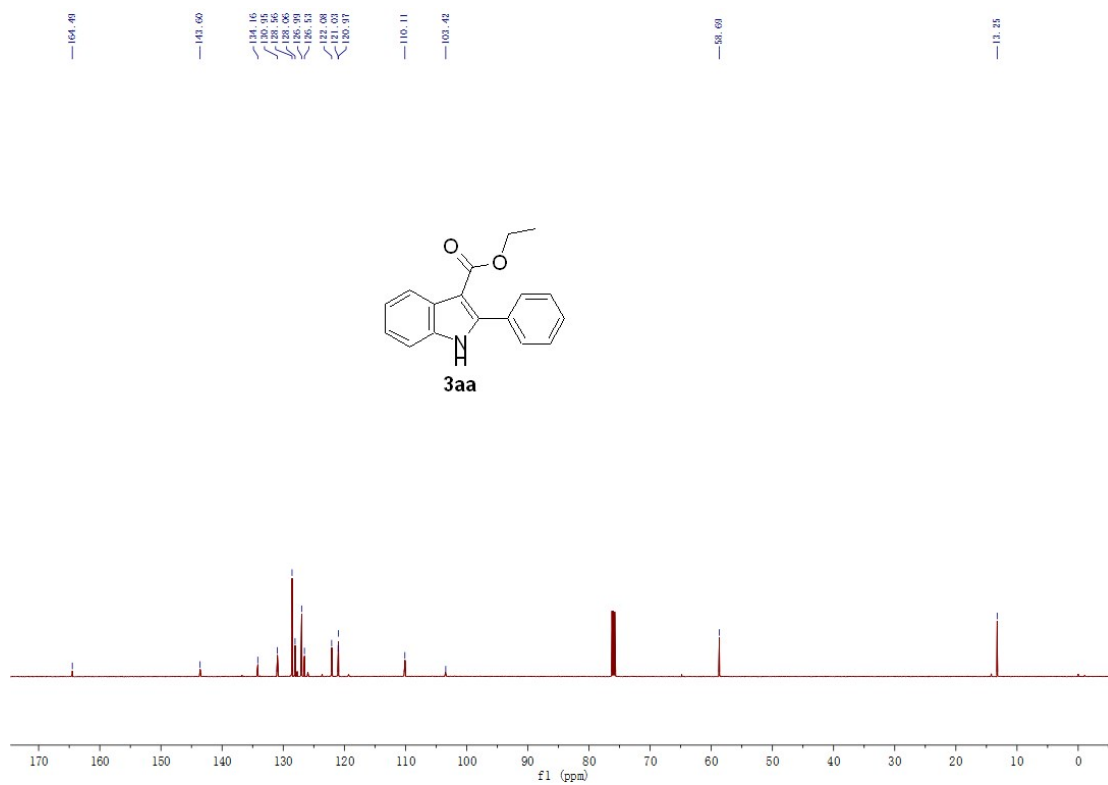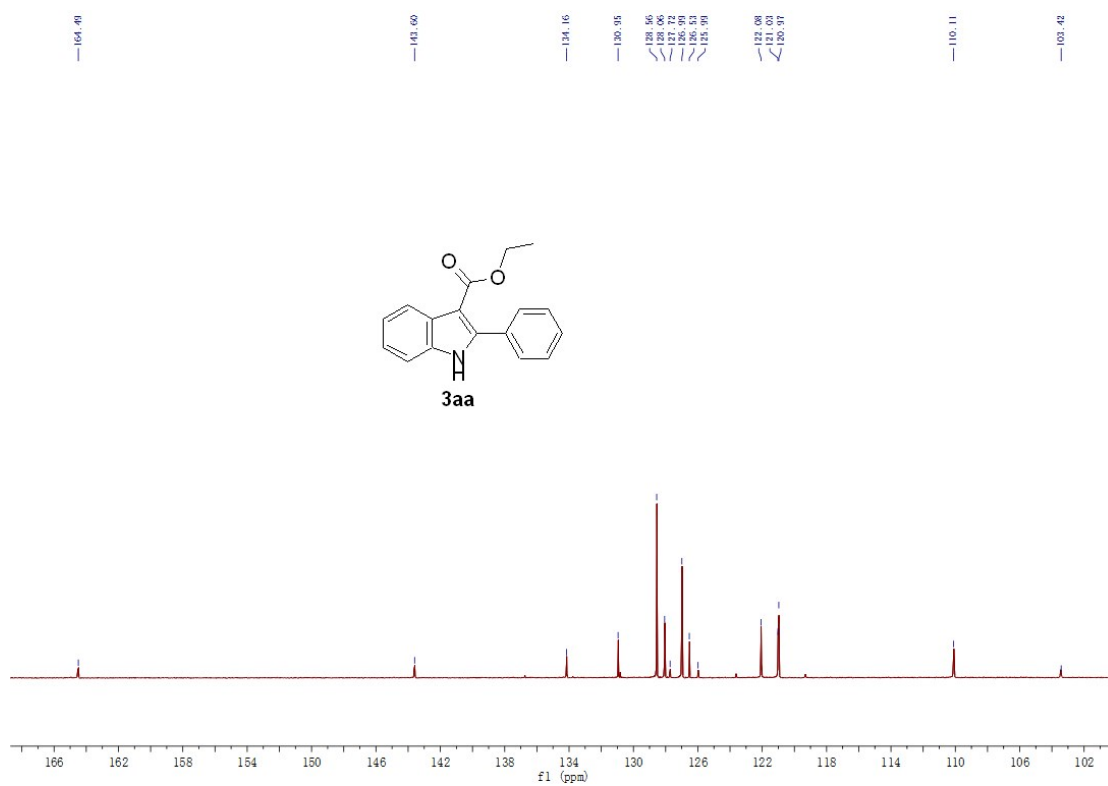

**Methyl 5-chloro-2-(4-chlorophenyl)-1H-indole-3-carboxylate (3ab)**

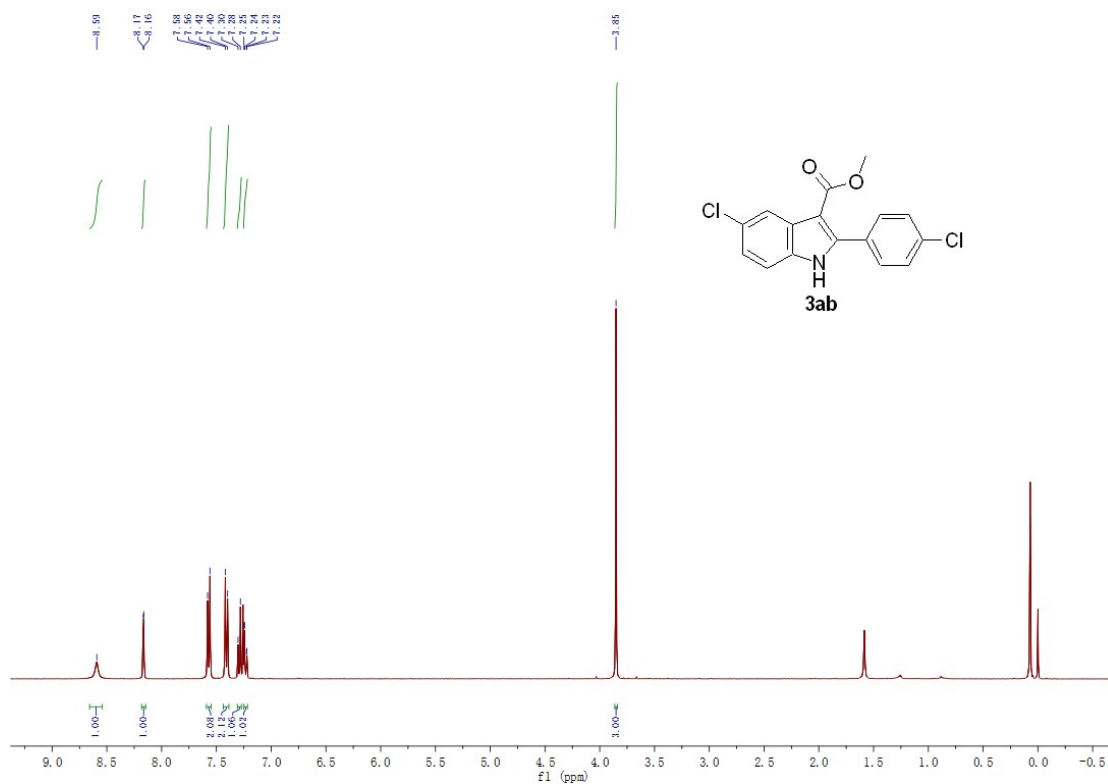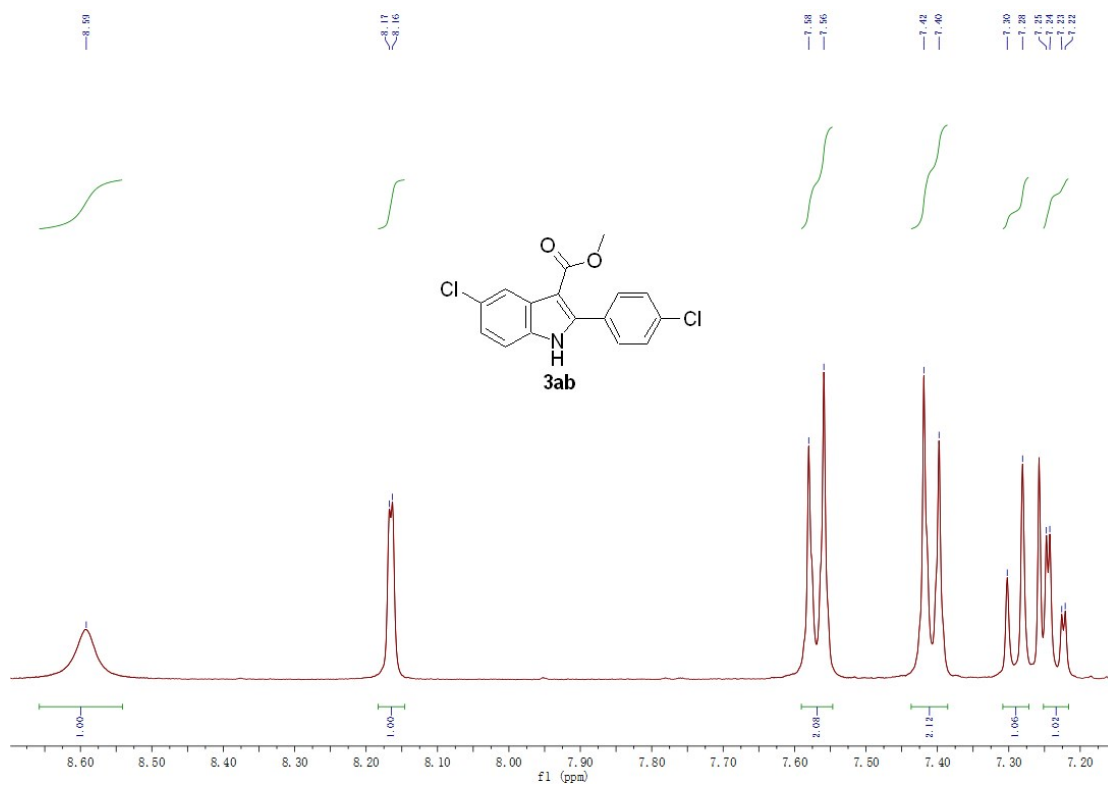

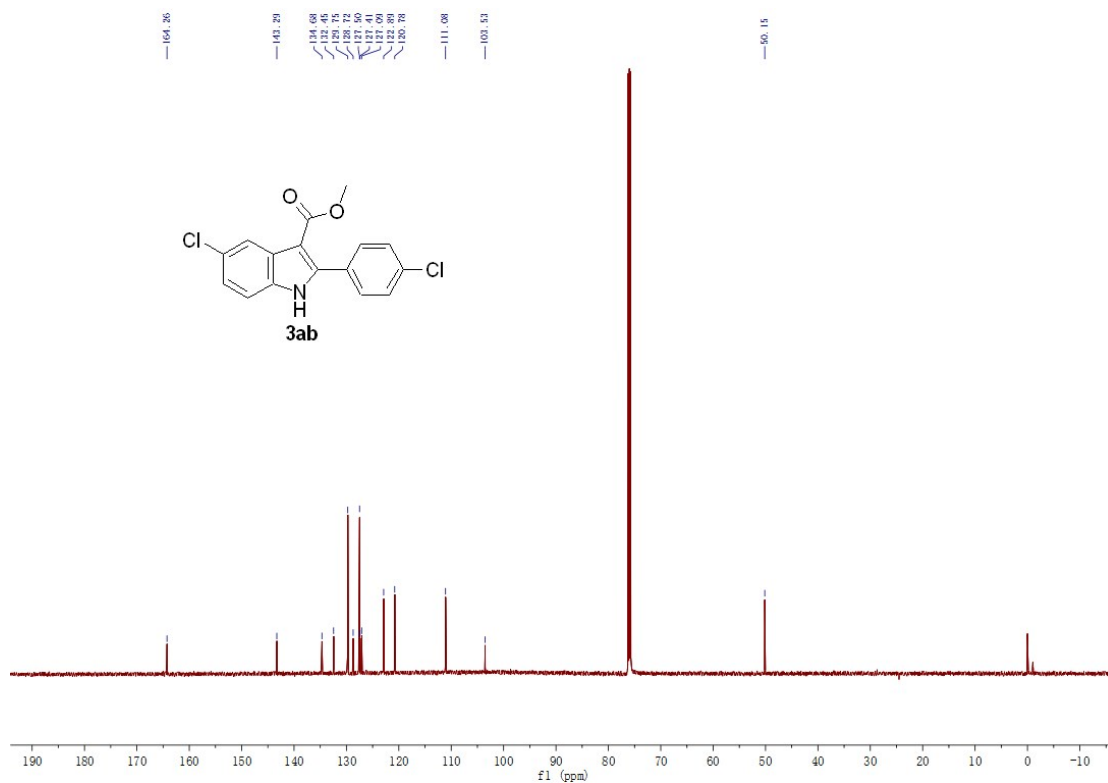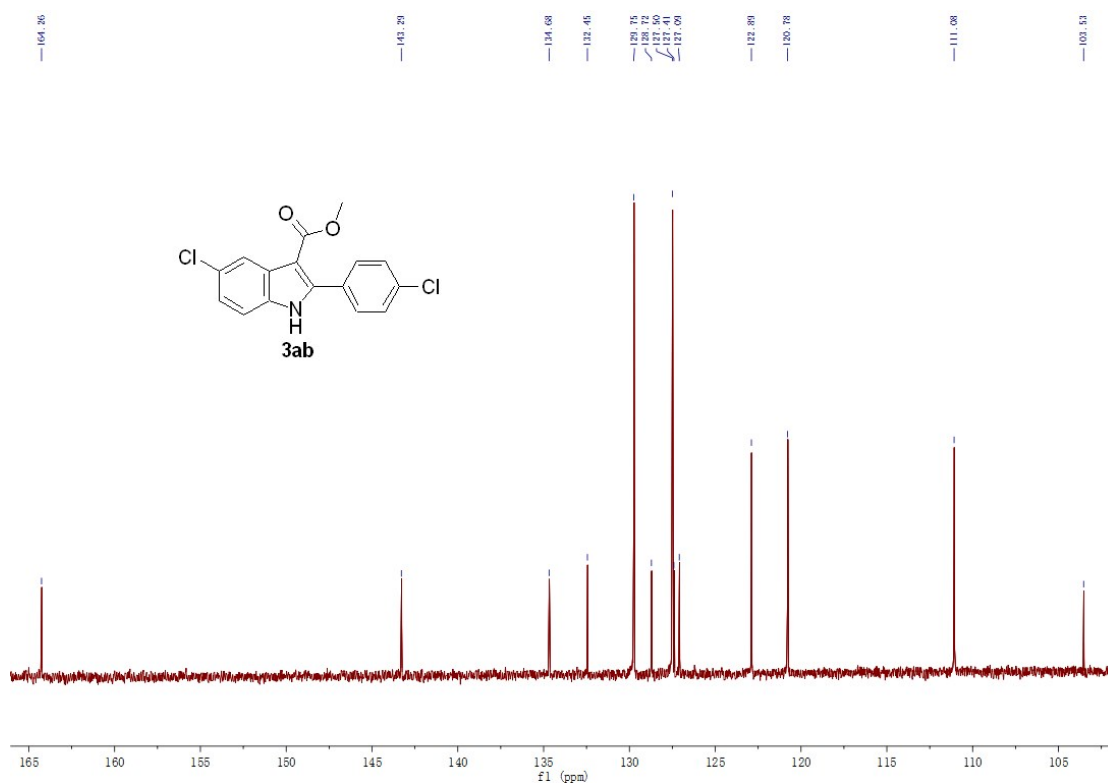

Ethyl 5-chloro-2-(4-fluorophenyl)-1H-indole-3-carboxylate (**3ac**)

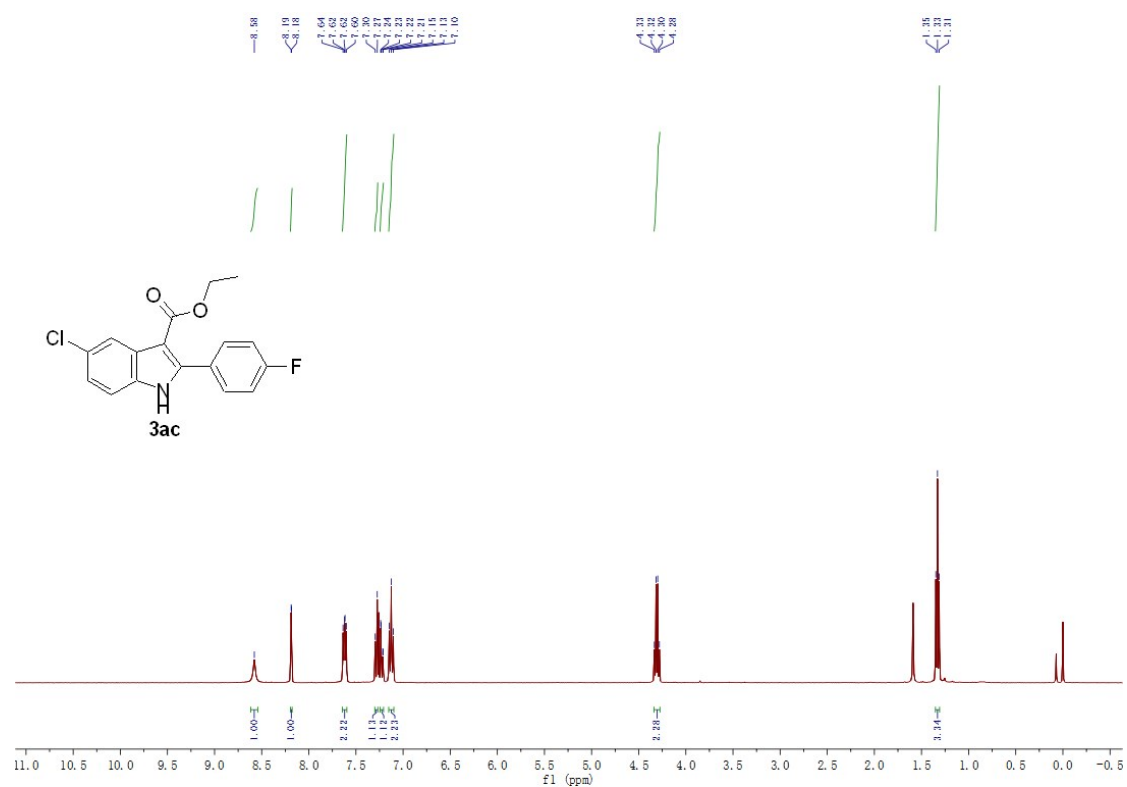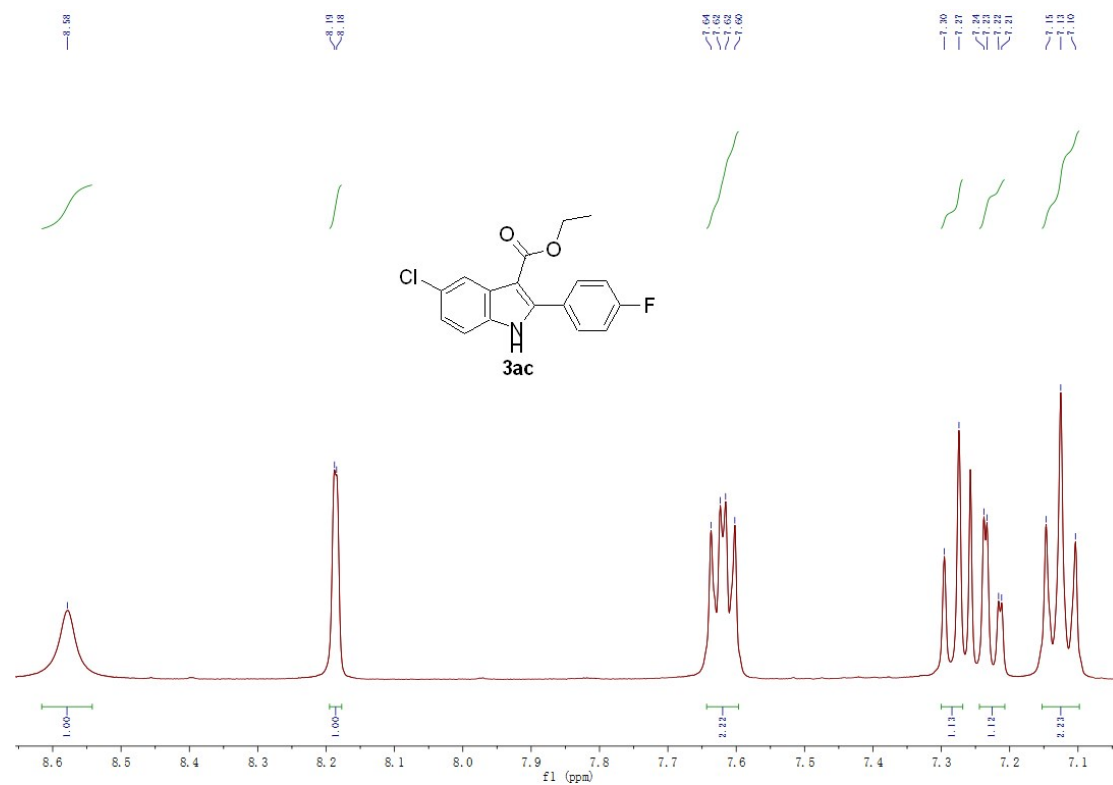

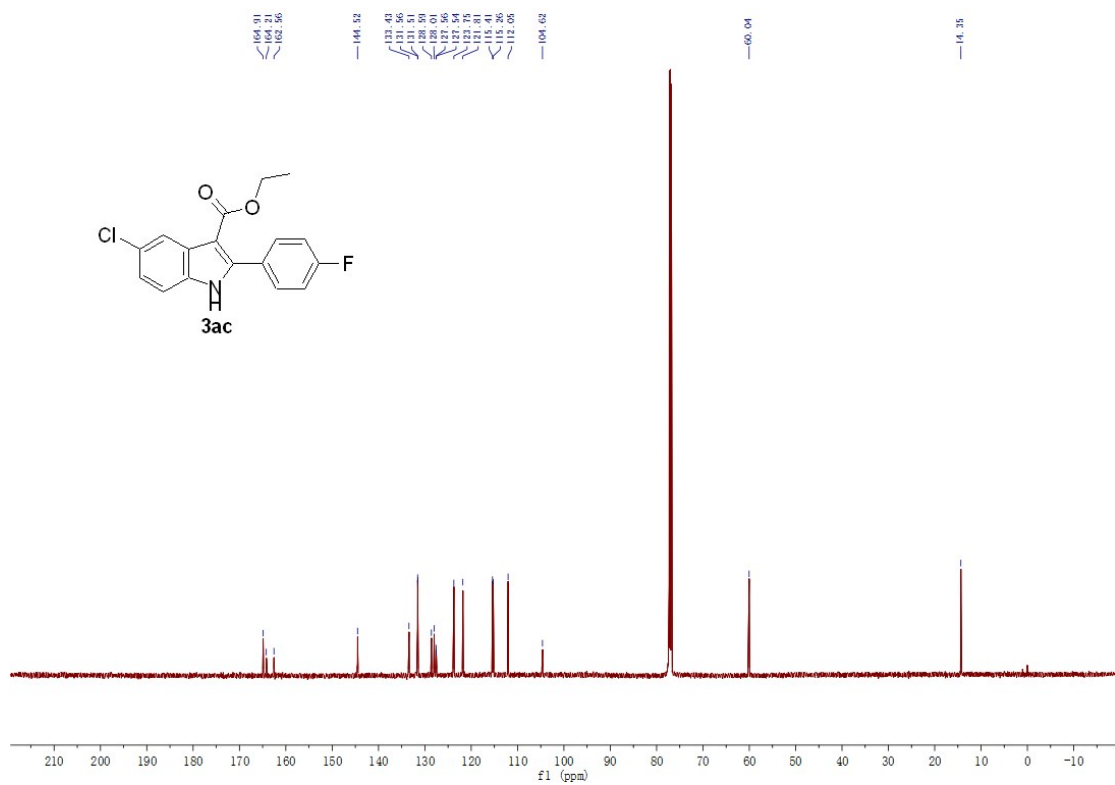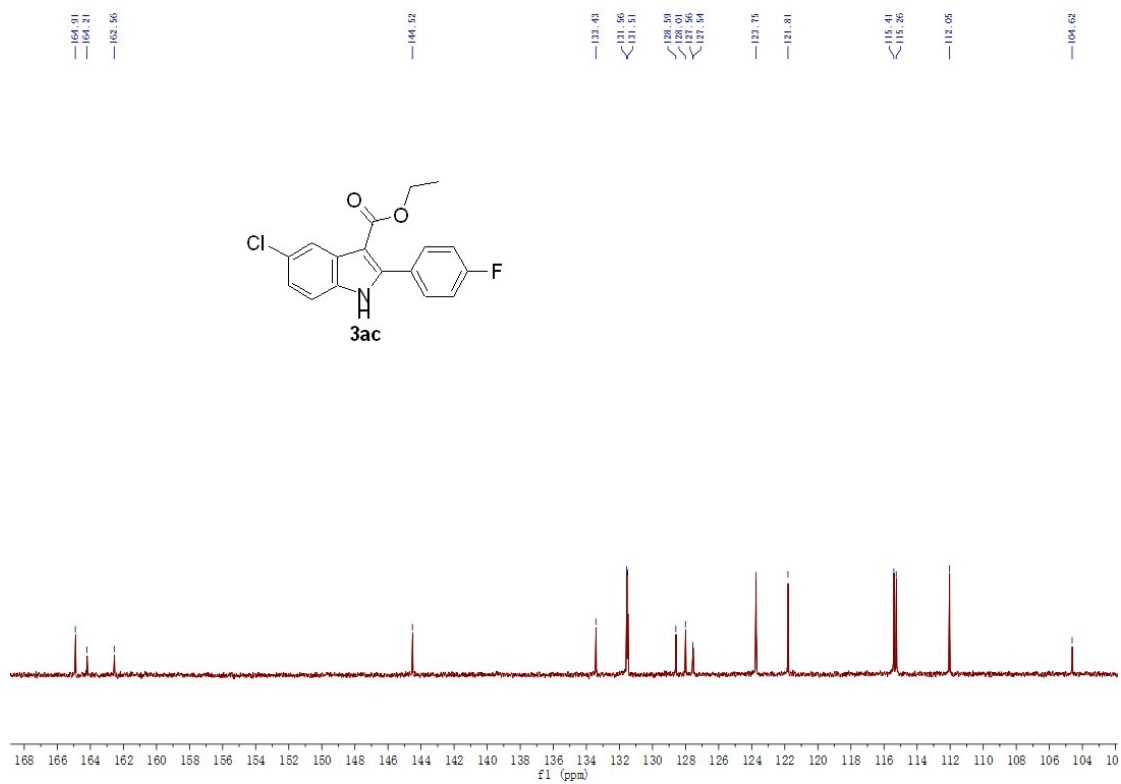

# **Methyl 2-(4-bromophenyl)-5-methyl-1H-indole-3-carboxylate (3ad)**

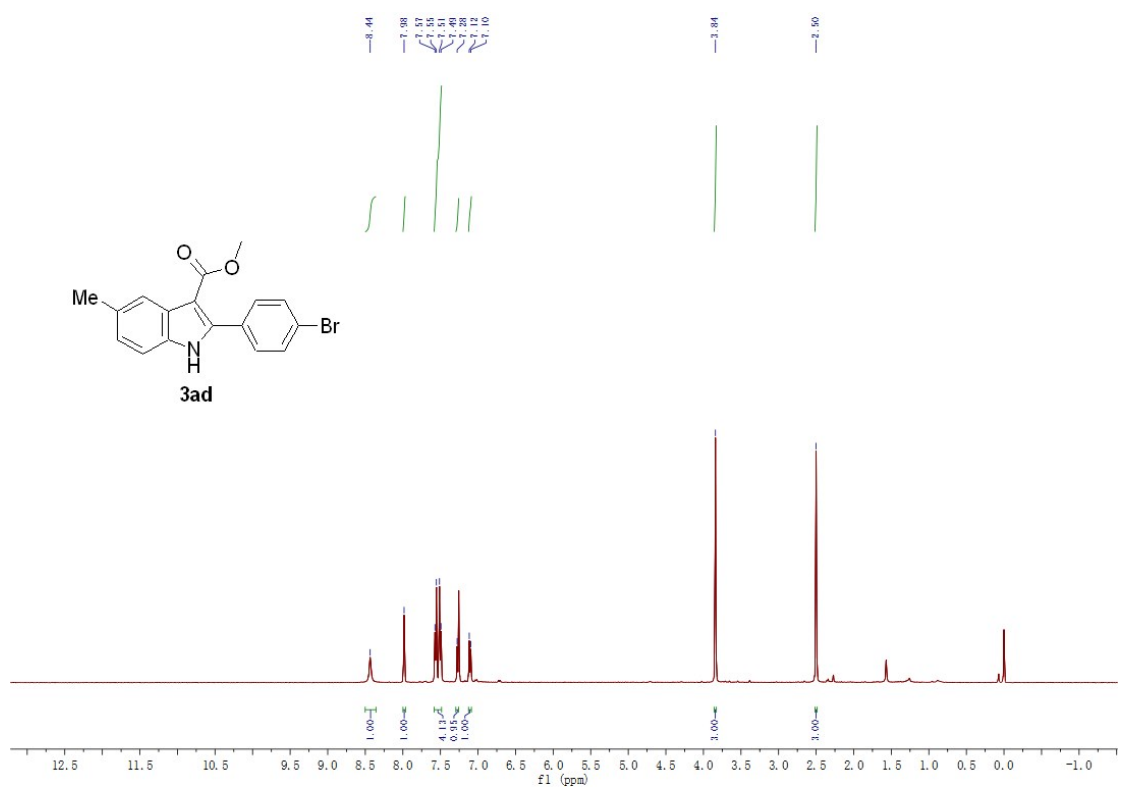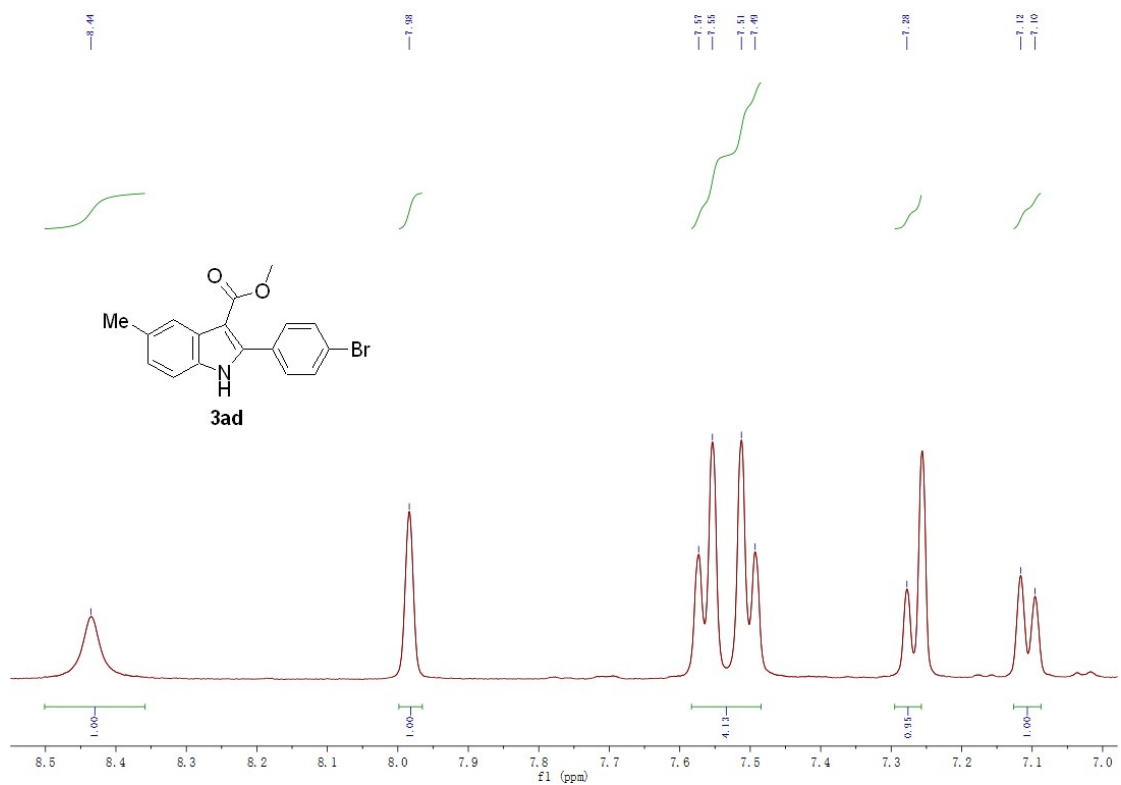



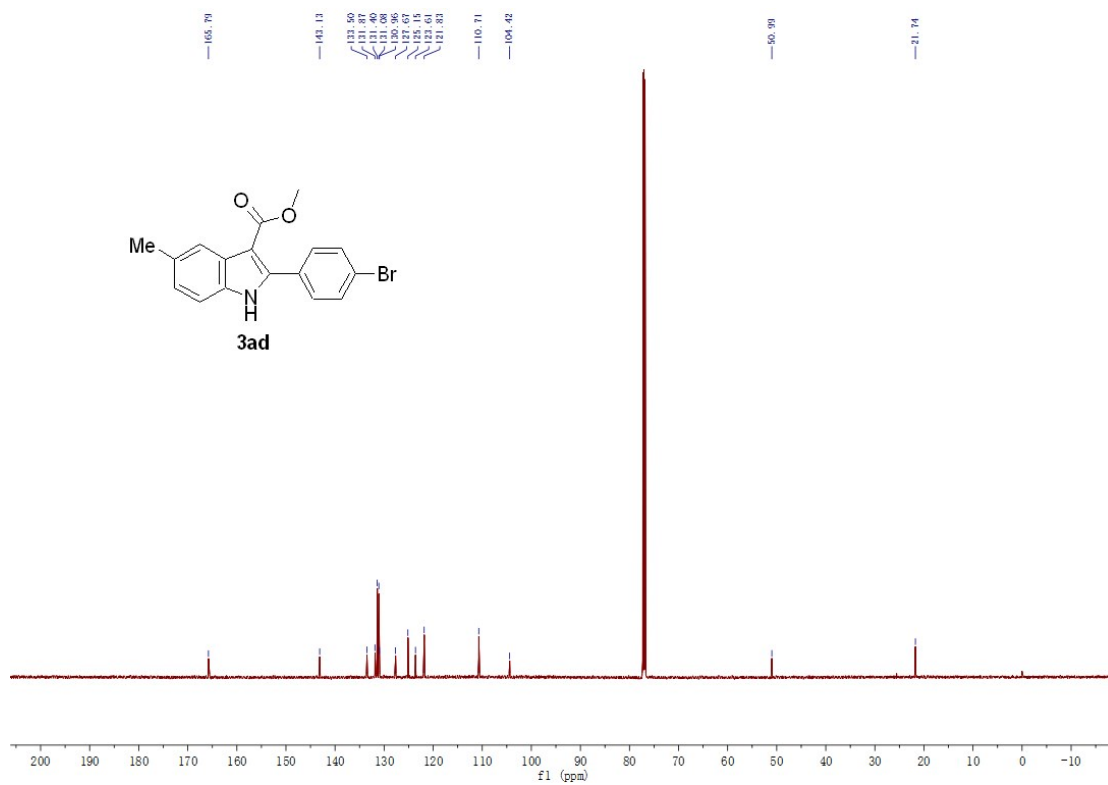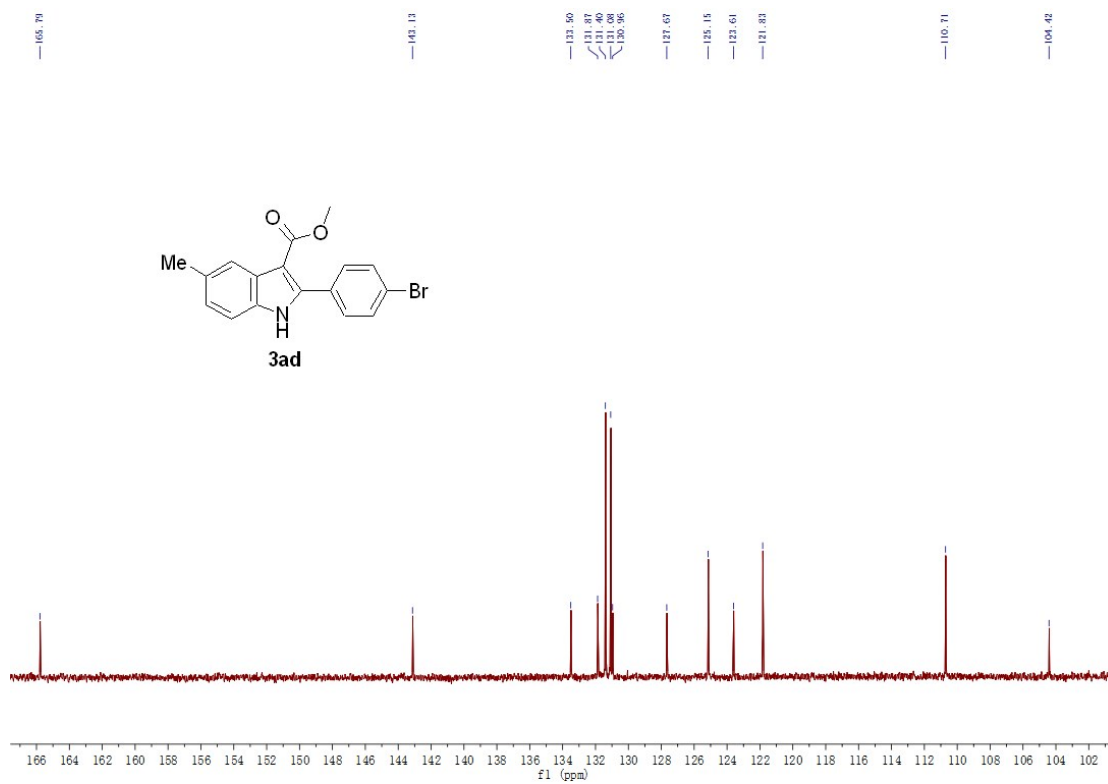

# Ethyl 5-methyl-2-(*p*-tolyl)-1*H*-indole-3-carboxylate (**3ae**)

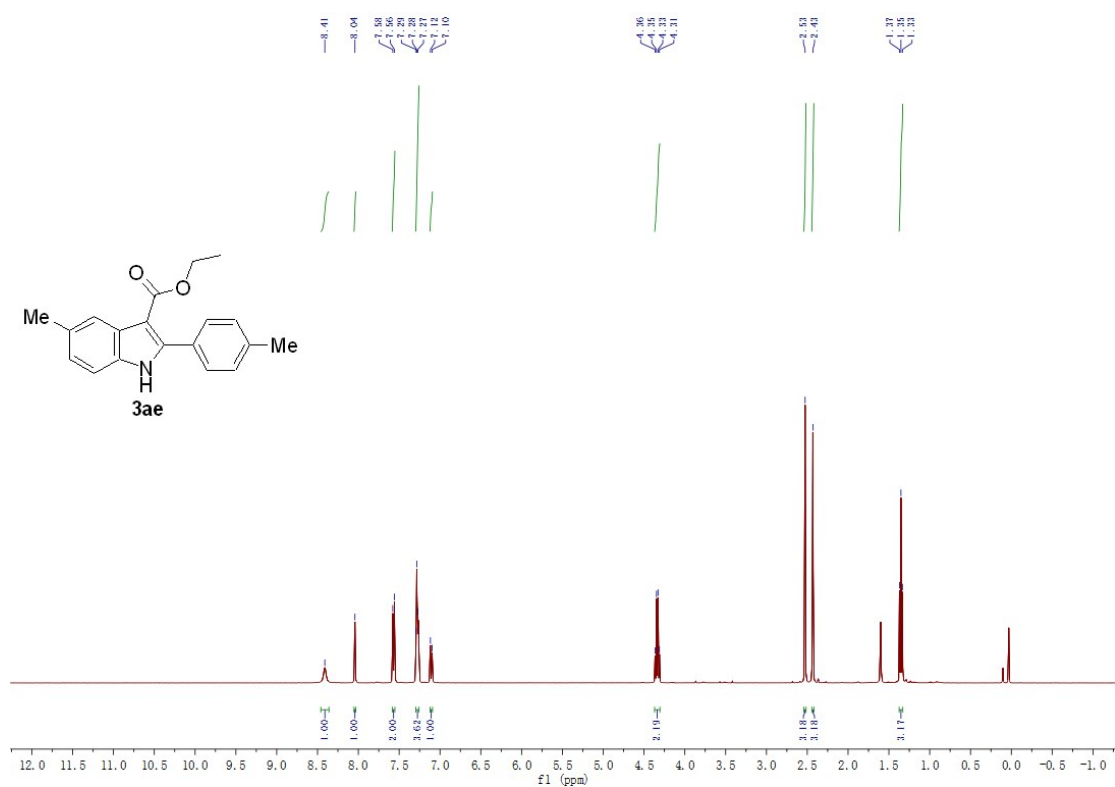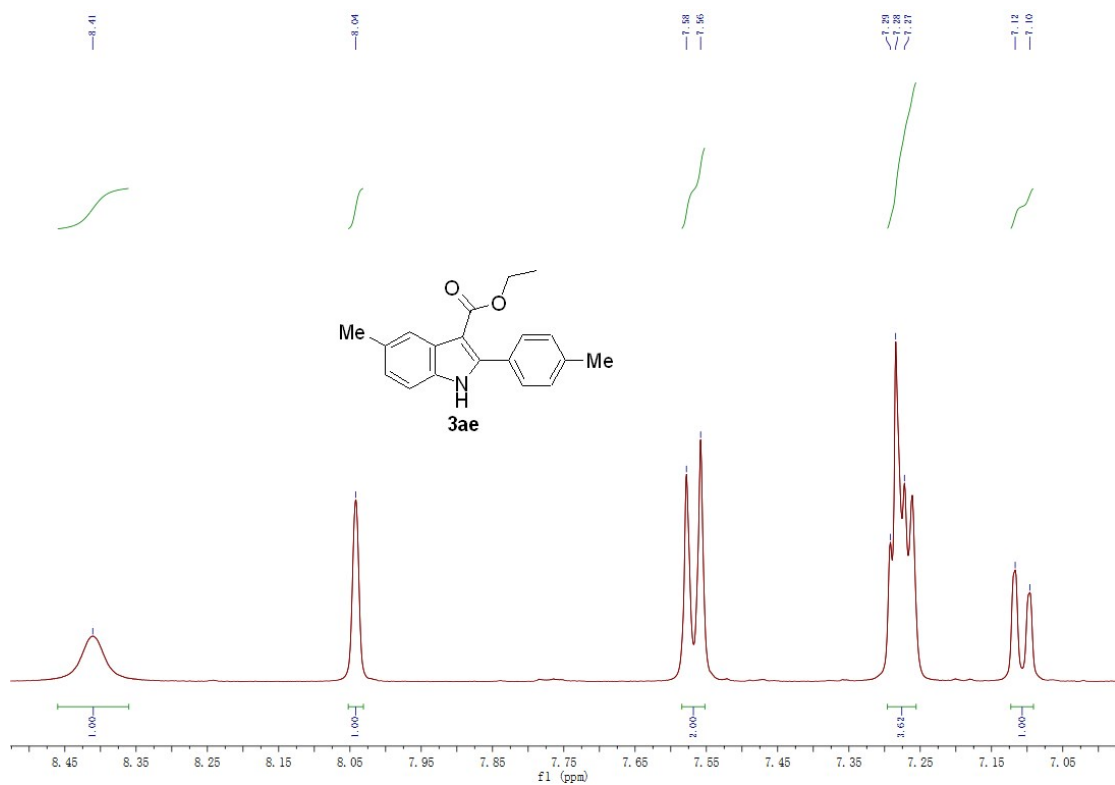

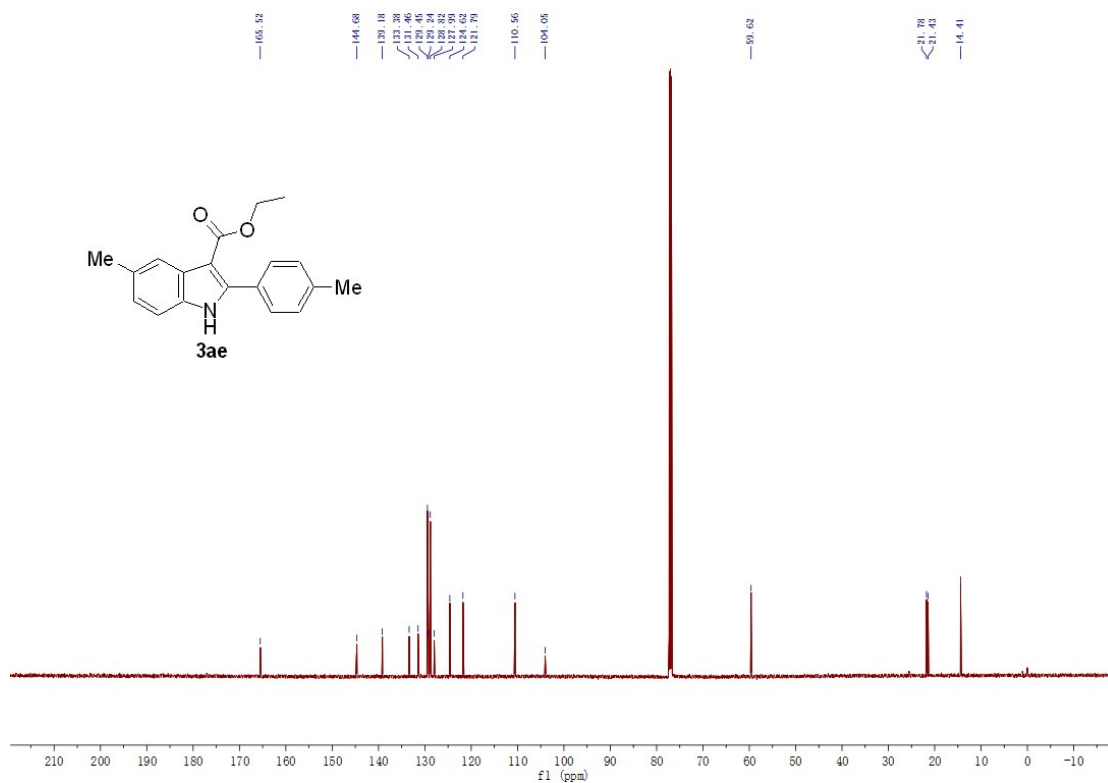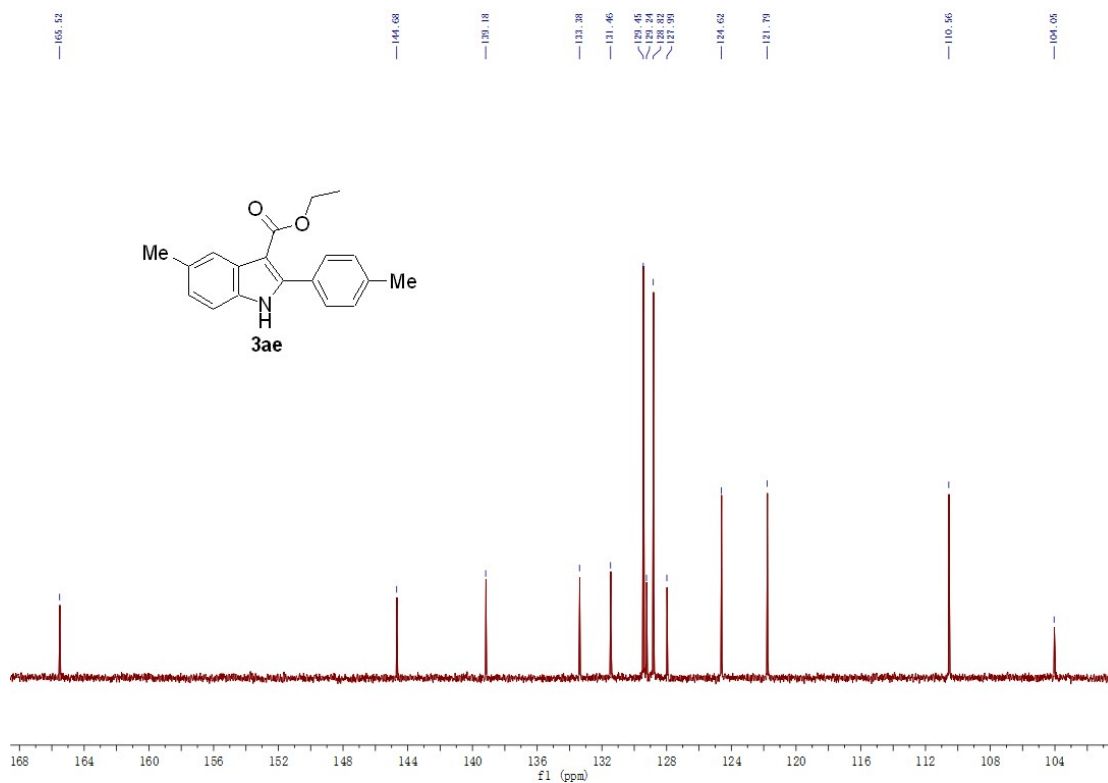

# Methyl 2-(4-methoxyphenyl)-5-methyl-1H-indole-3-carboxylate (3af)

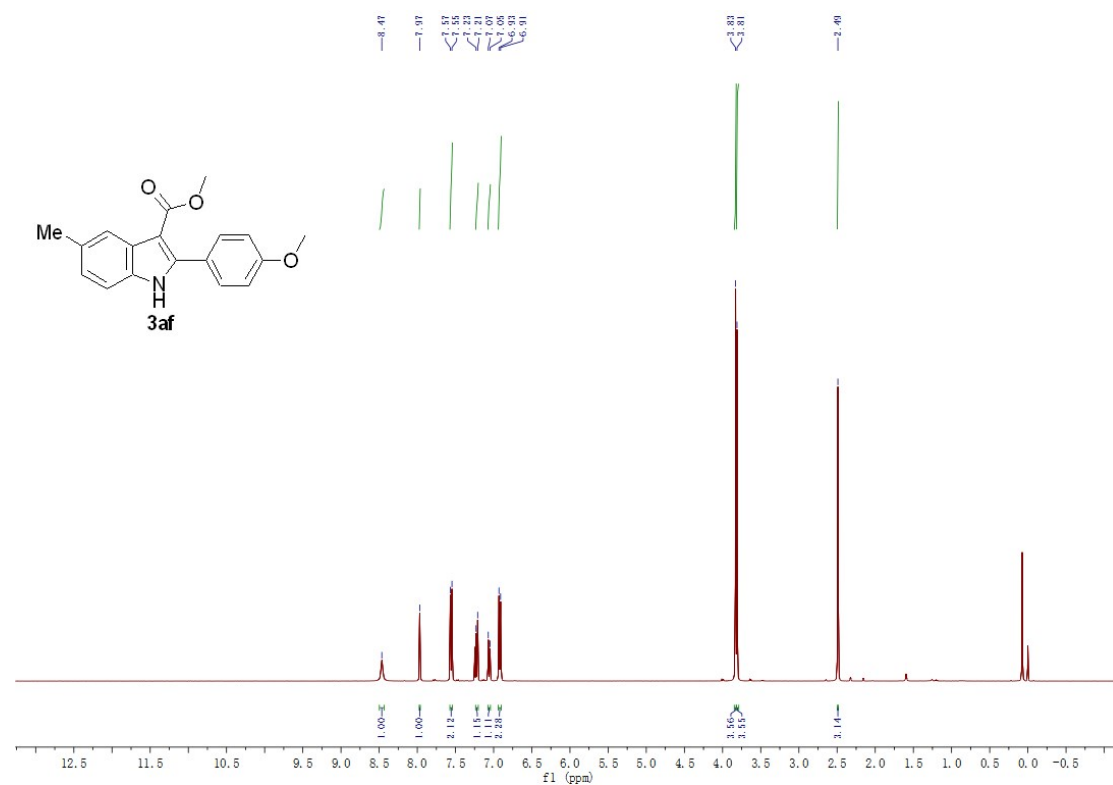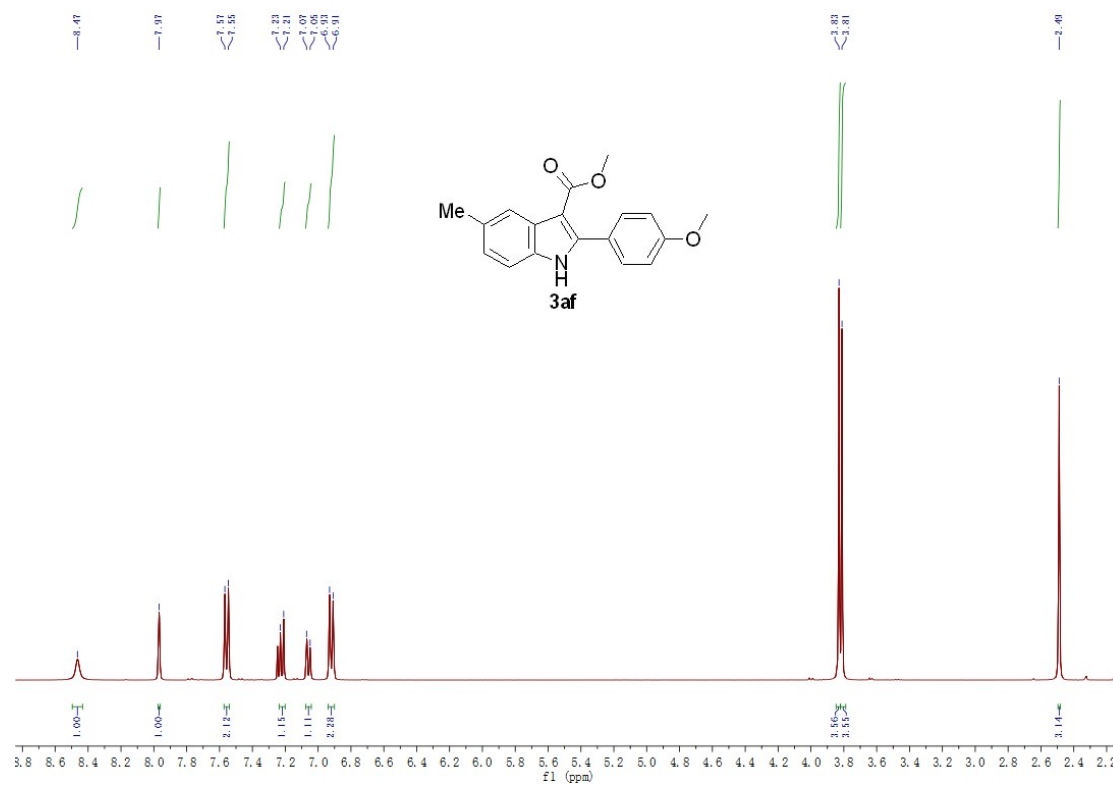

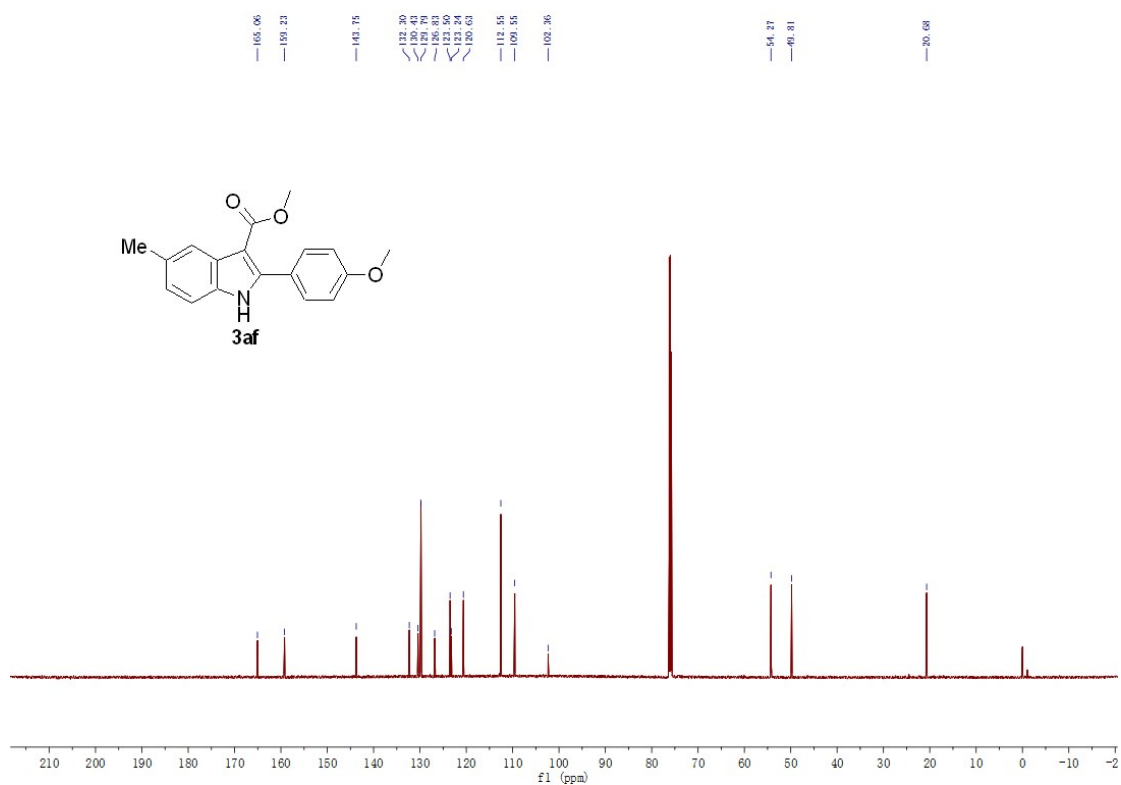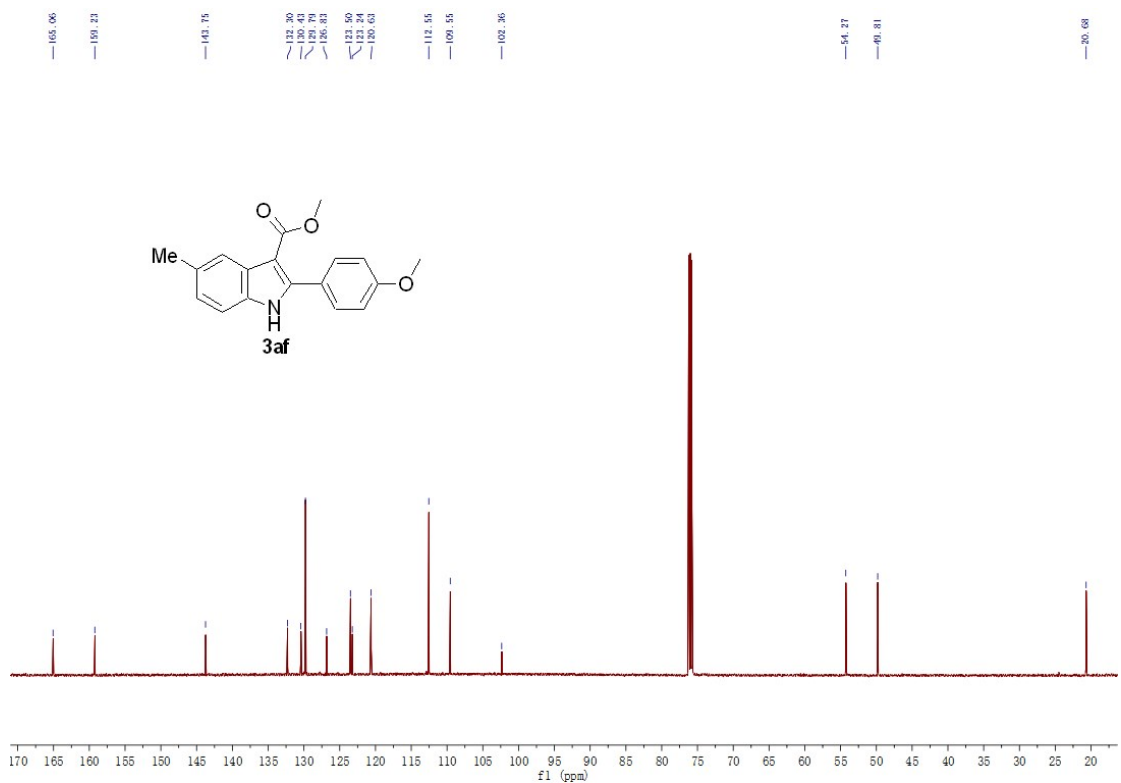

**Methyl 5-methoxy-2-(4-methoxyphenyl)-1H-indole-3-carboxylate (3ag)**

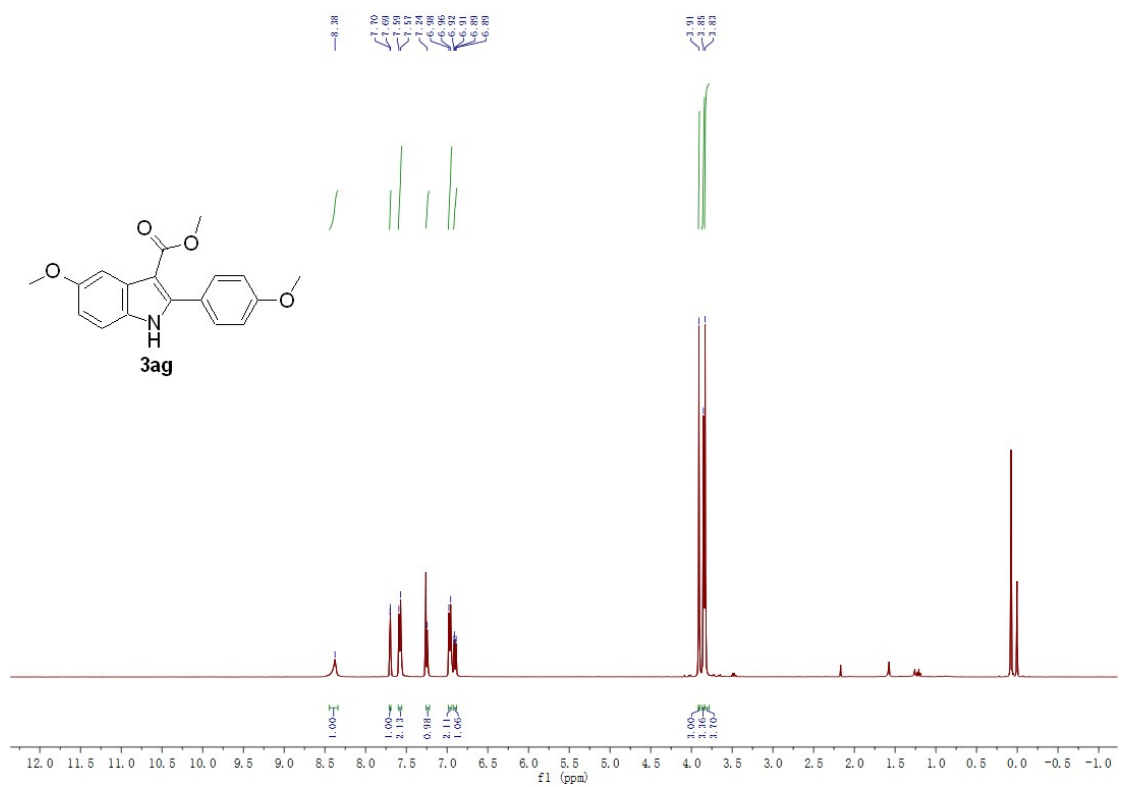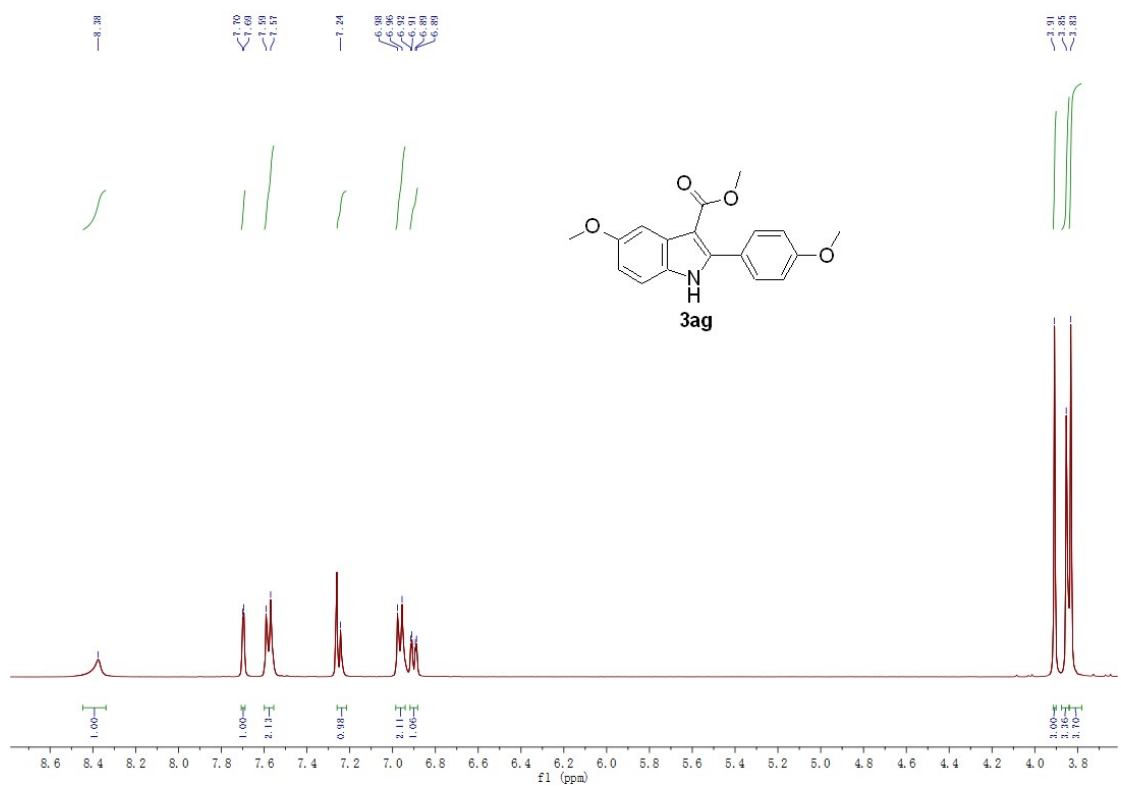

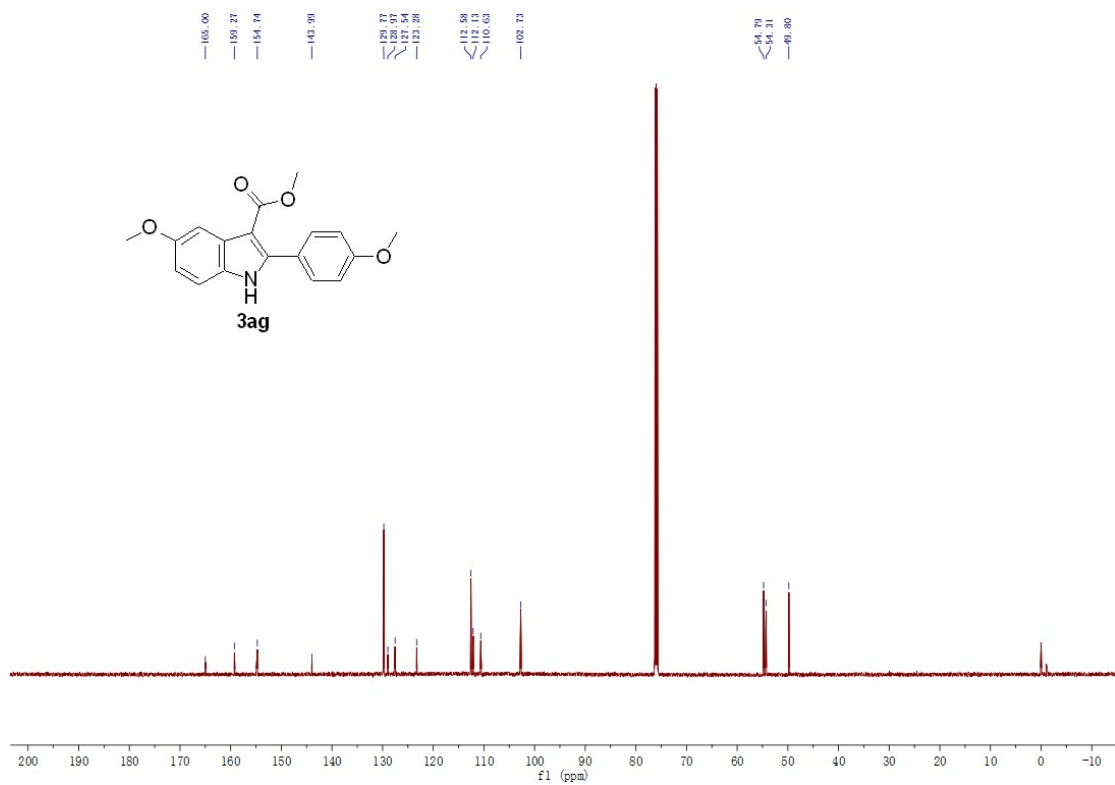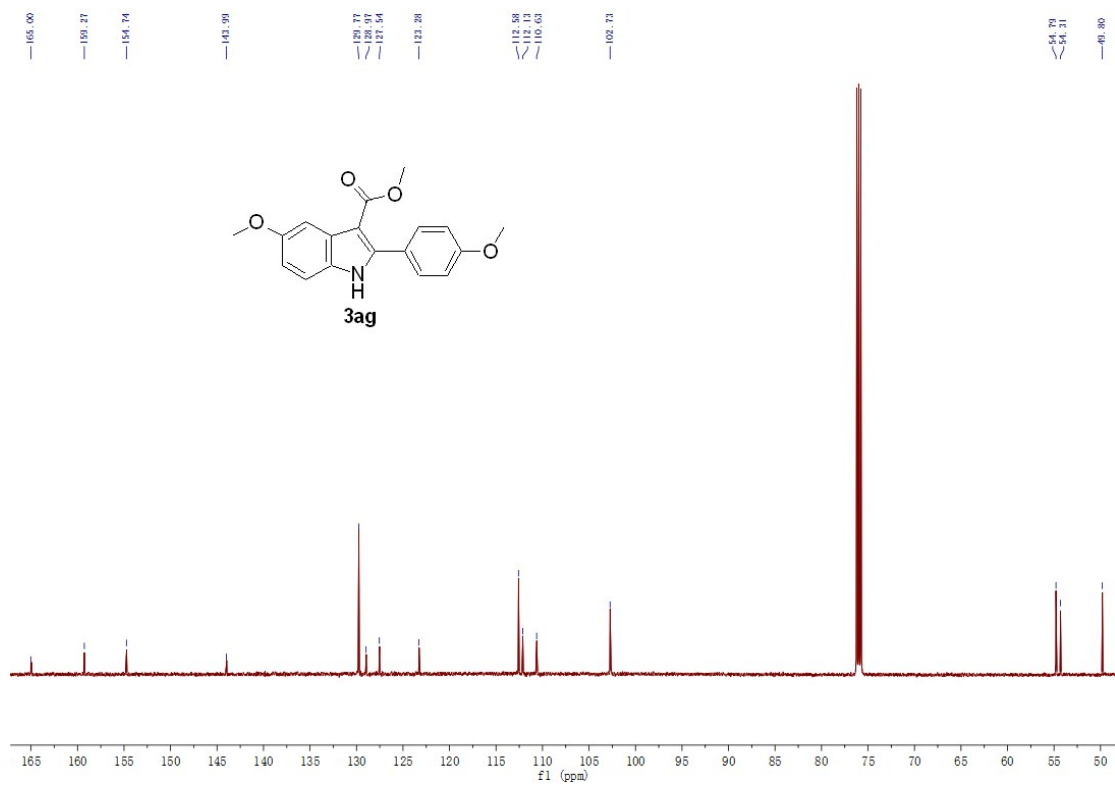

**Methyl 2-(4-(*tert*-butyl) phenyl)-5-methyl-1*H*-indole-3-carboxylate (3ah)**

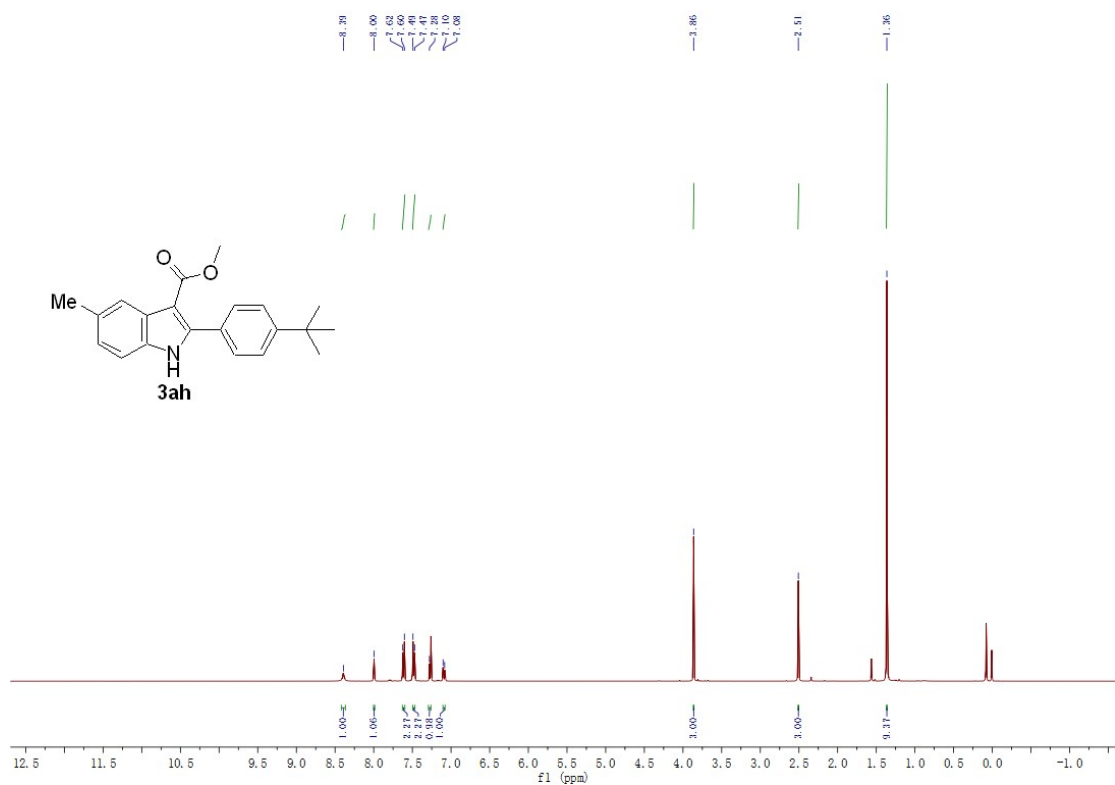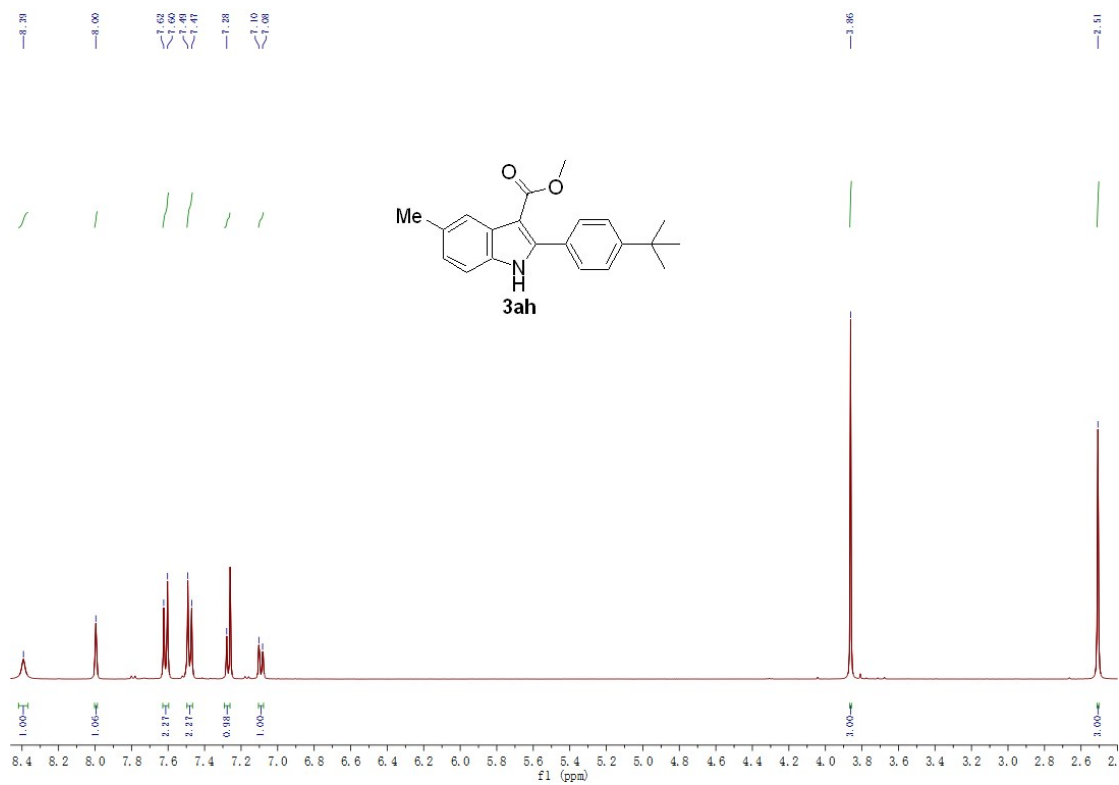



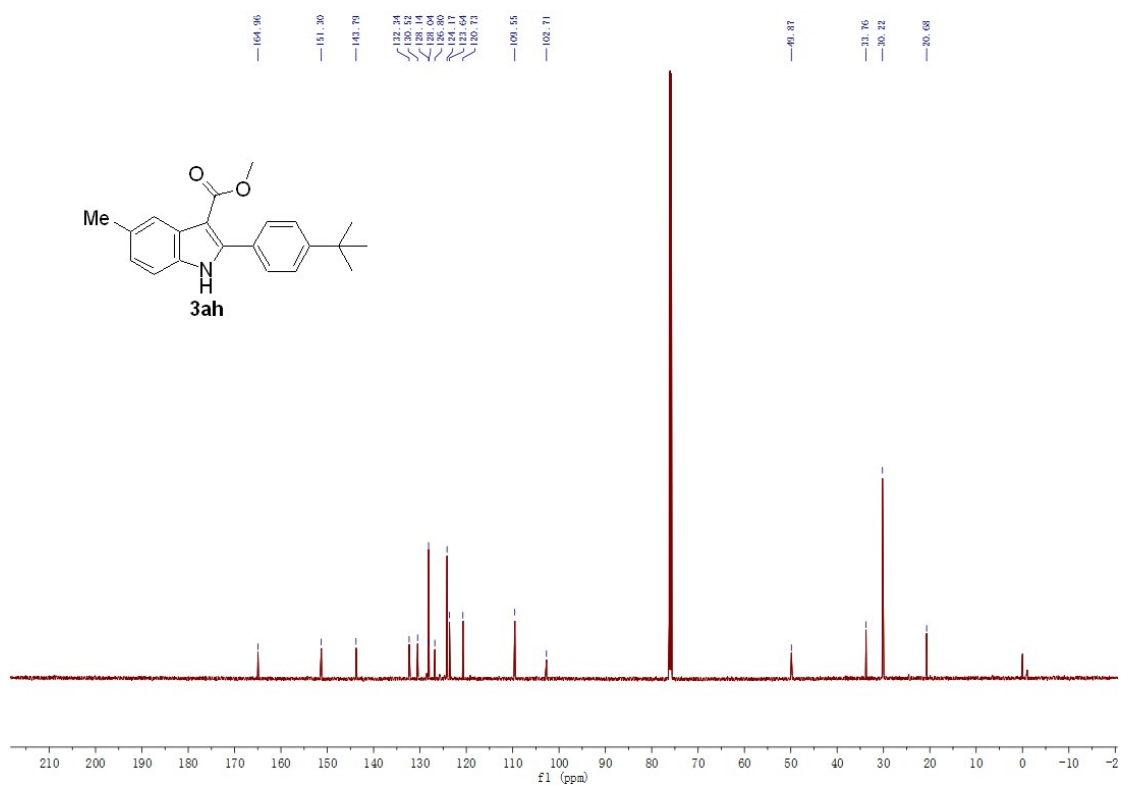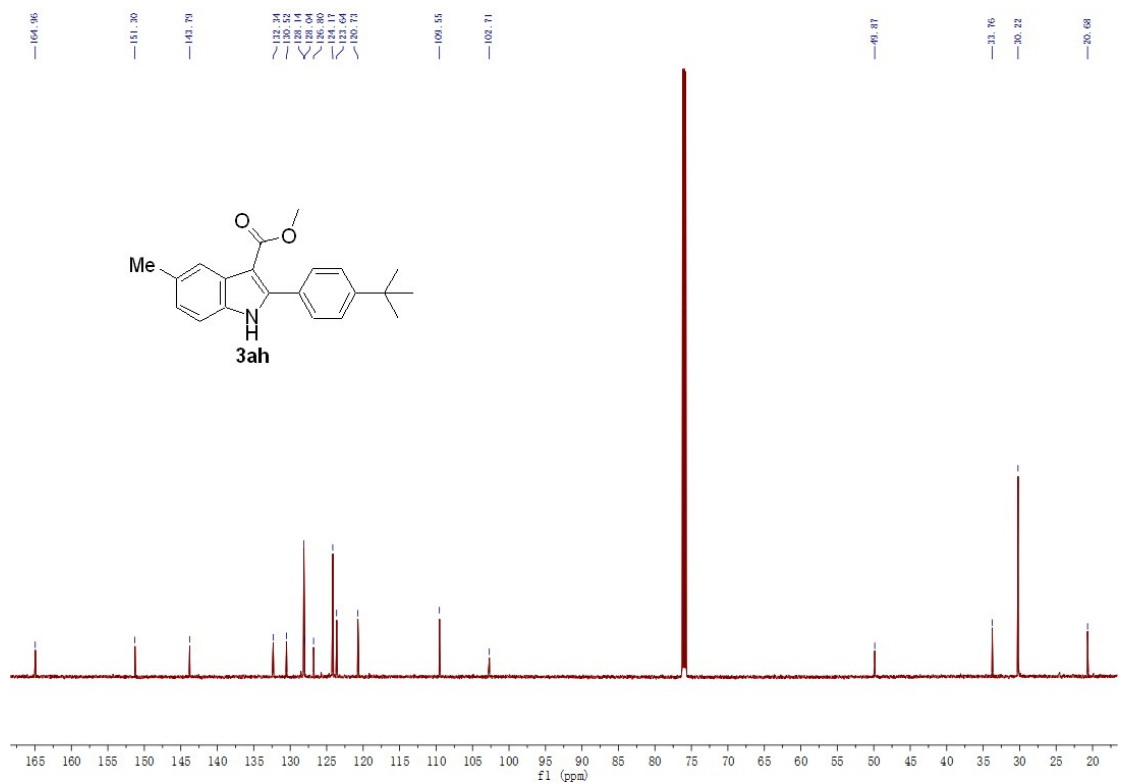

# Methyl 2-(4-ethoxyphenyl)-5-methyl-1H-indole-3-carboxylate (3ai)

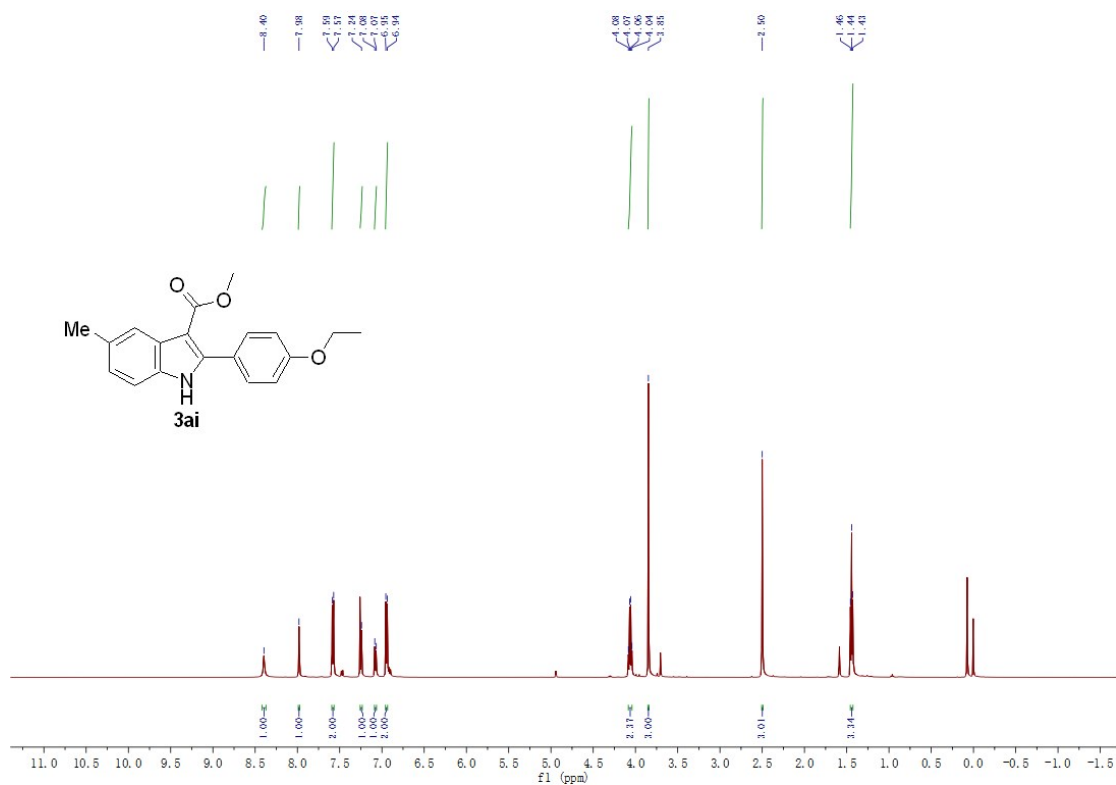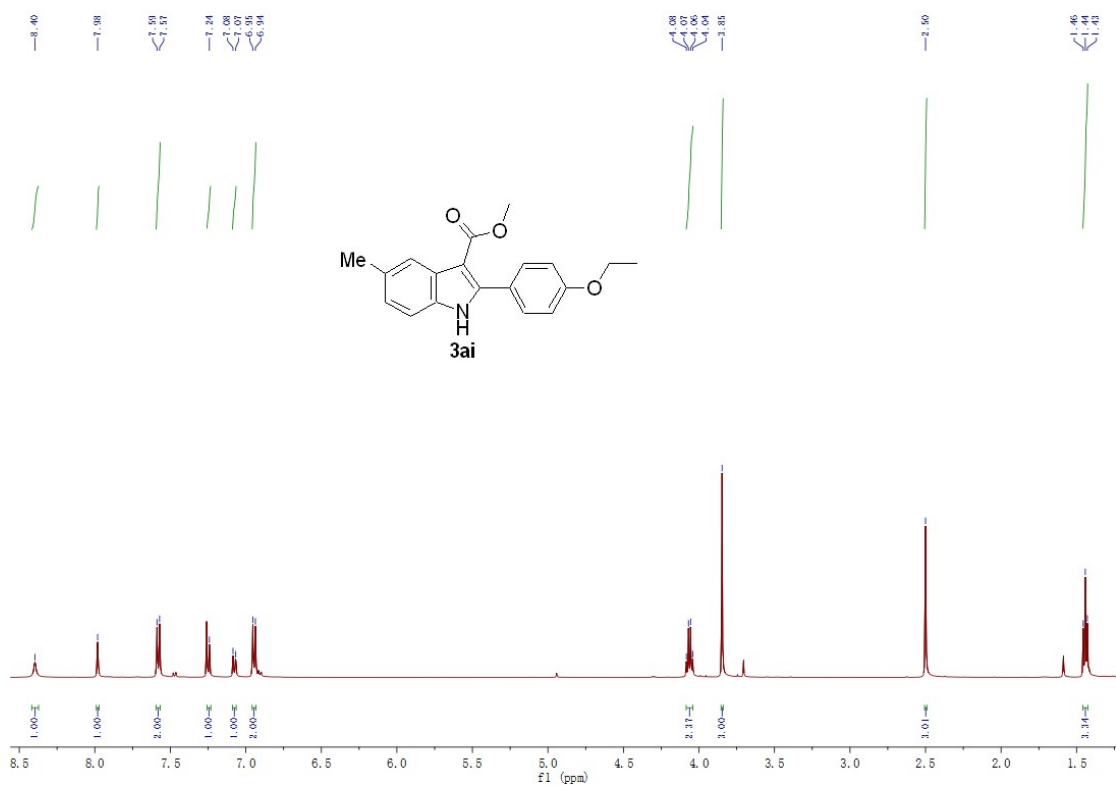

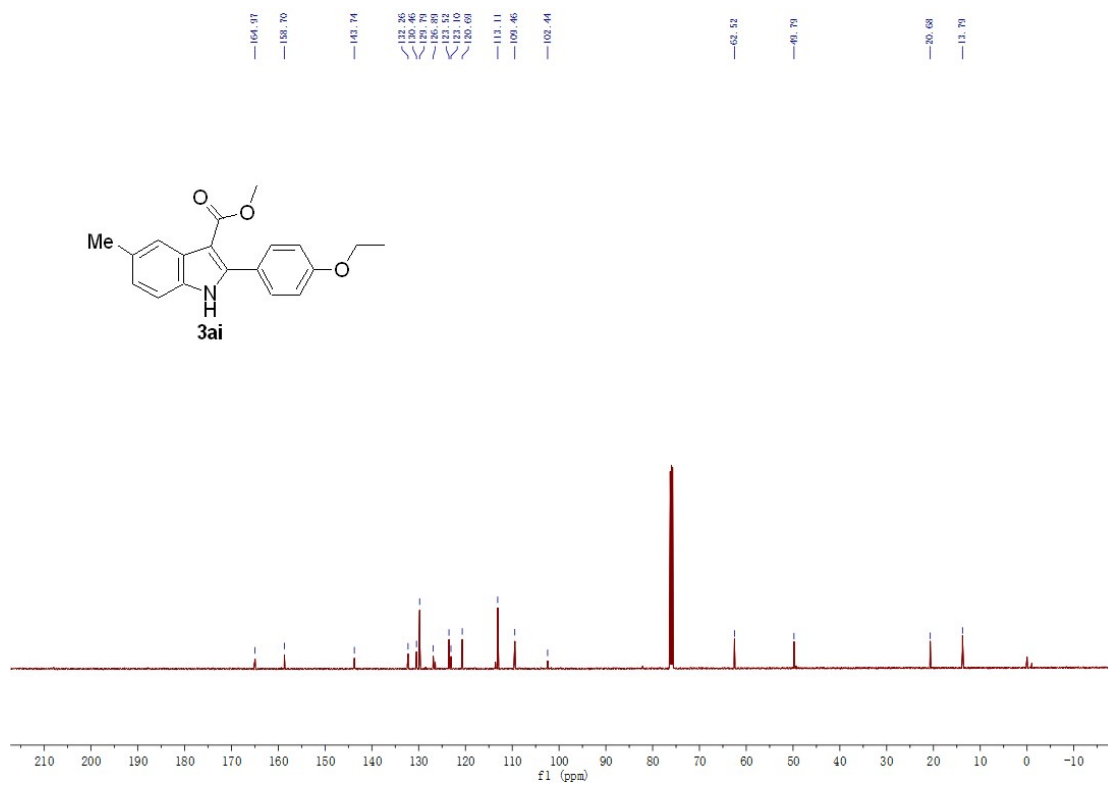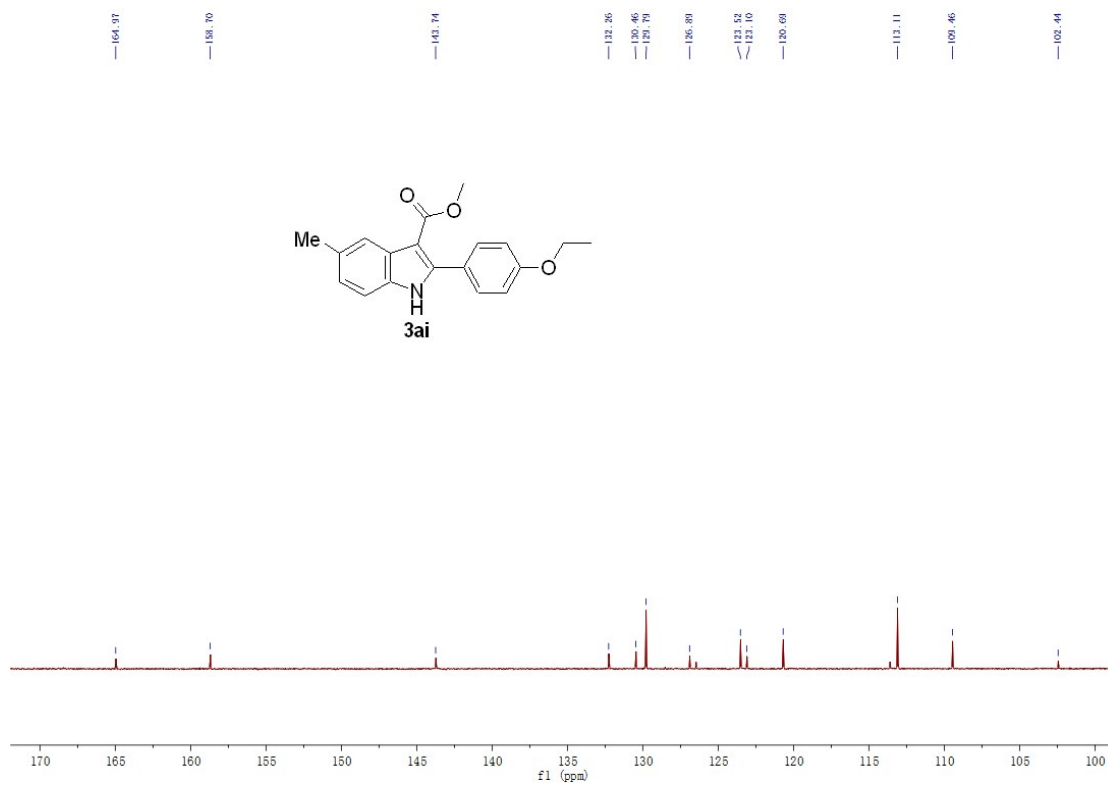

**Methyl 5-methyl-2-[4-(trifluoromethyl)phenyl]-1*H*-indole-3-carboxylate (3aj)**

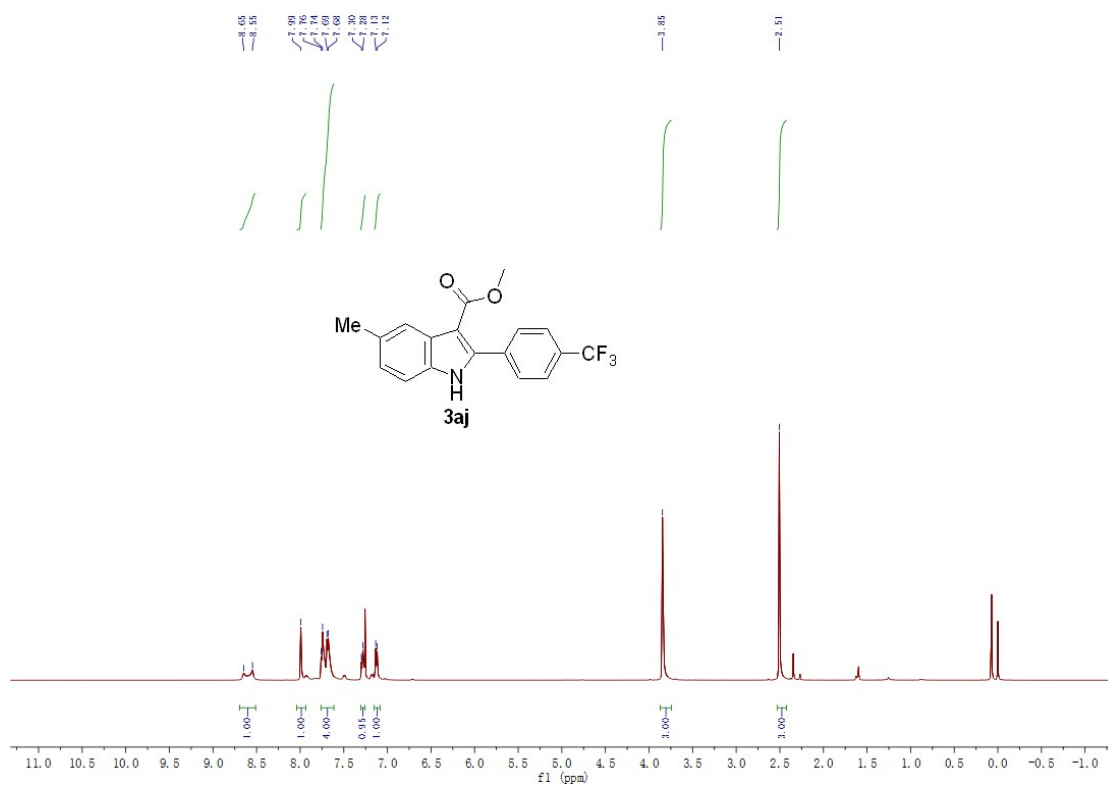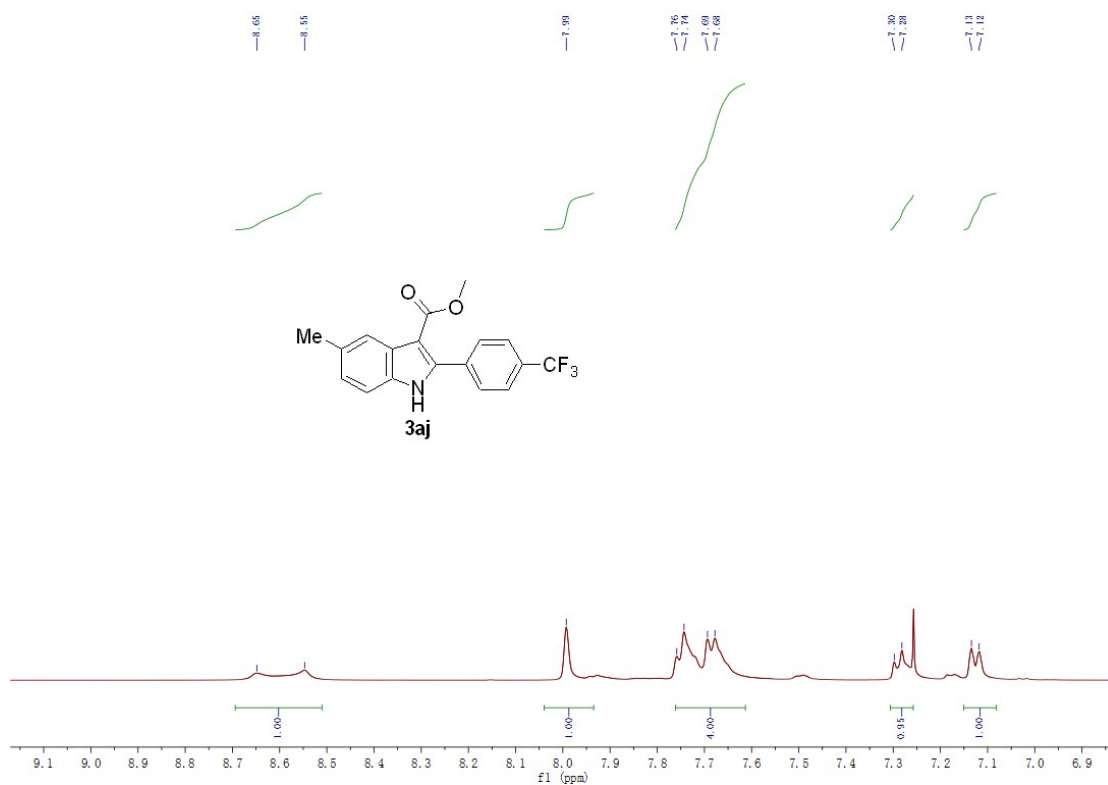

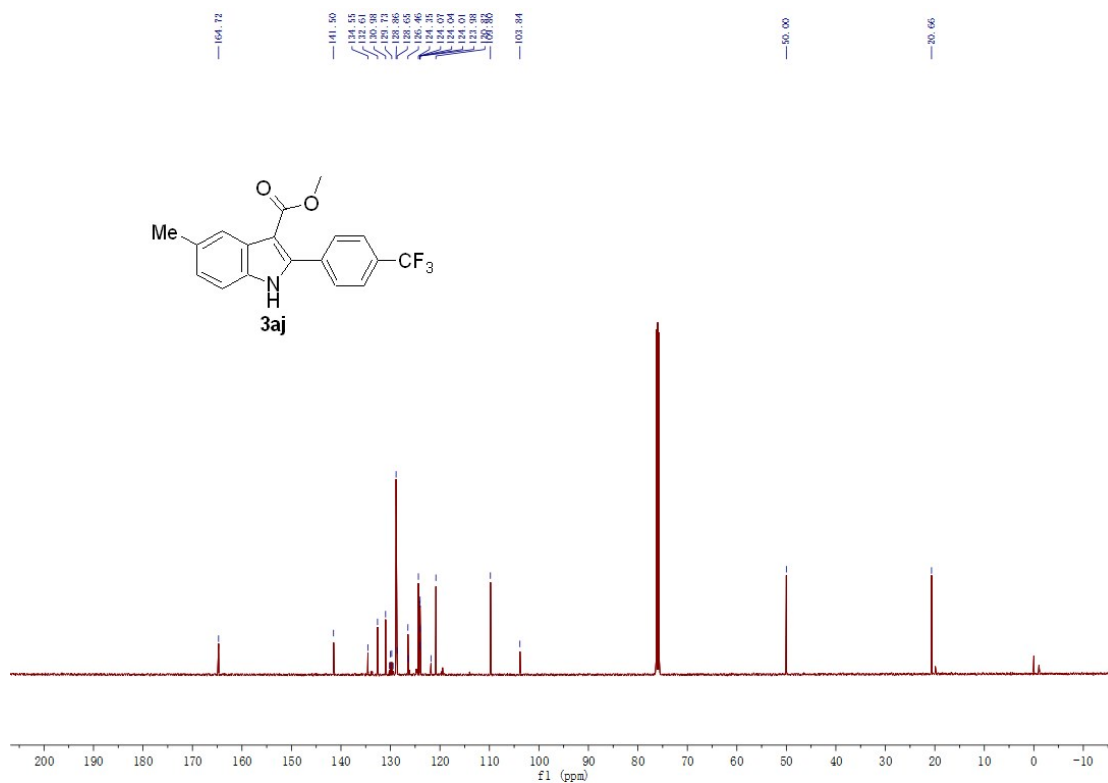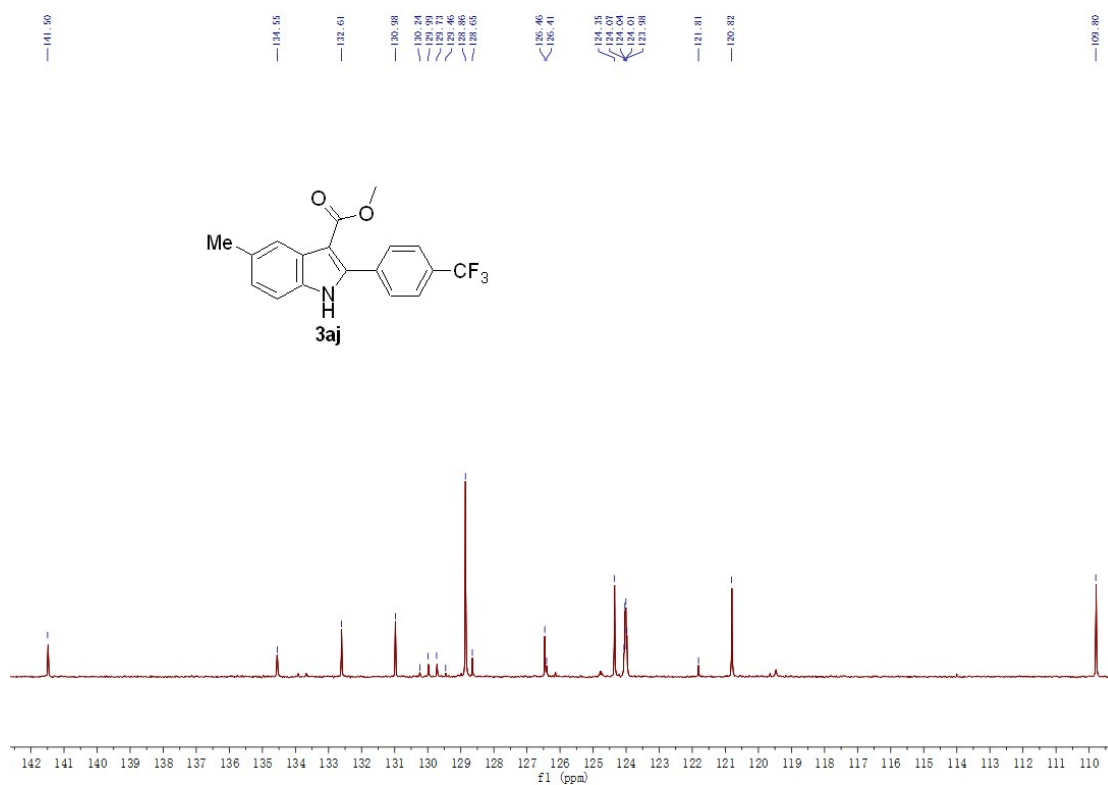

**Methyl 2-(3-fluorophenyl)-5-methyl-1H-indole-3-carboxylate (3ak)**

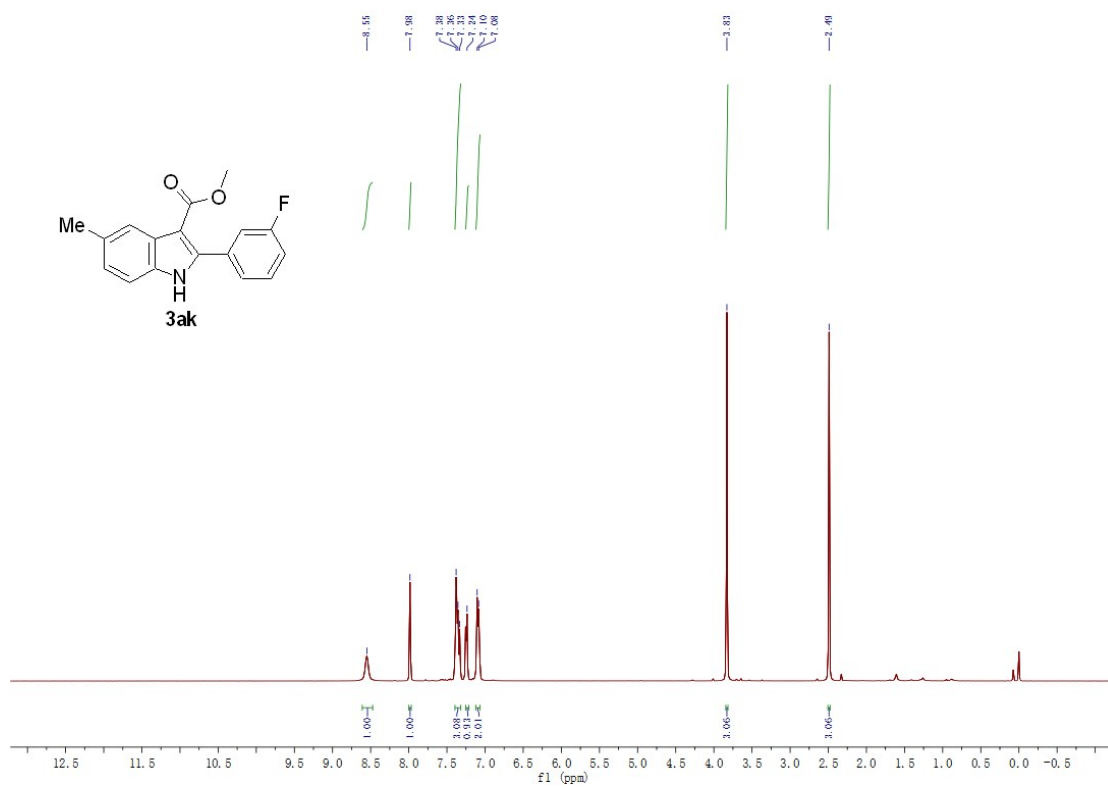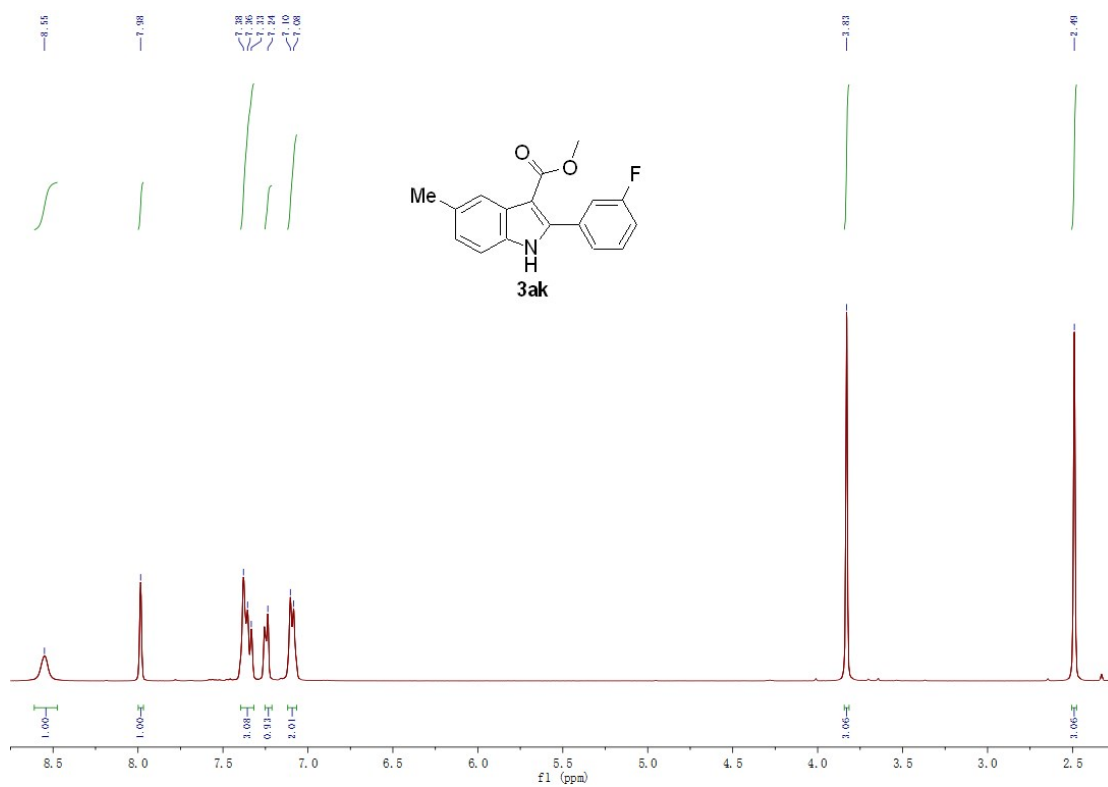

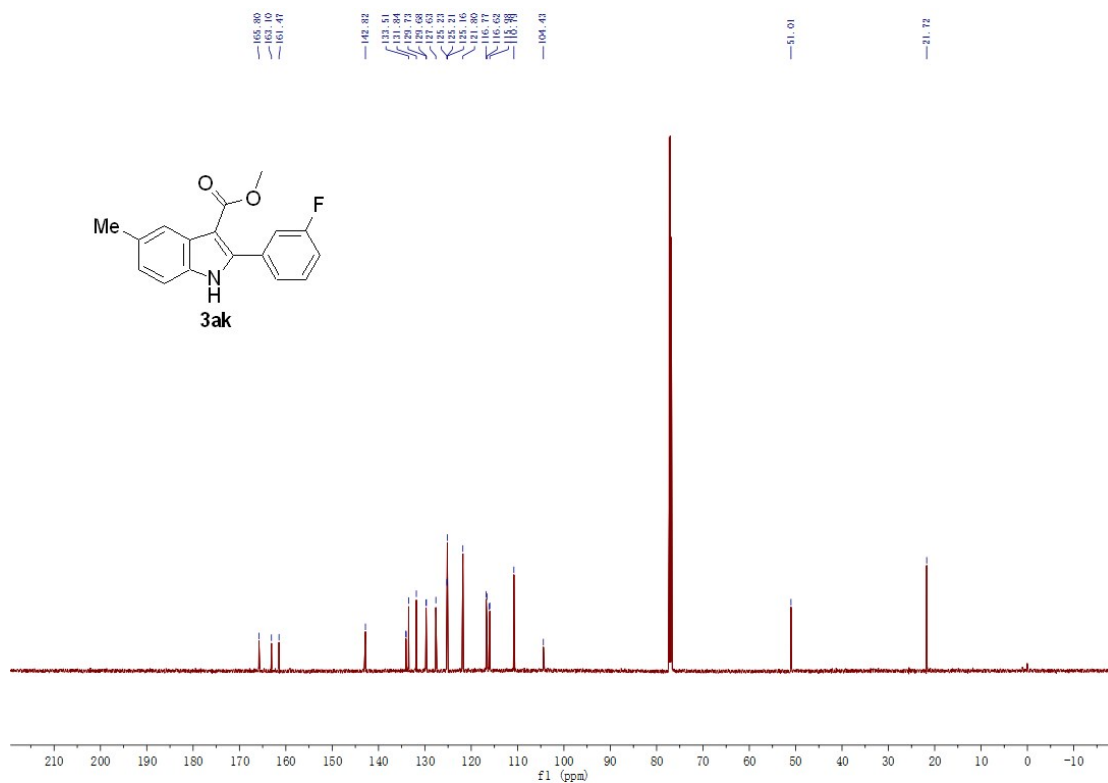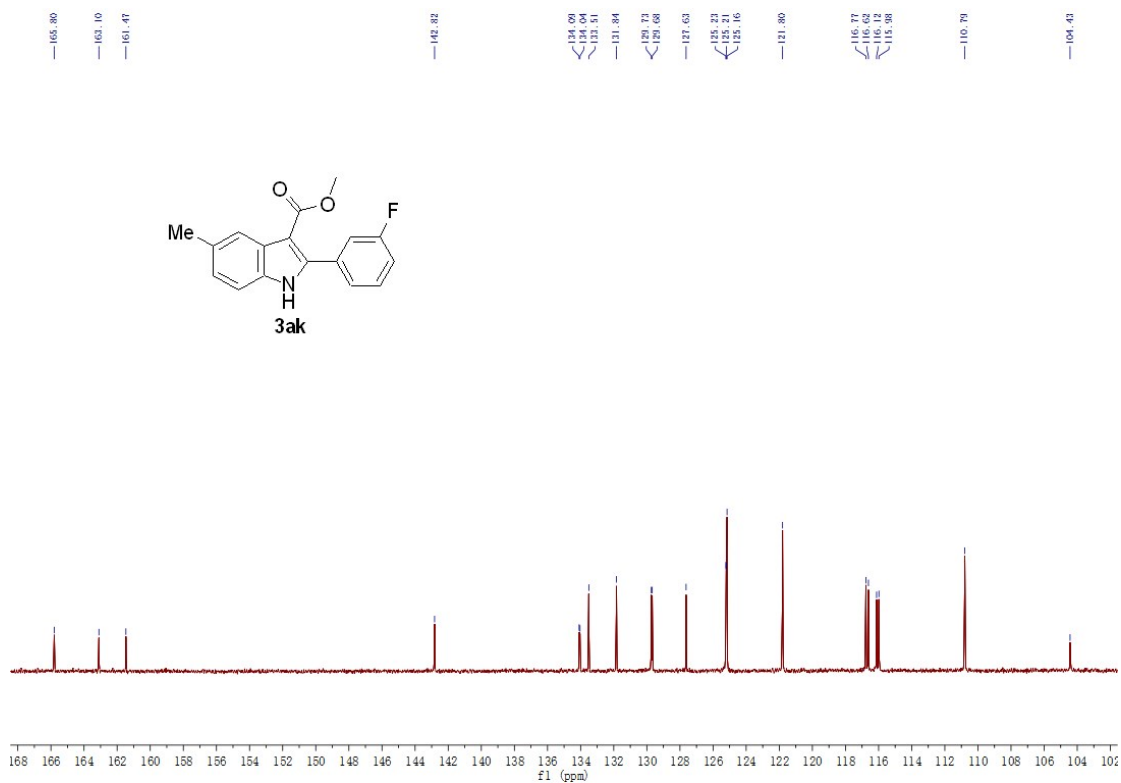

# Methyl 2-(3-chlorophenyl)-5-methyl-1H-indole-3-carboxylate (3al)

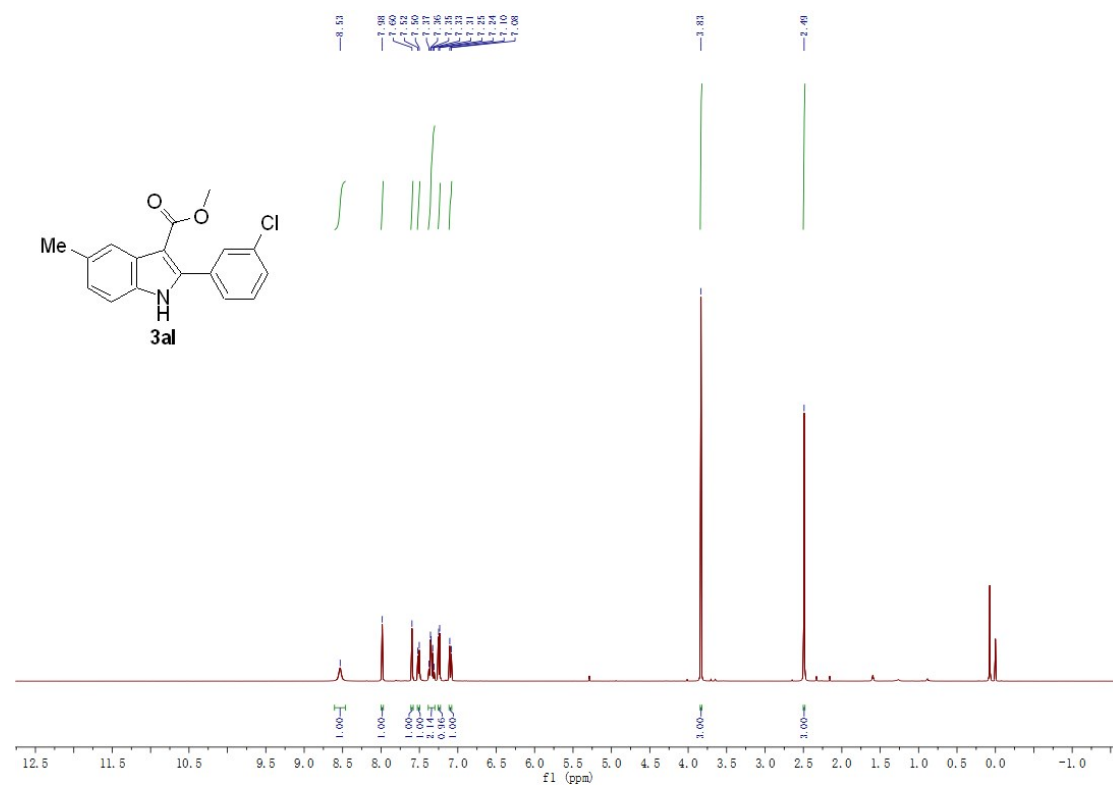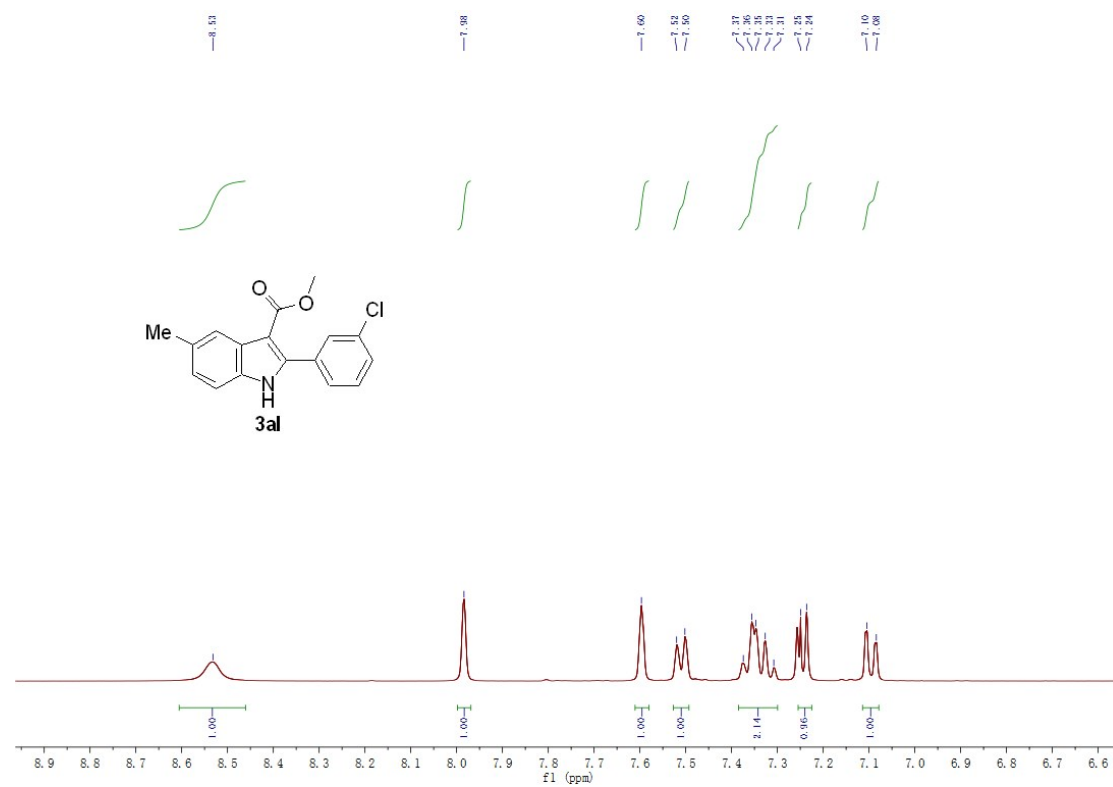



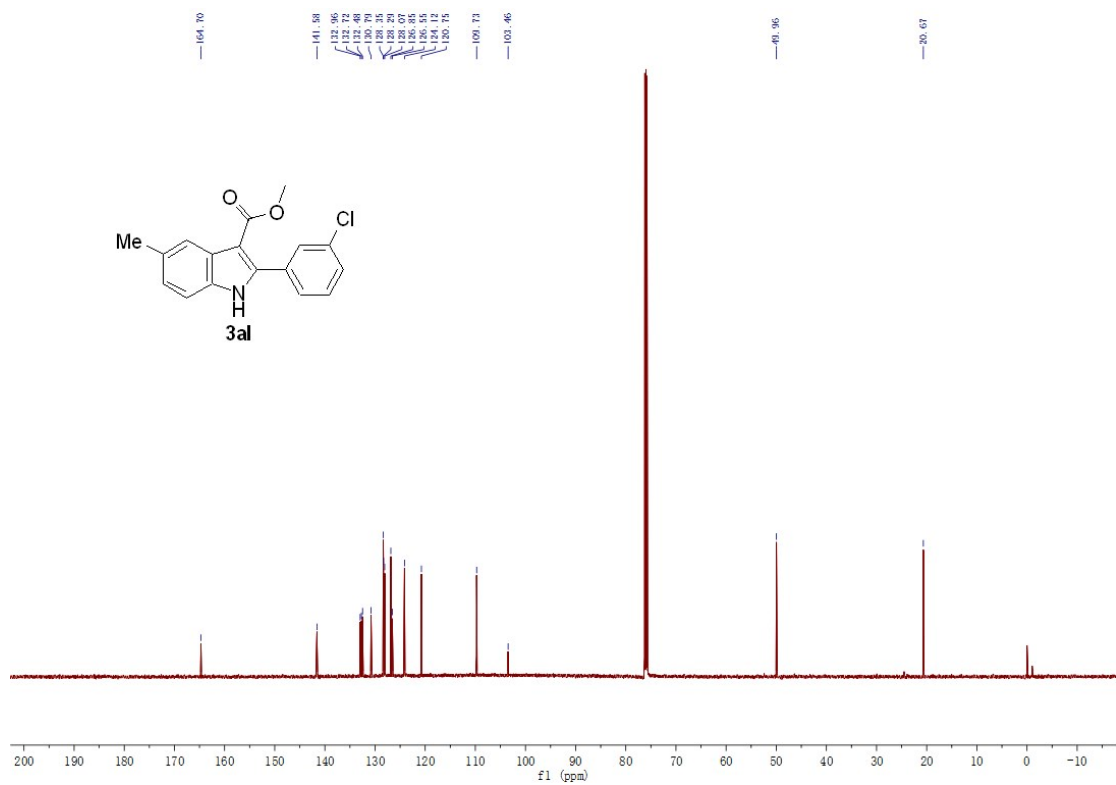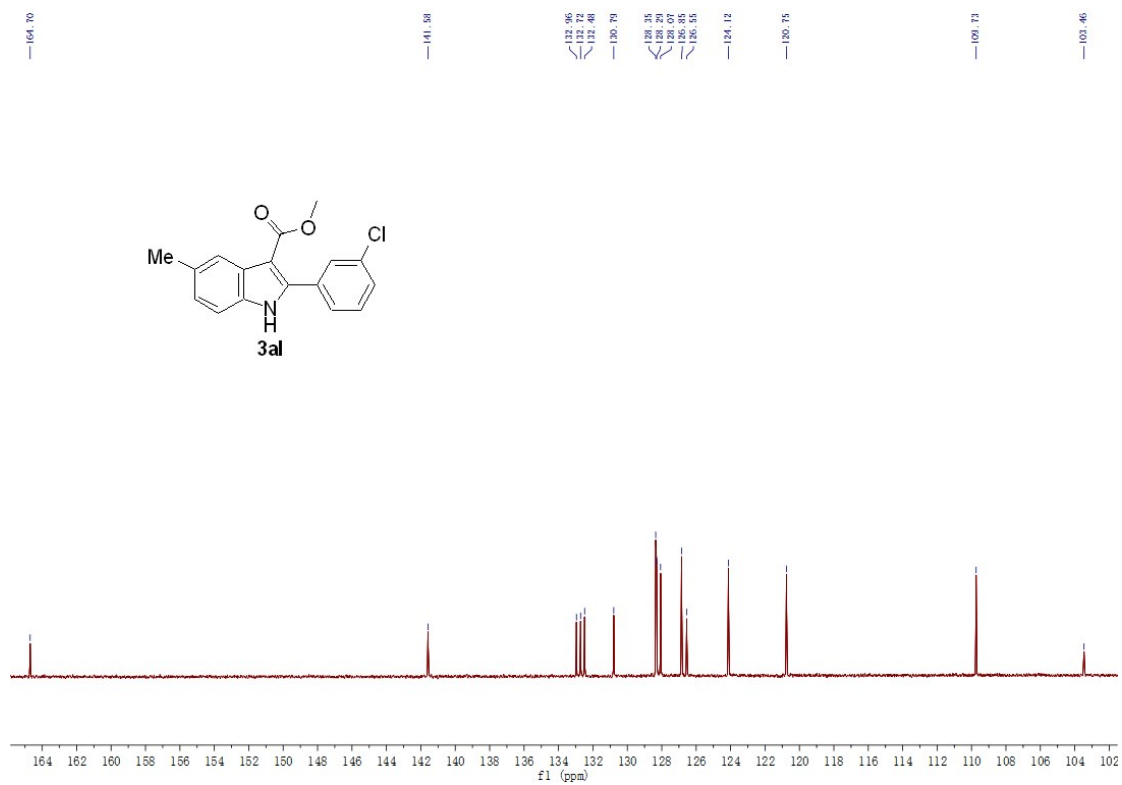

# Methyl 5-methyl-2-(*m*-tolyl)-1*H*-indole-3-carboxylate (3am)

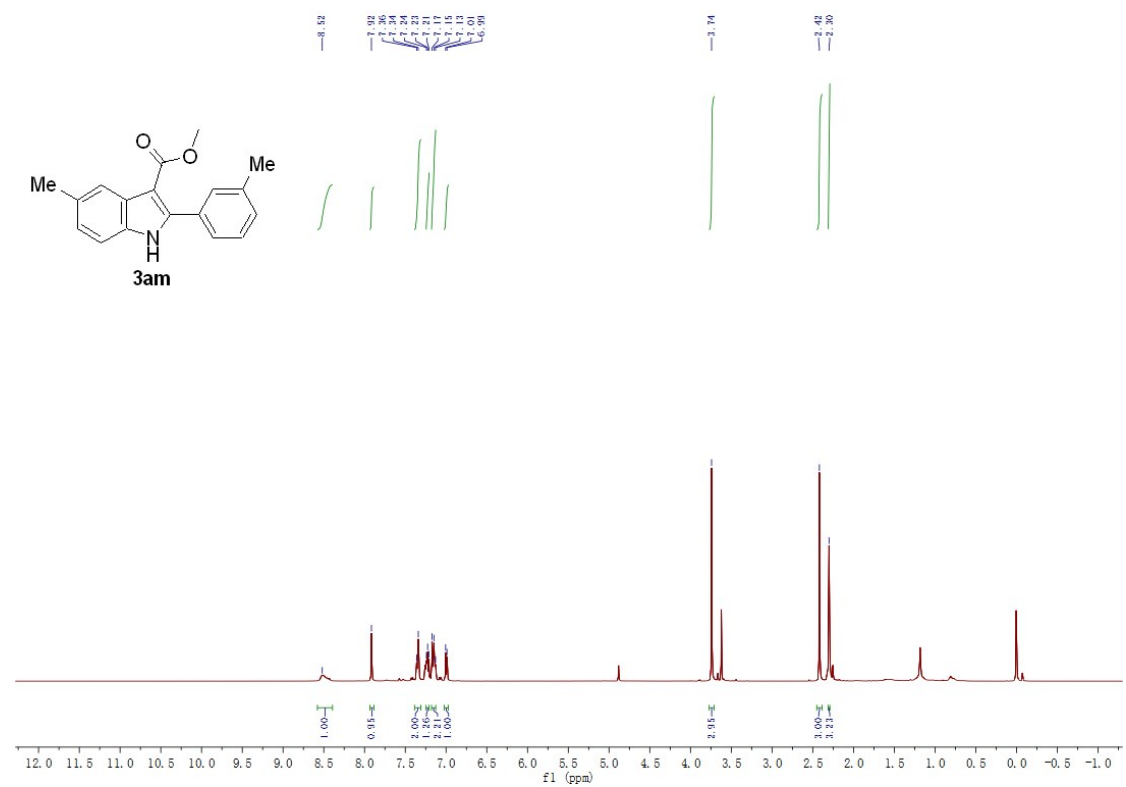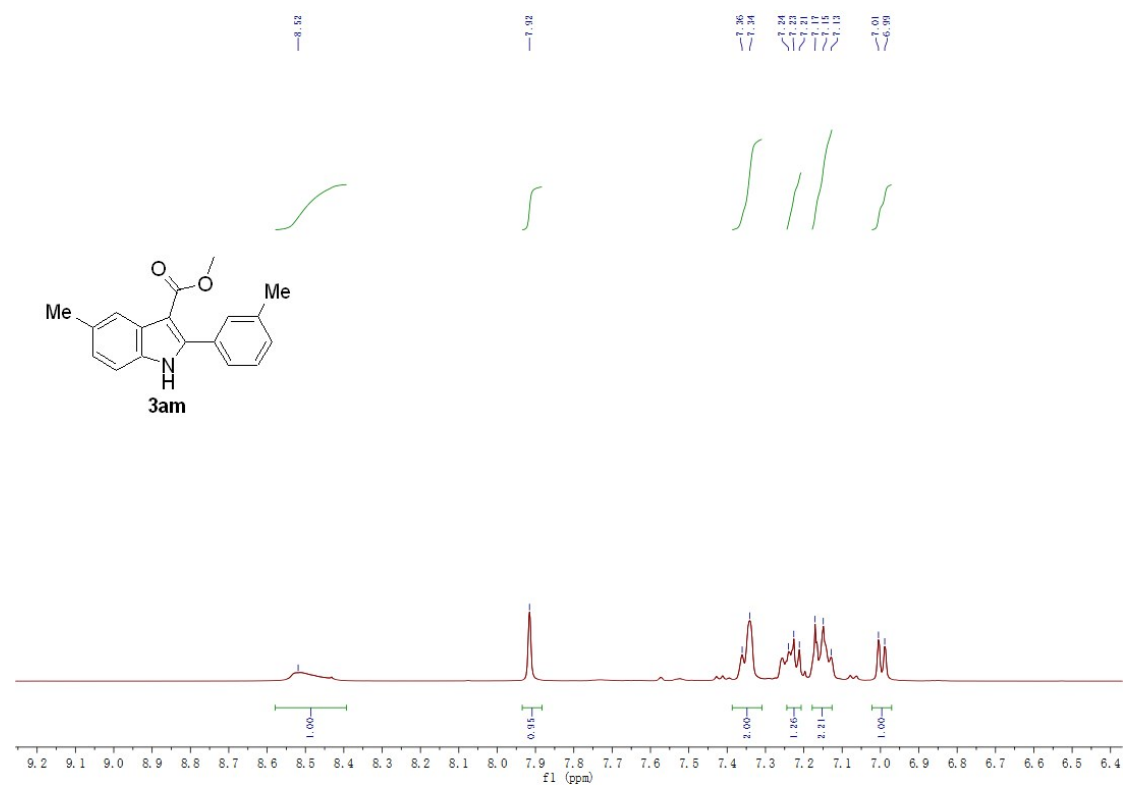

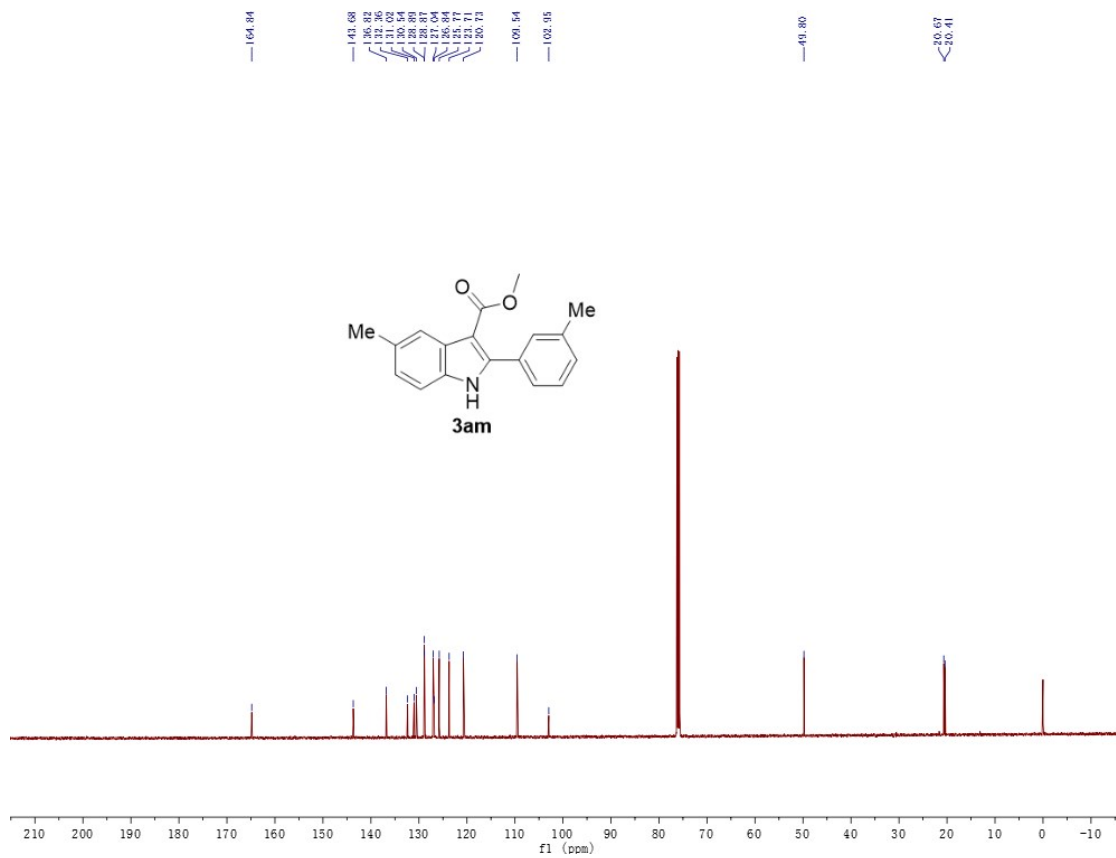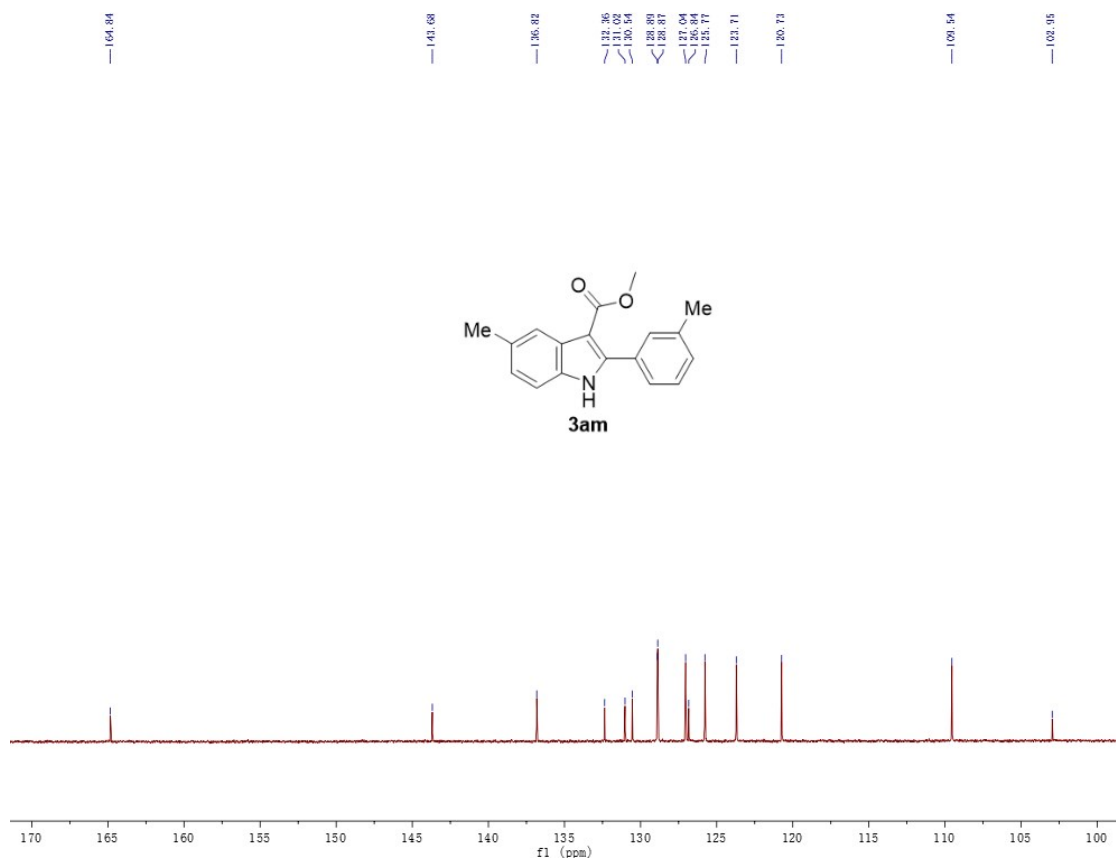

**Methyl 5-methoxy-2-(*m*-tolyl)-1*H*-indole-3-carboxylate (3an)**

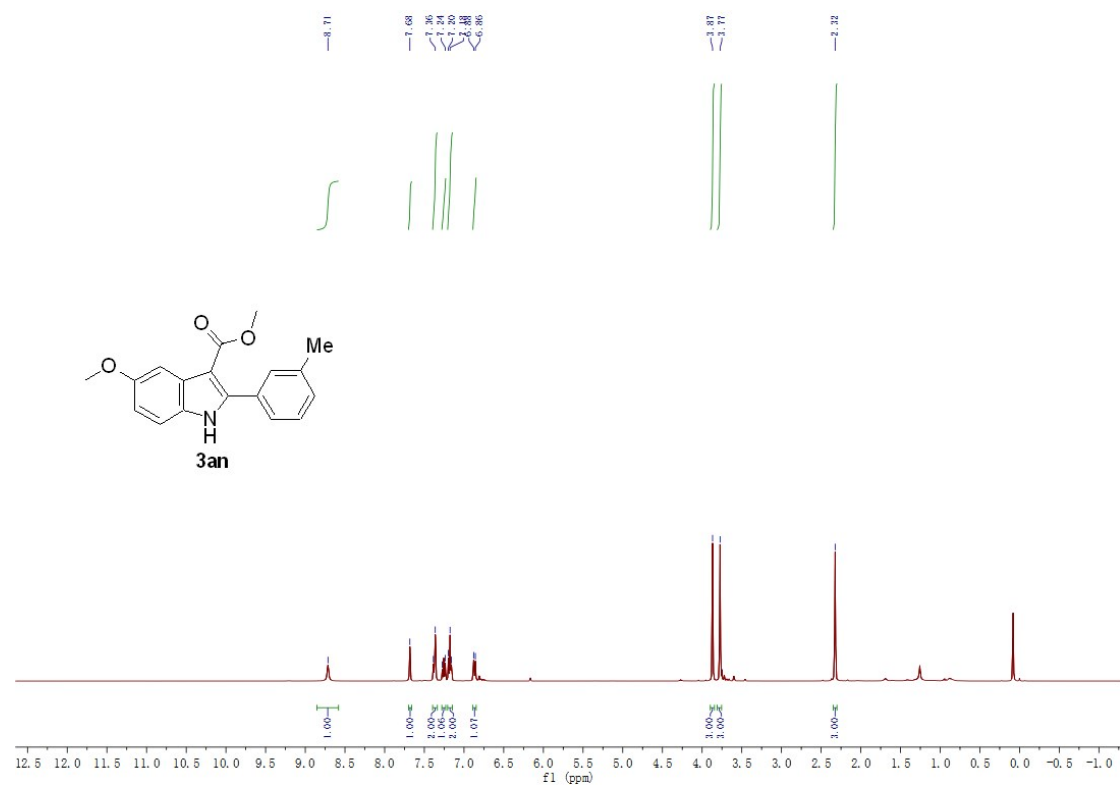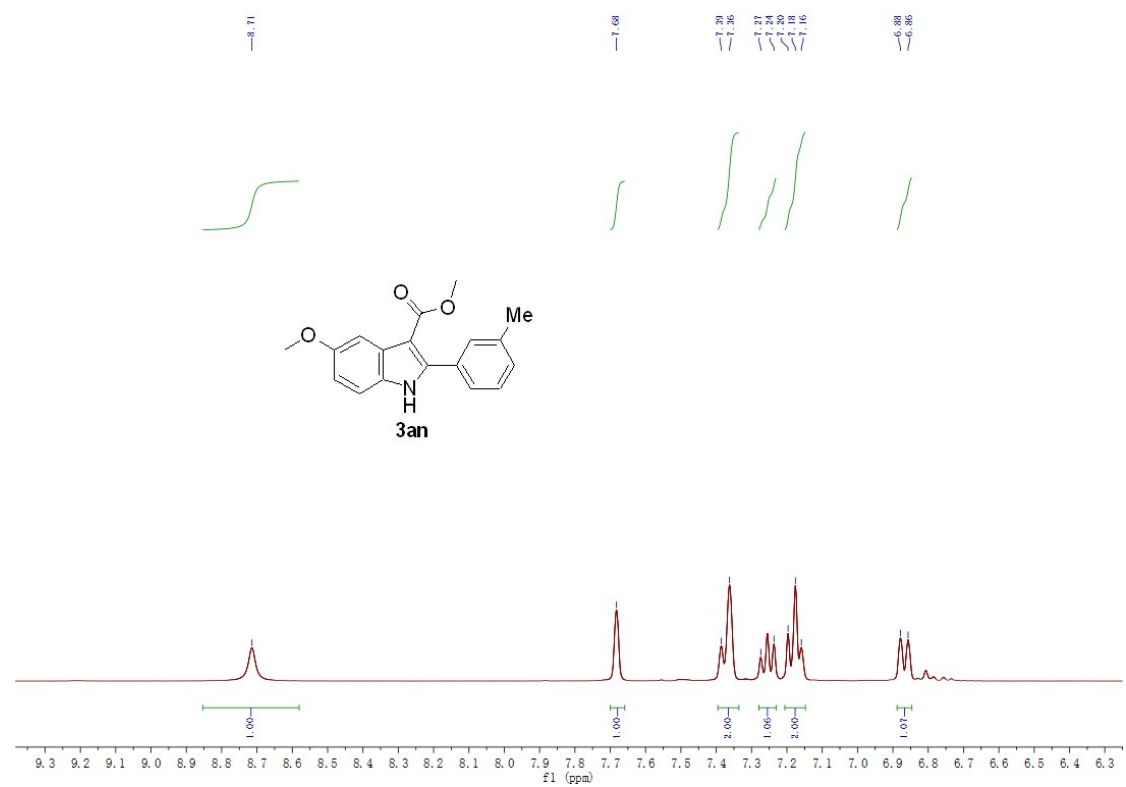

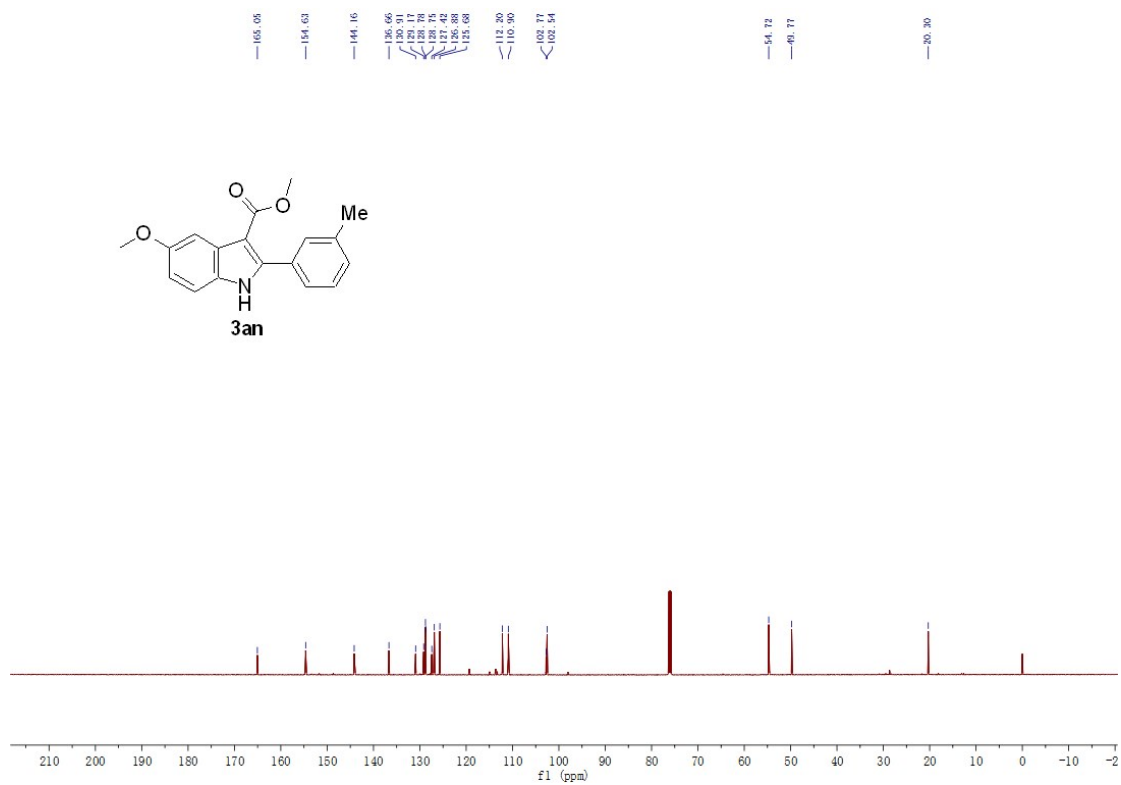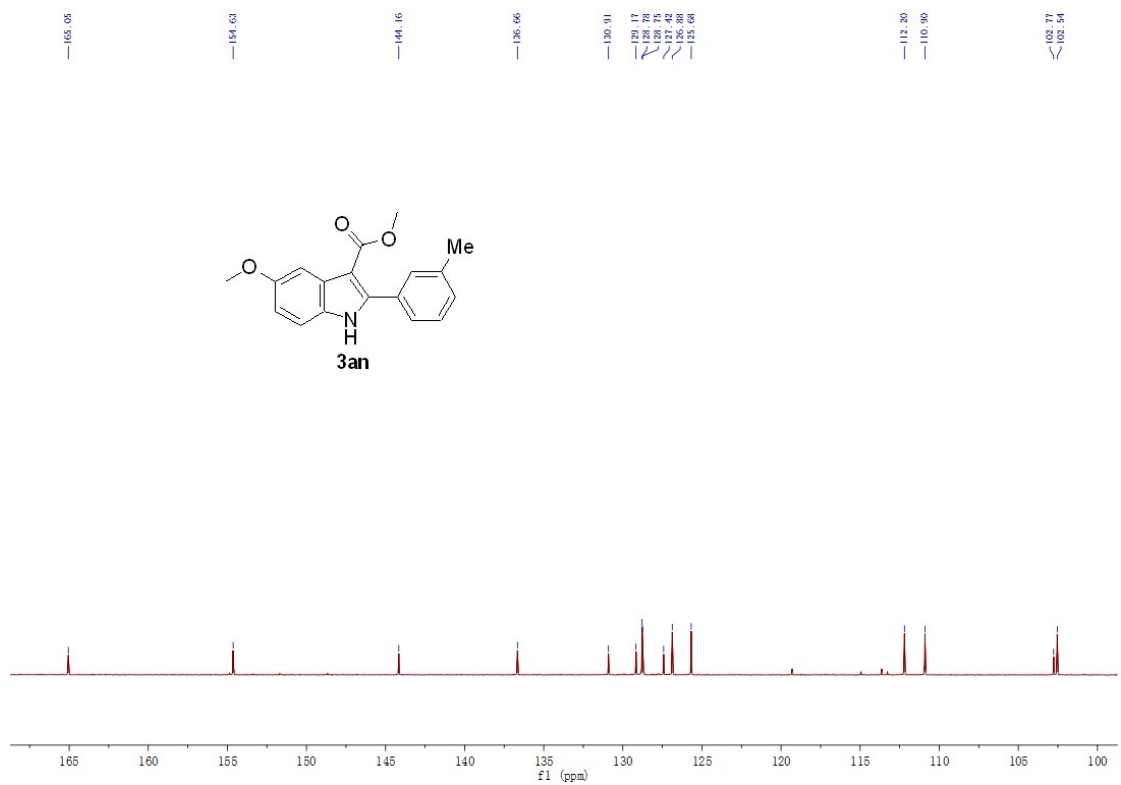

# Methyl 2-(3-methoxyphenyl)-5-methyl-1H-indole-3-carboxylate (3ao)

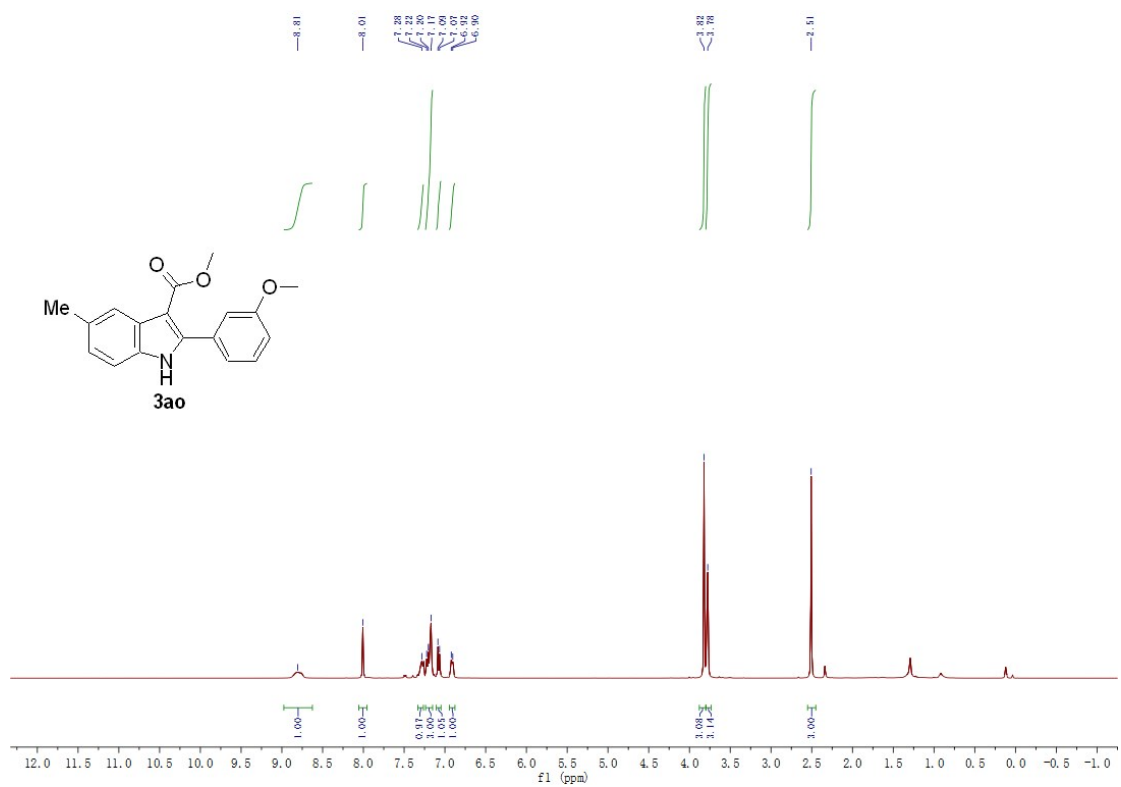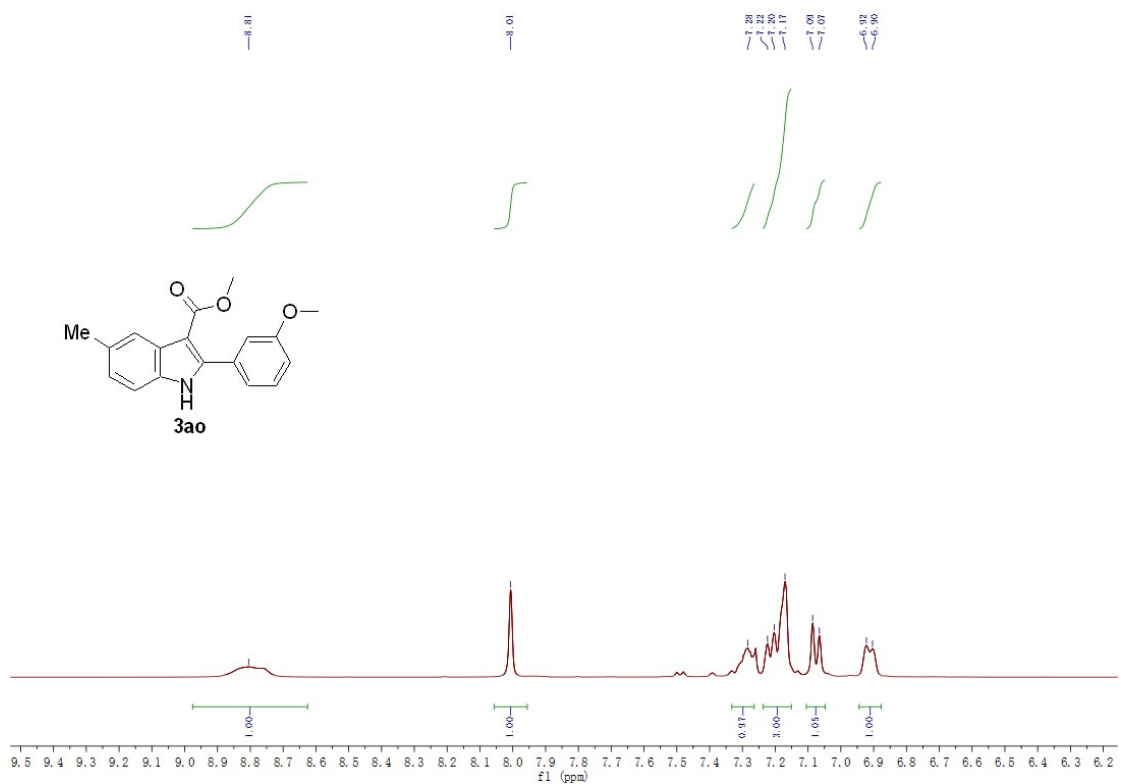

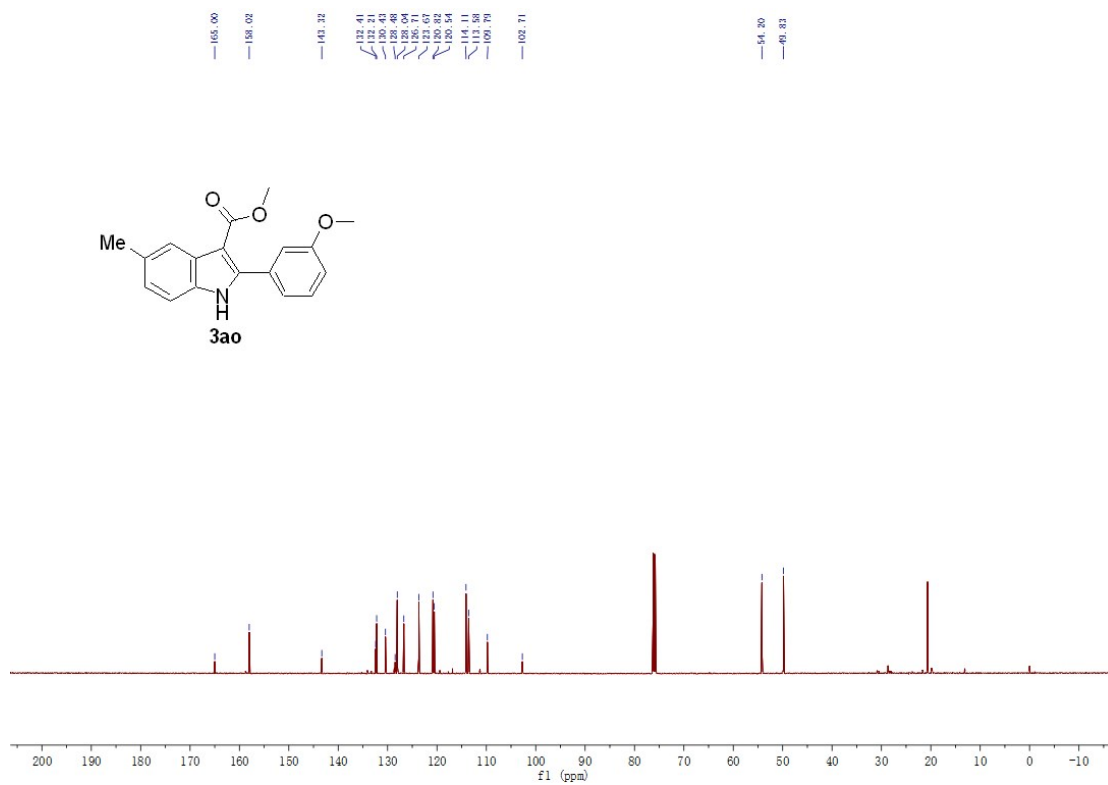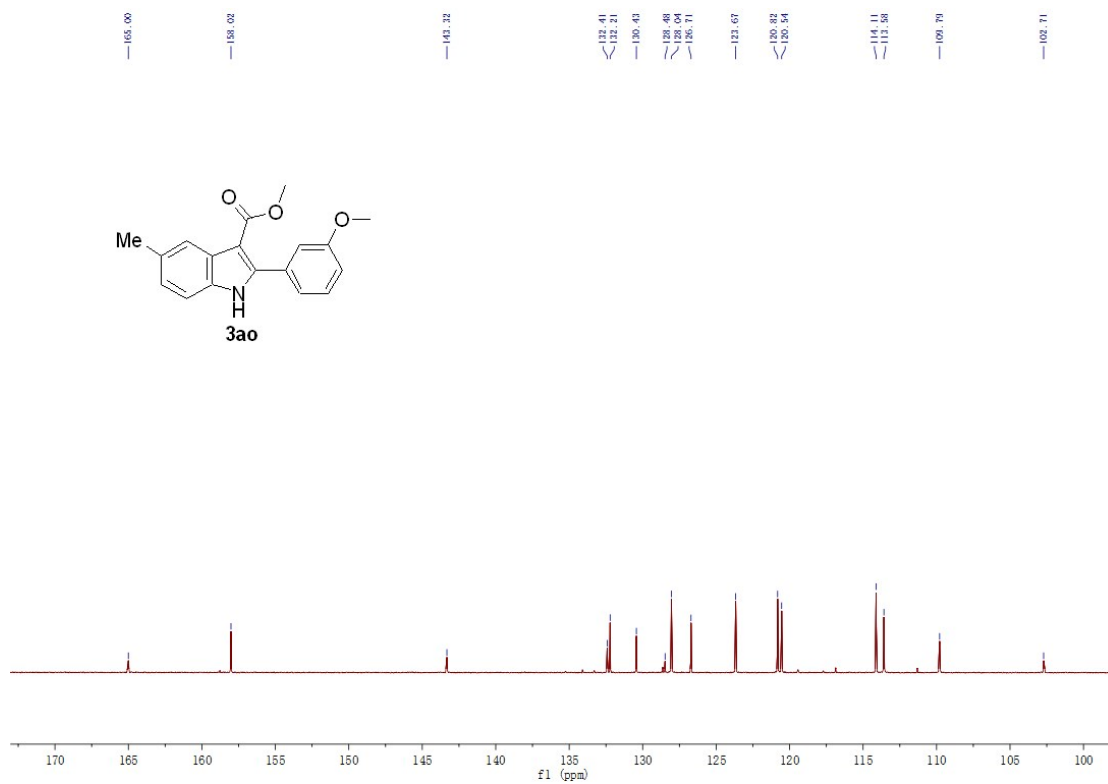

# Methyl 2-phenyl-1*H*-indole-3-carboxylate (3ap)

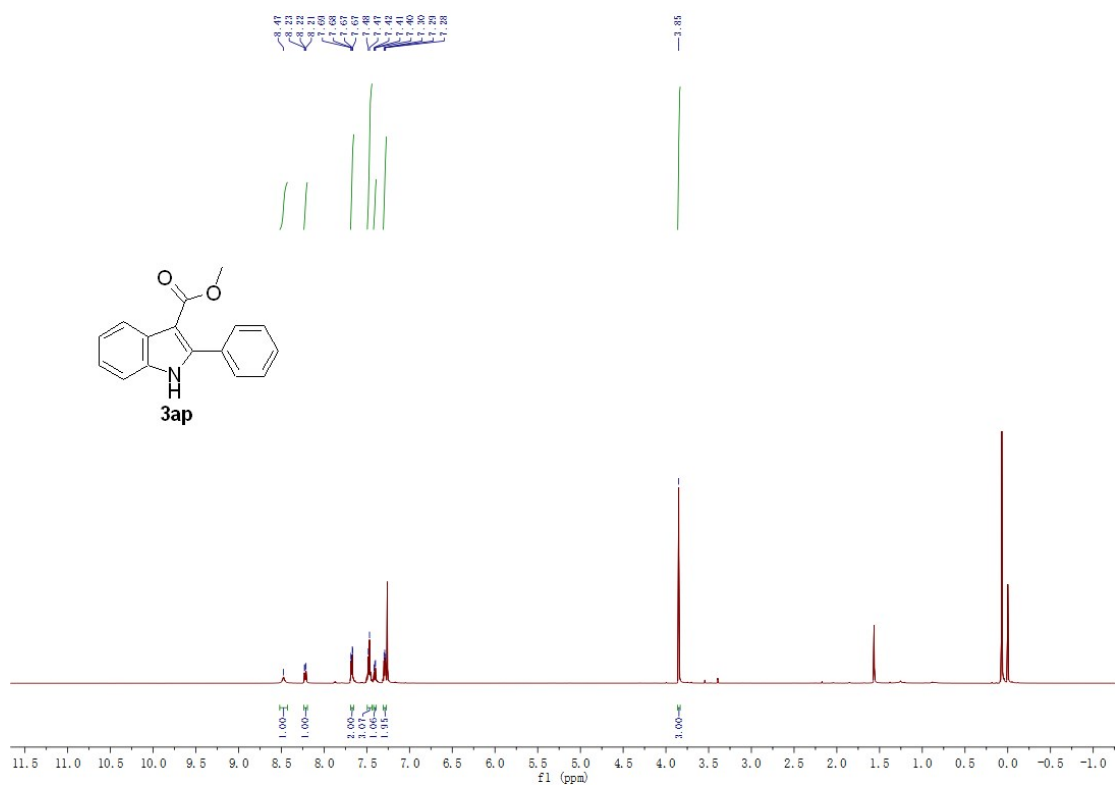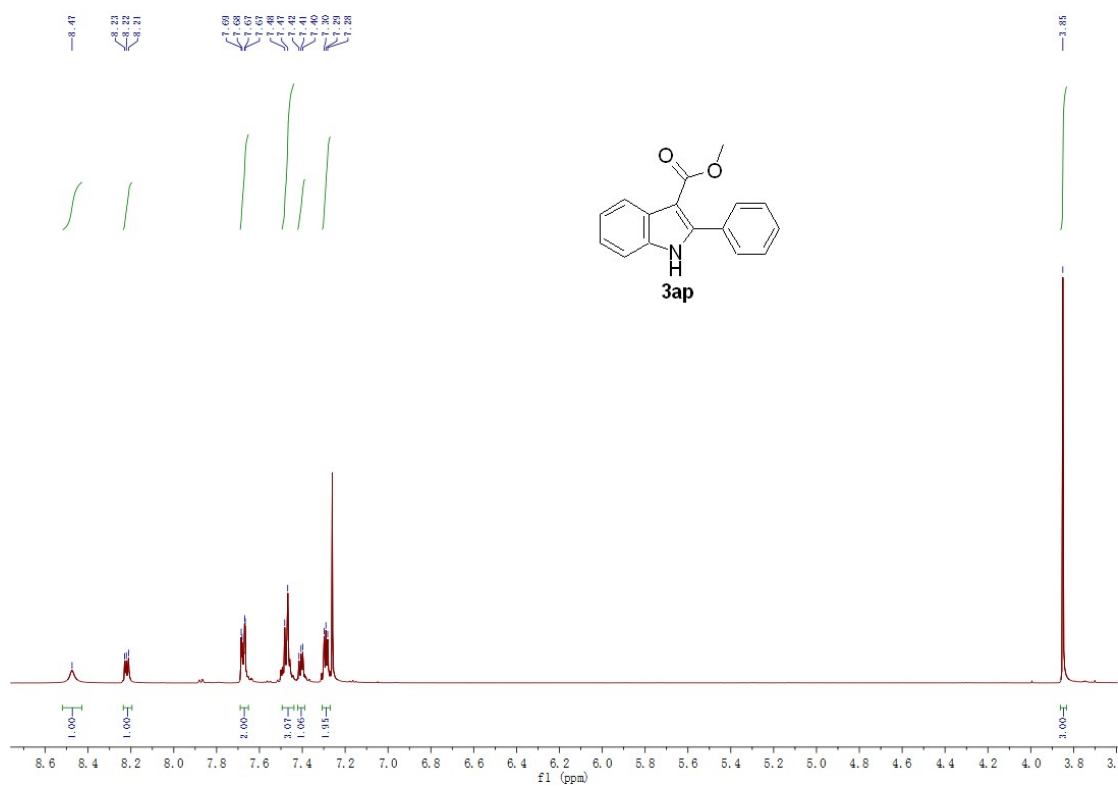



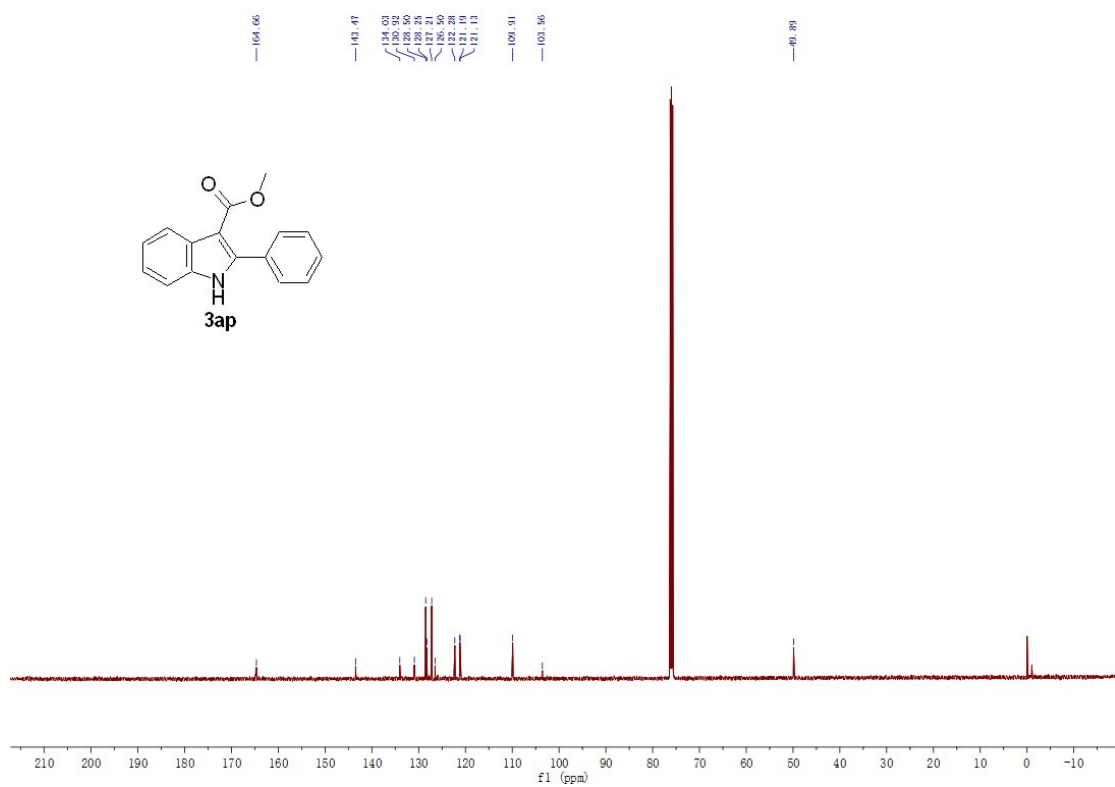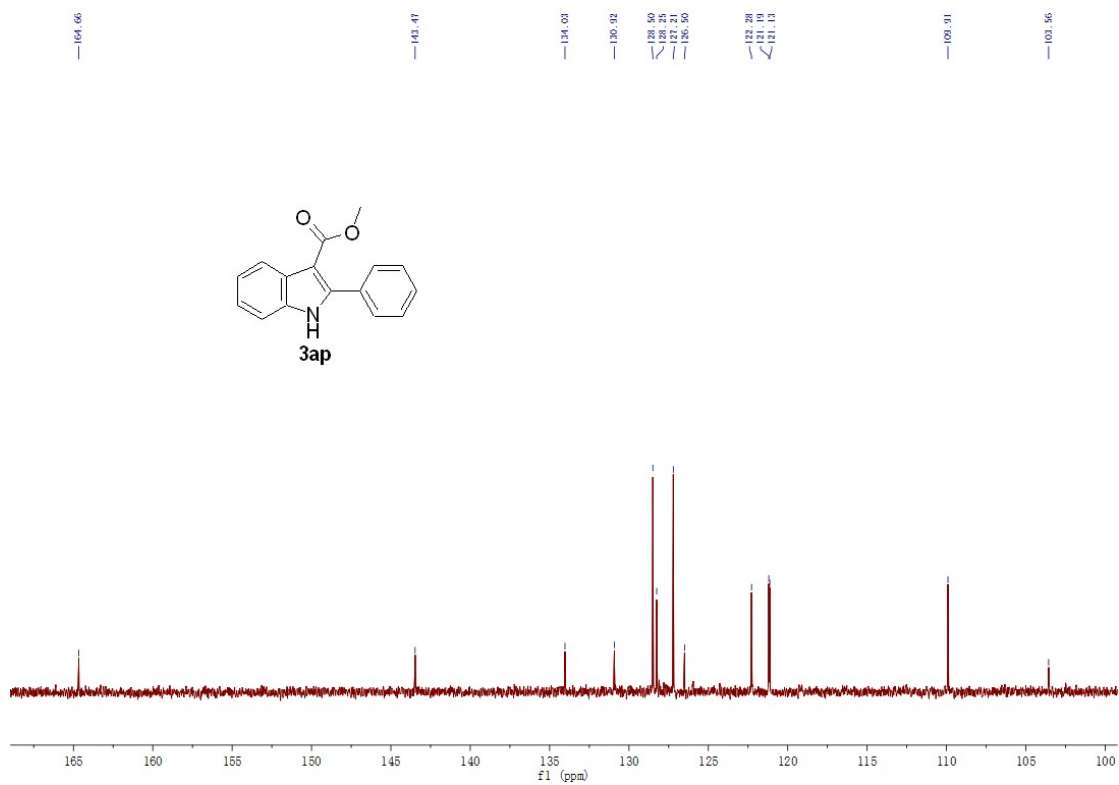

# Methyl 5-methyl-2-phenyl-1H-indole-3-carboxylate (3ba)

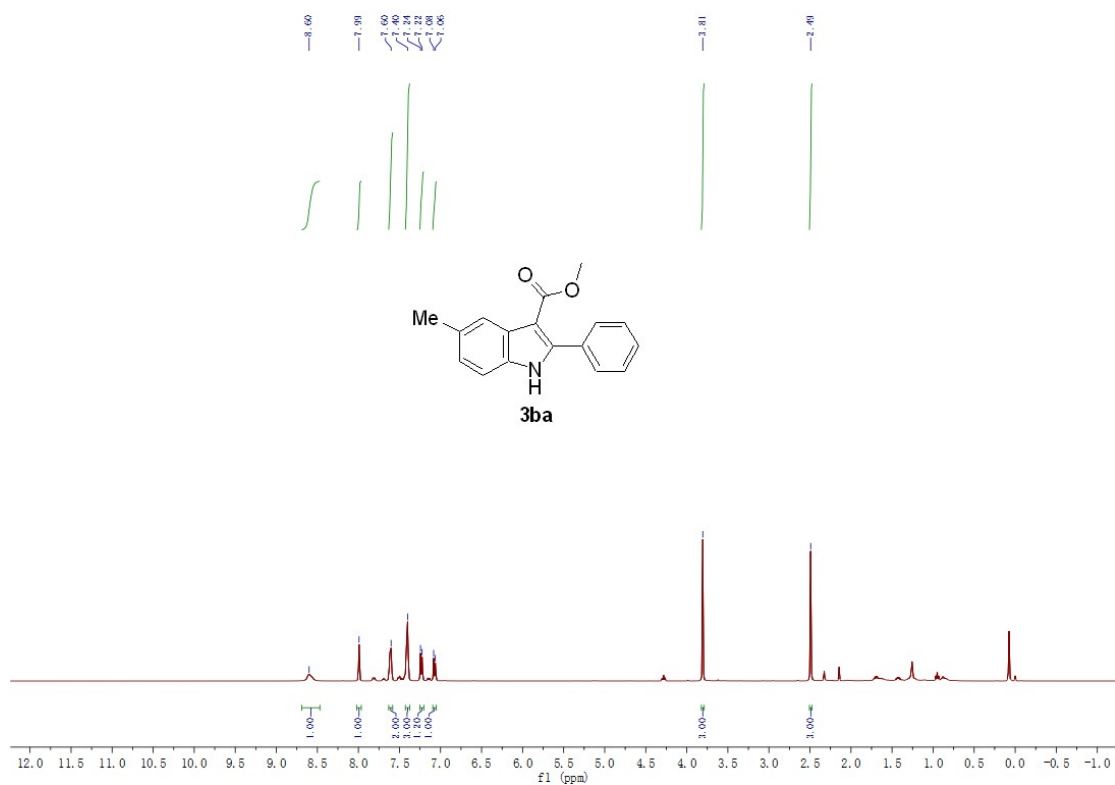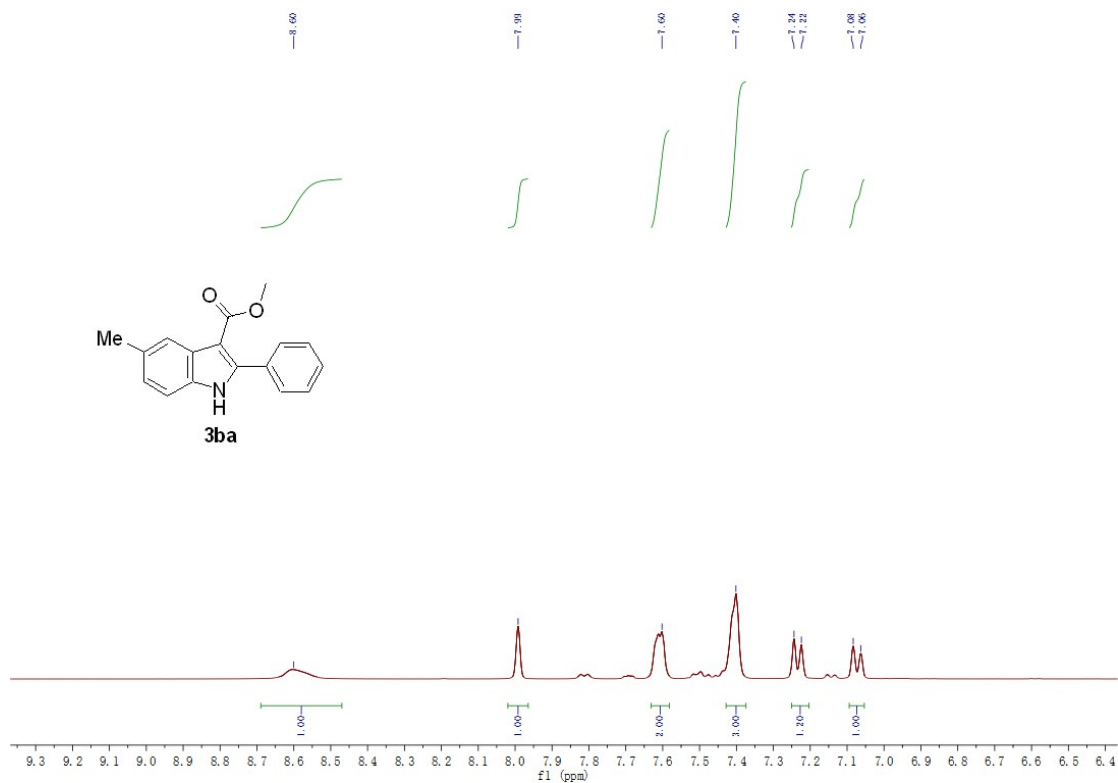

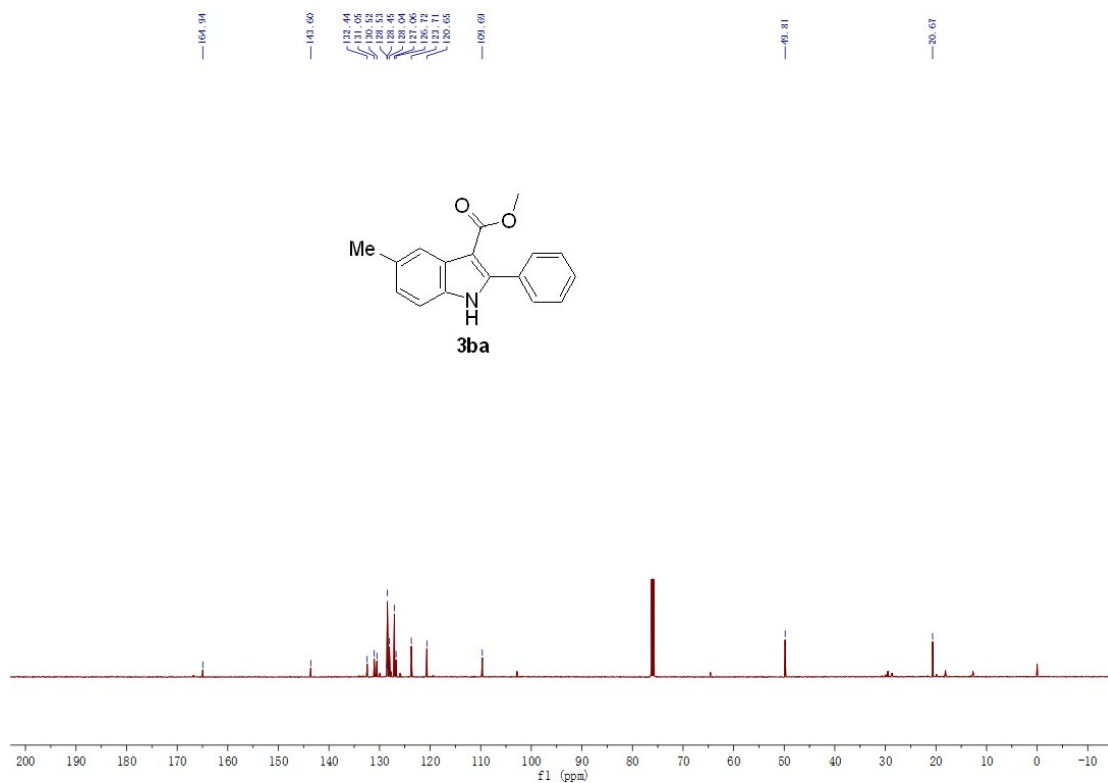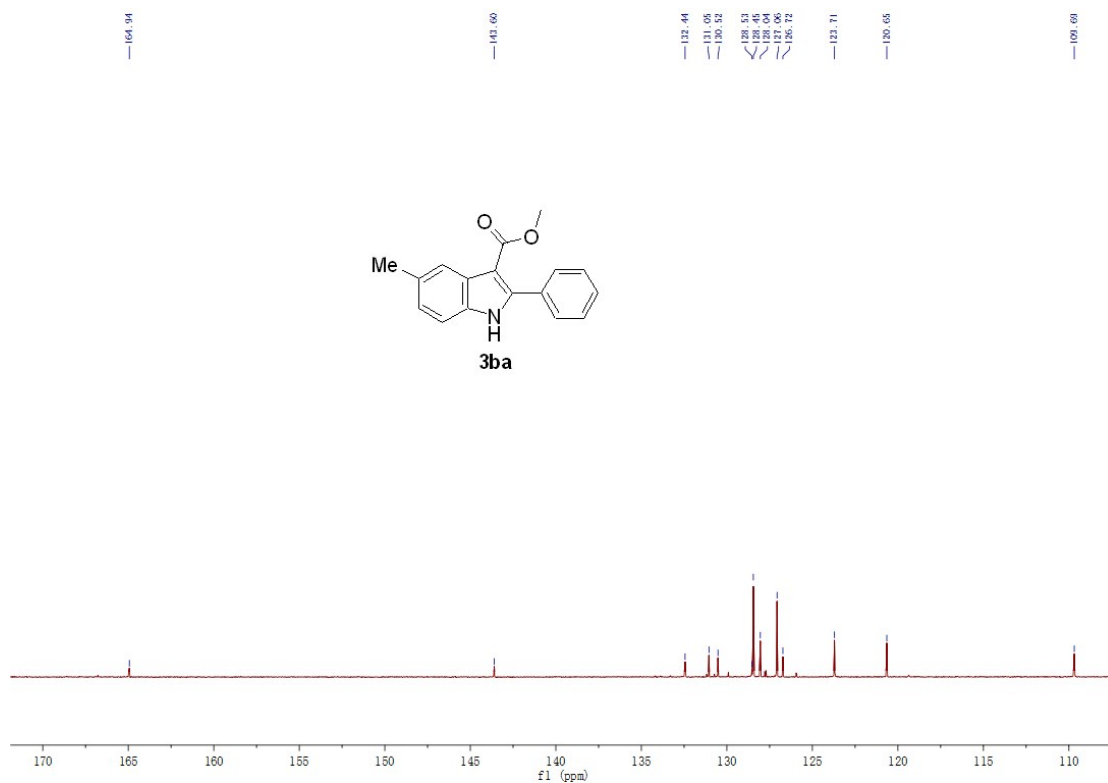

# Methyl 5-methoxy-2-phenyl-1H-indole-3-carboxylate (3ca)

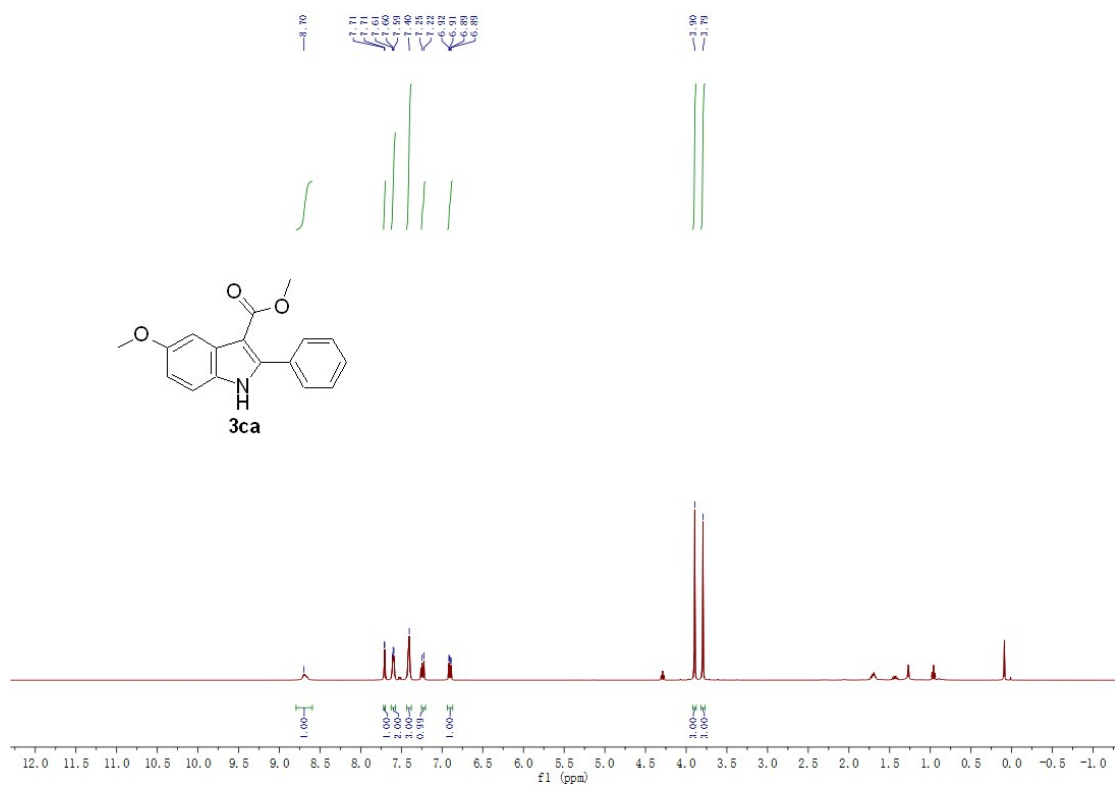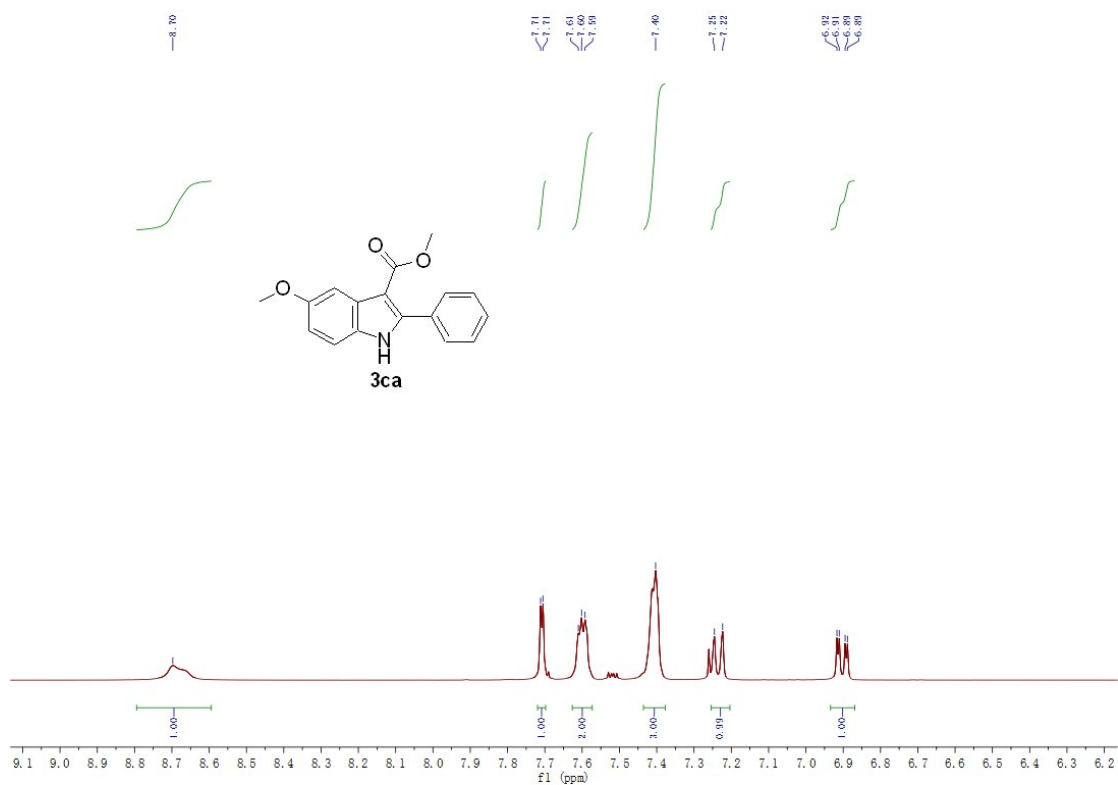

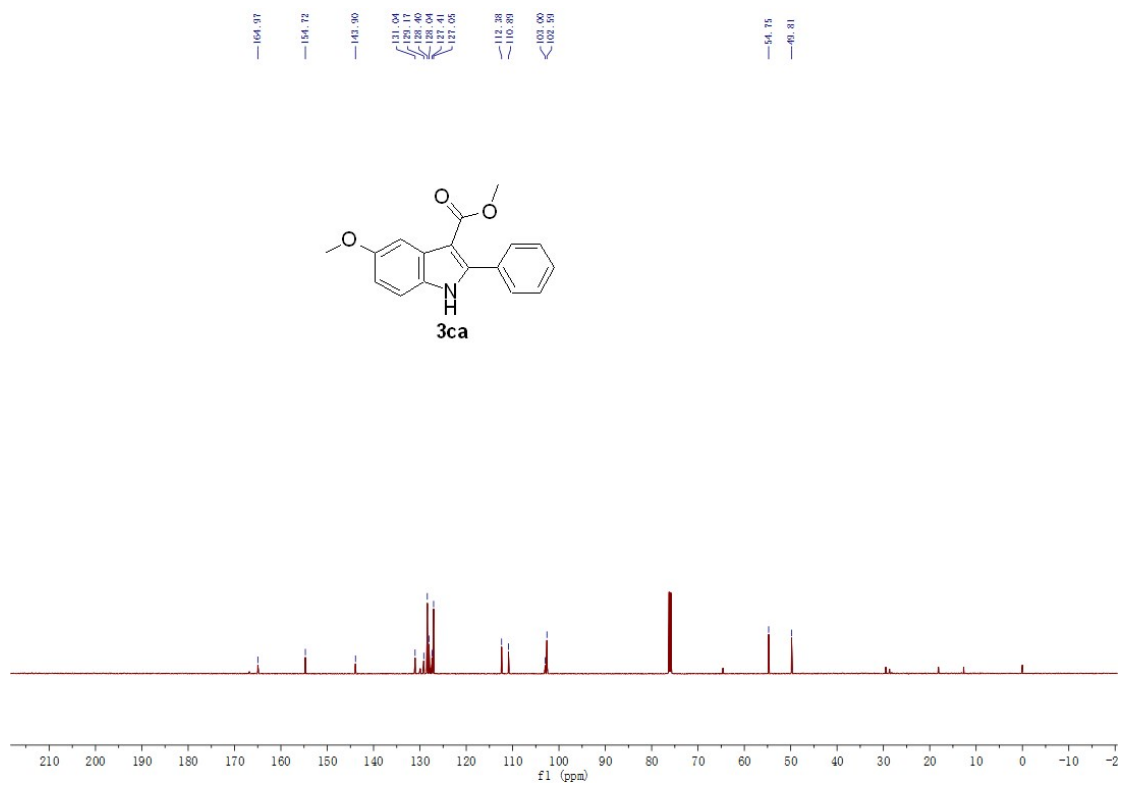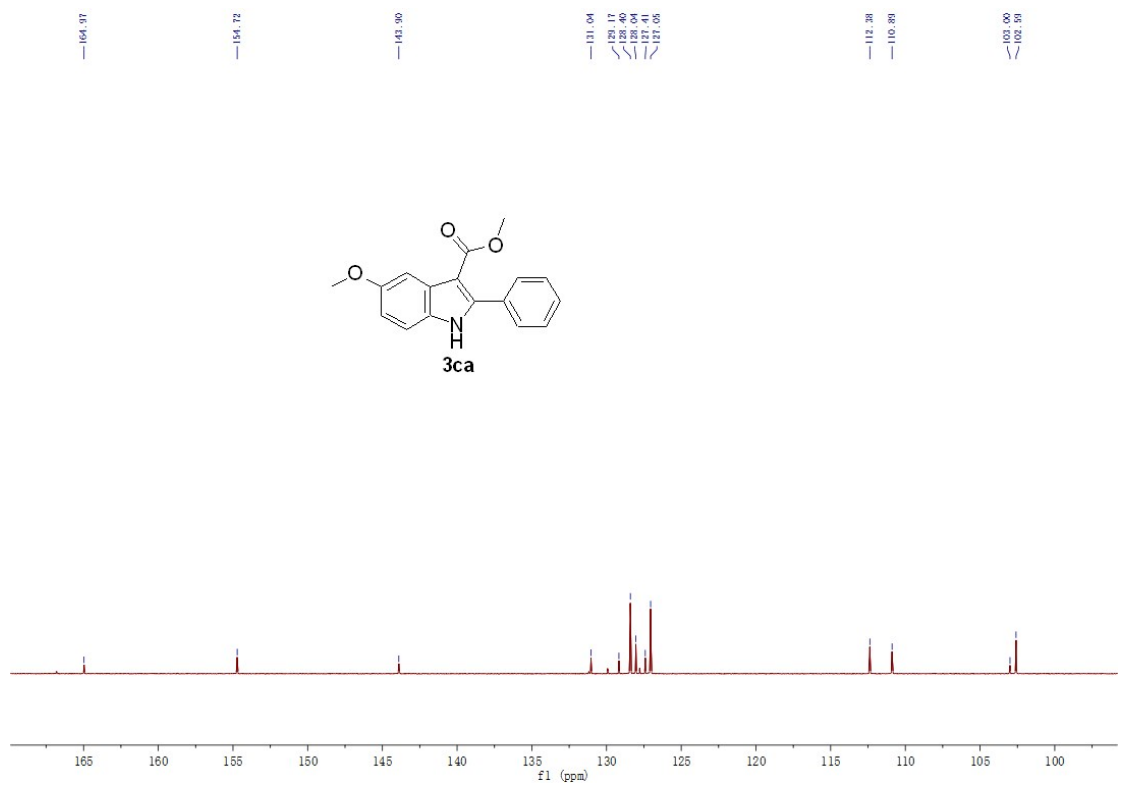

# Methyl 5-fluoro-2-phenyl-1H-indole-3-carboxylate (3da)

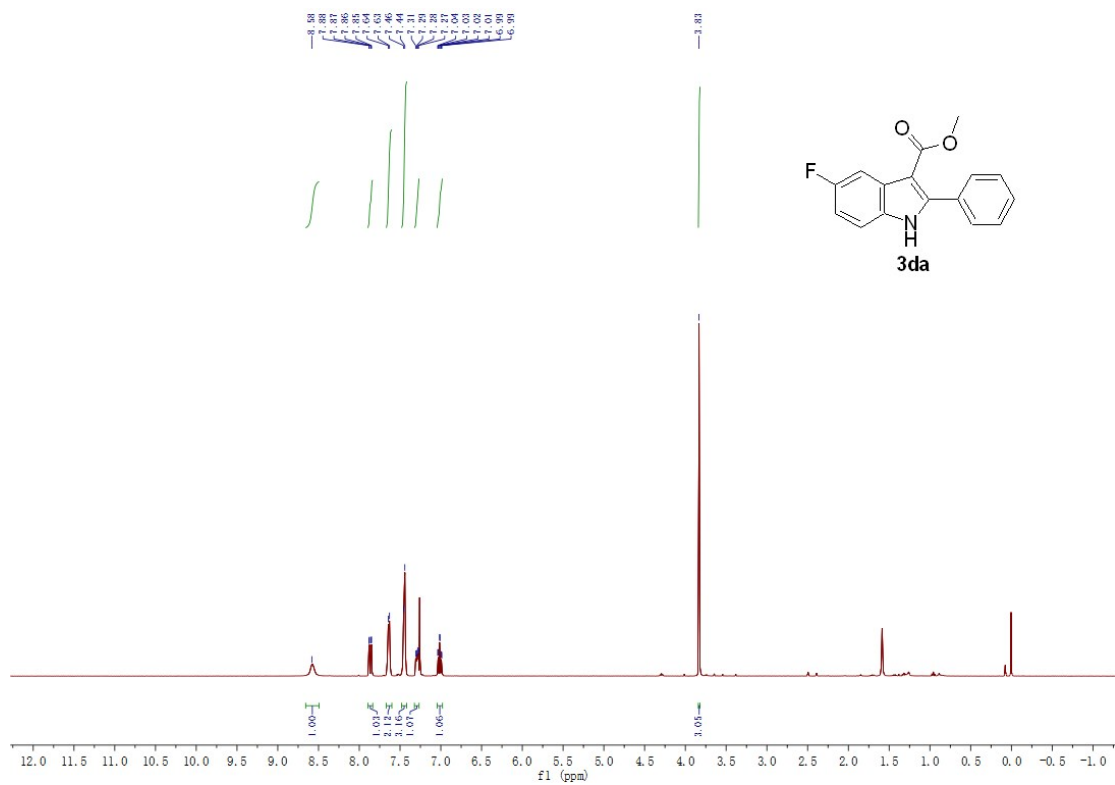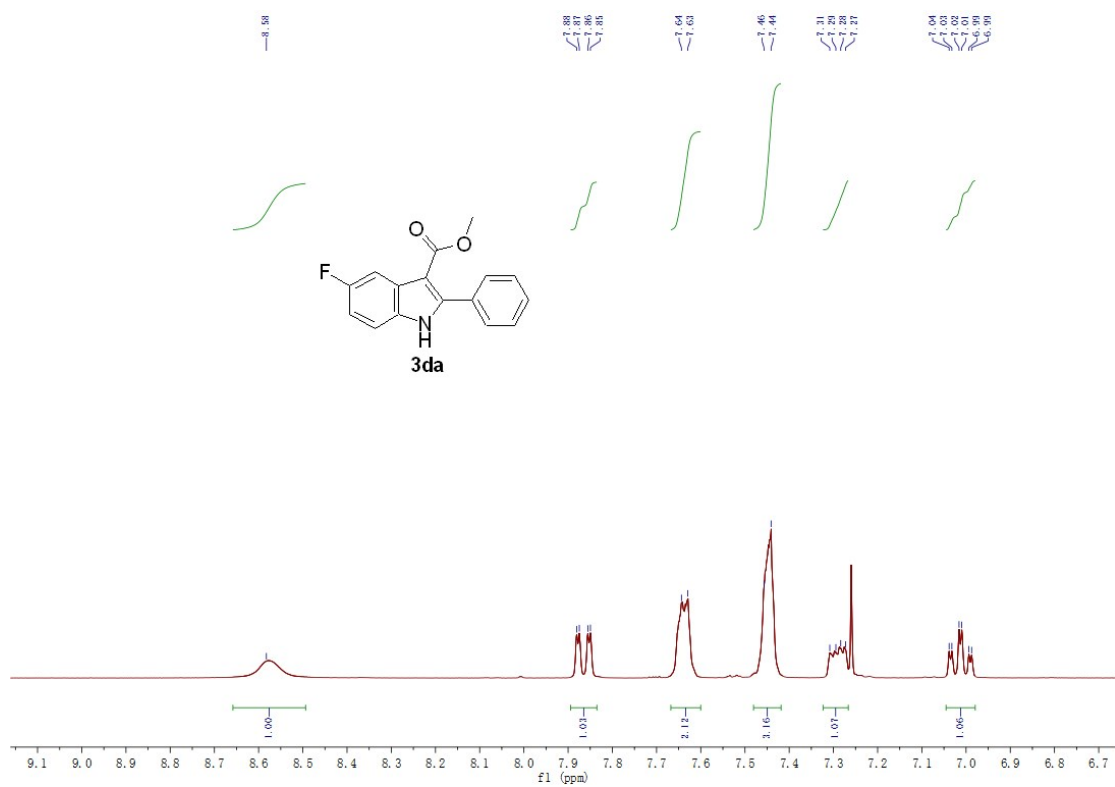

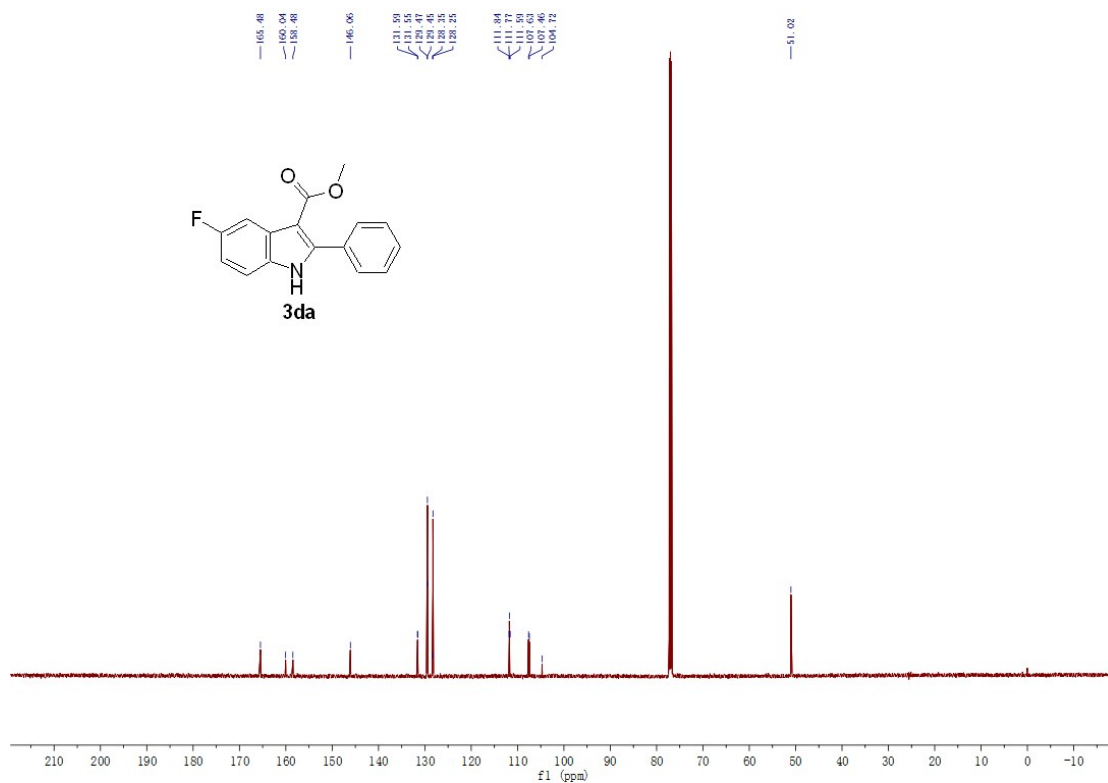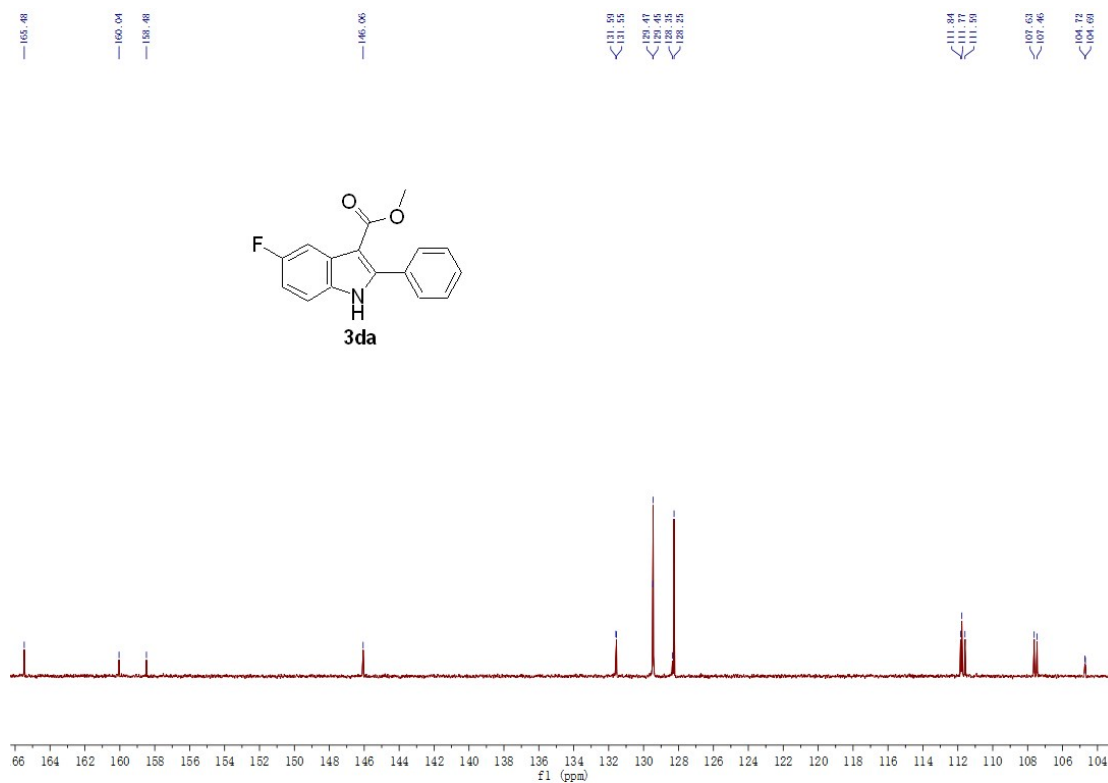

# Ethyl 5-chloro-2-(*p*-tolyl)-1*H*-indole-3-carboxylate (**3ea**)

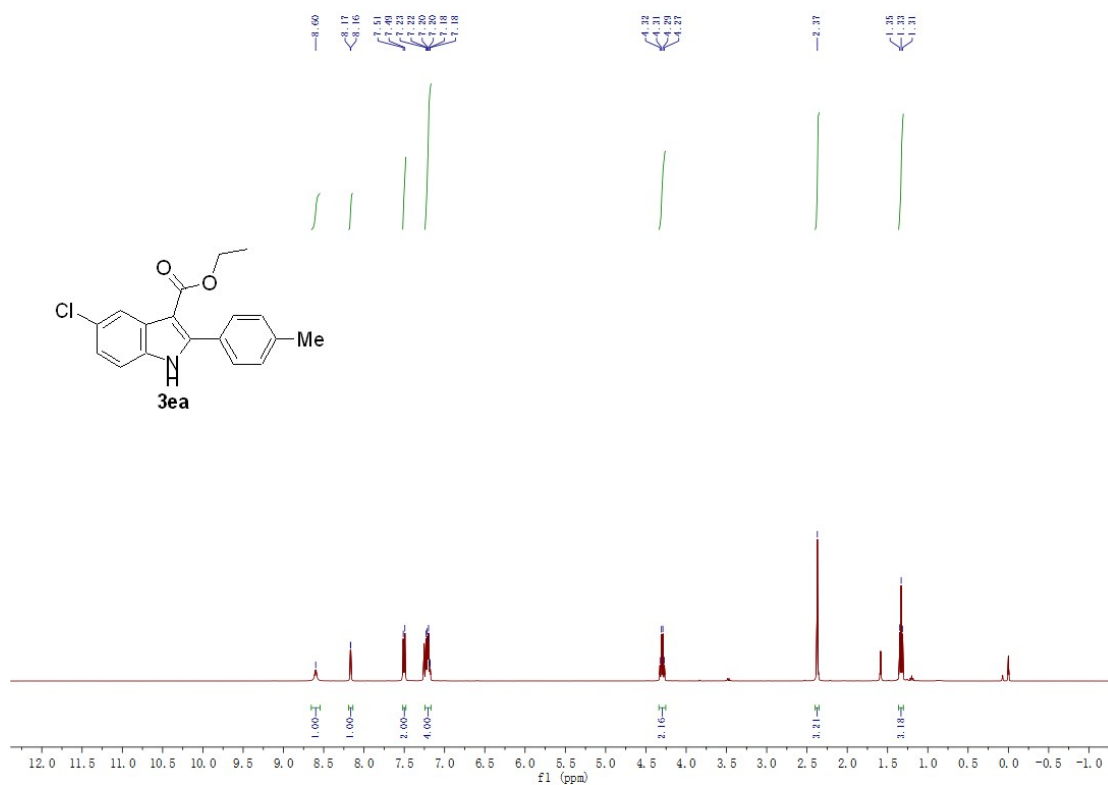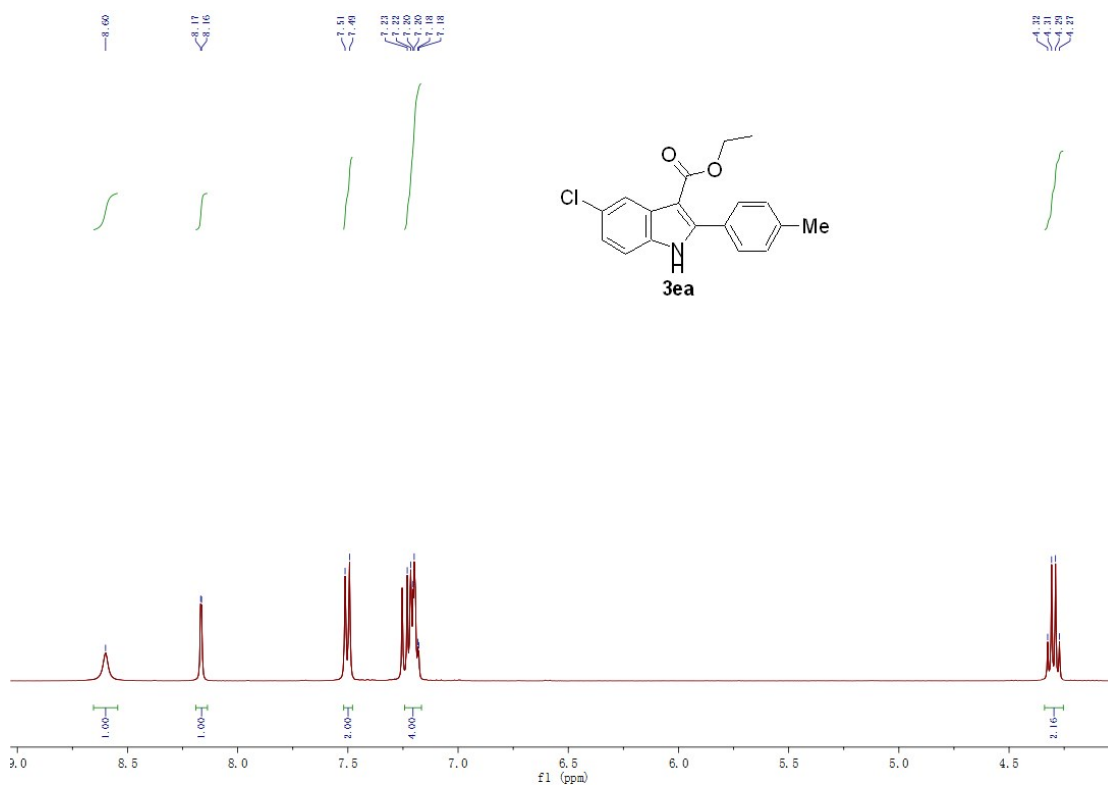



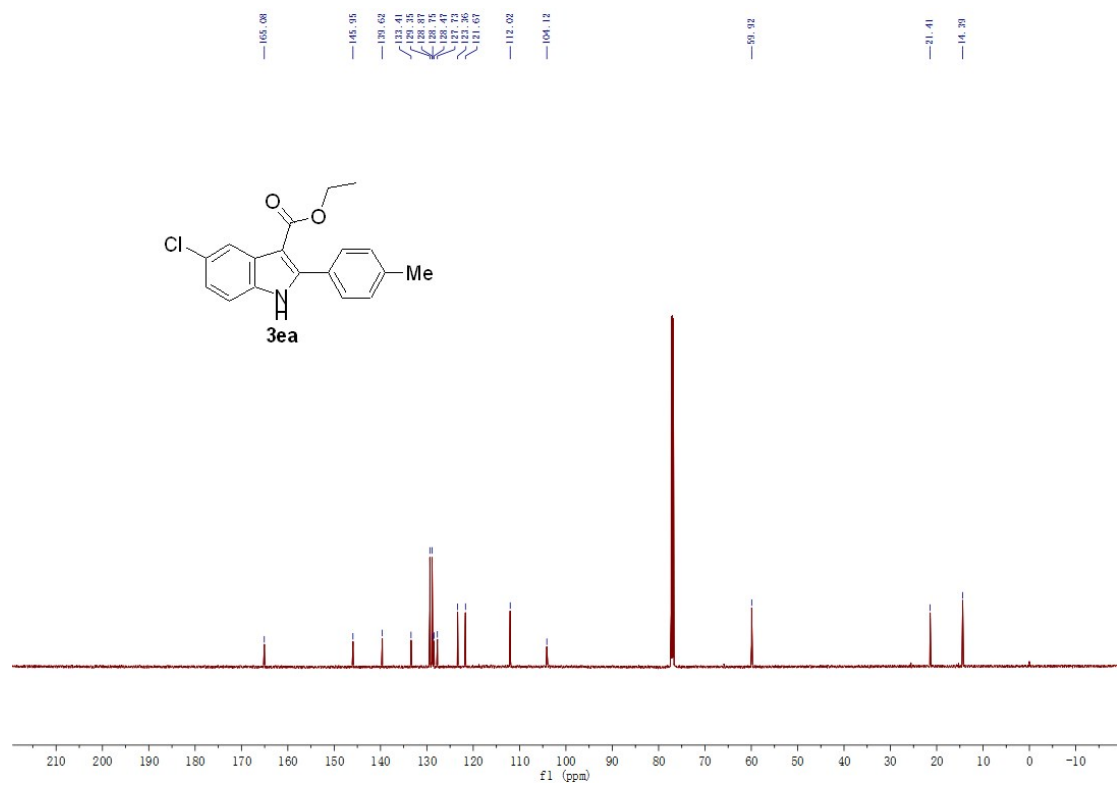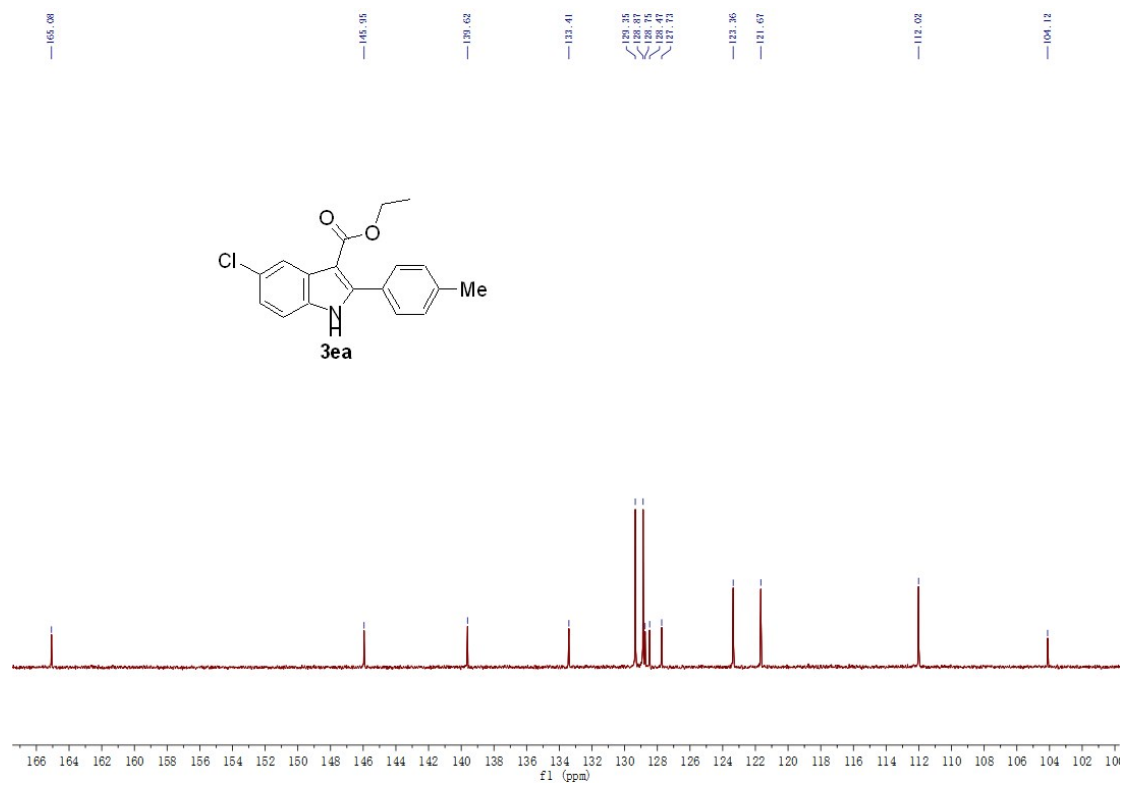

# Dimethyl 2-phenyl-1H-indole-3,5-dicarboxylate (3fa)

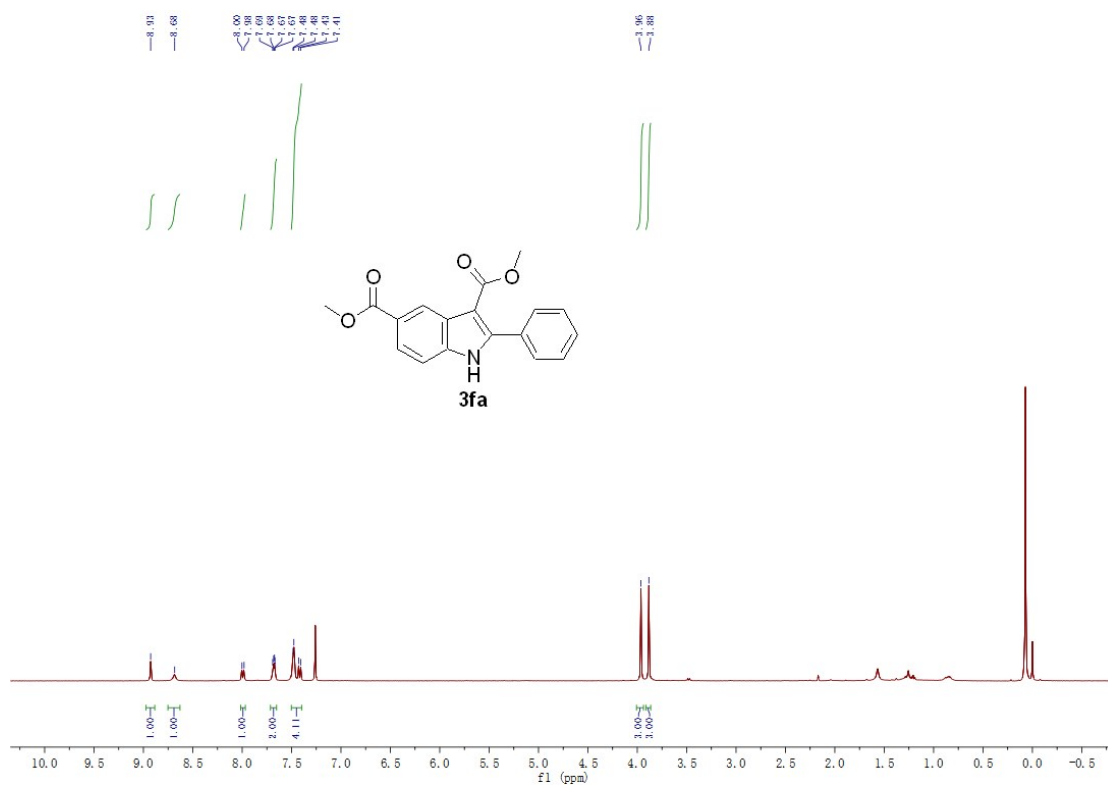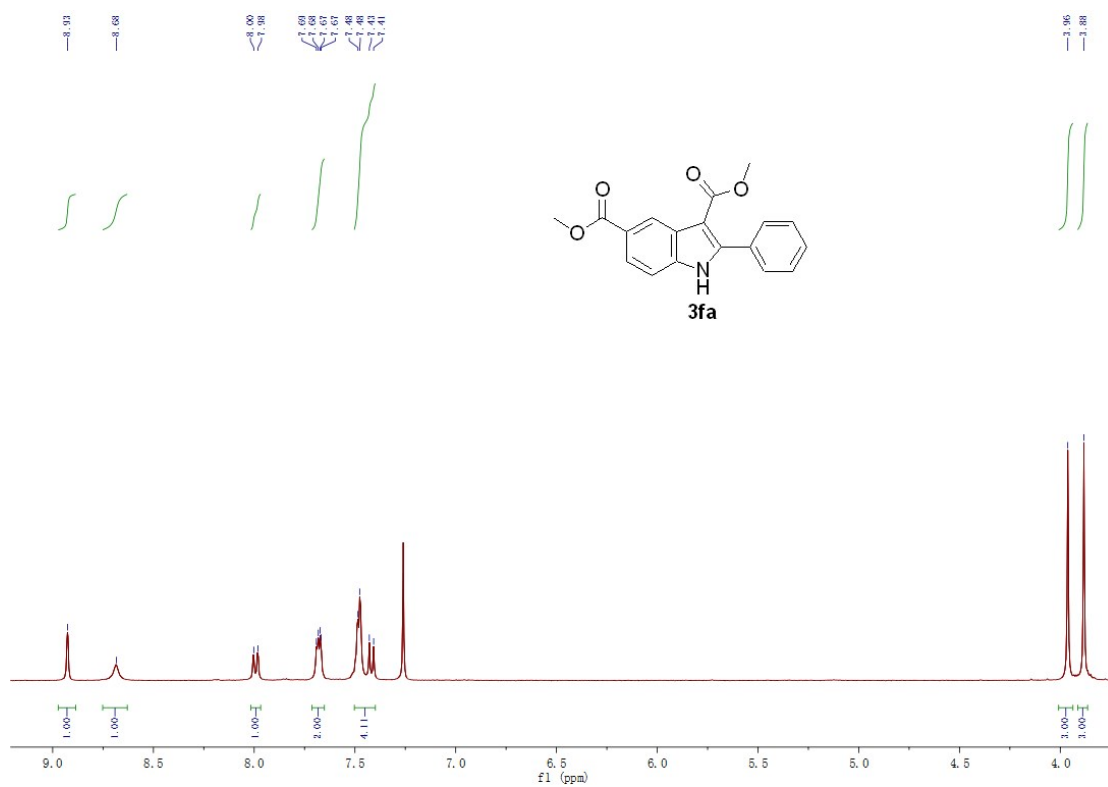

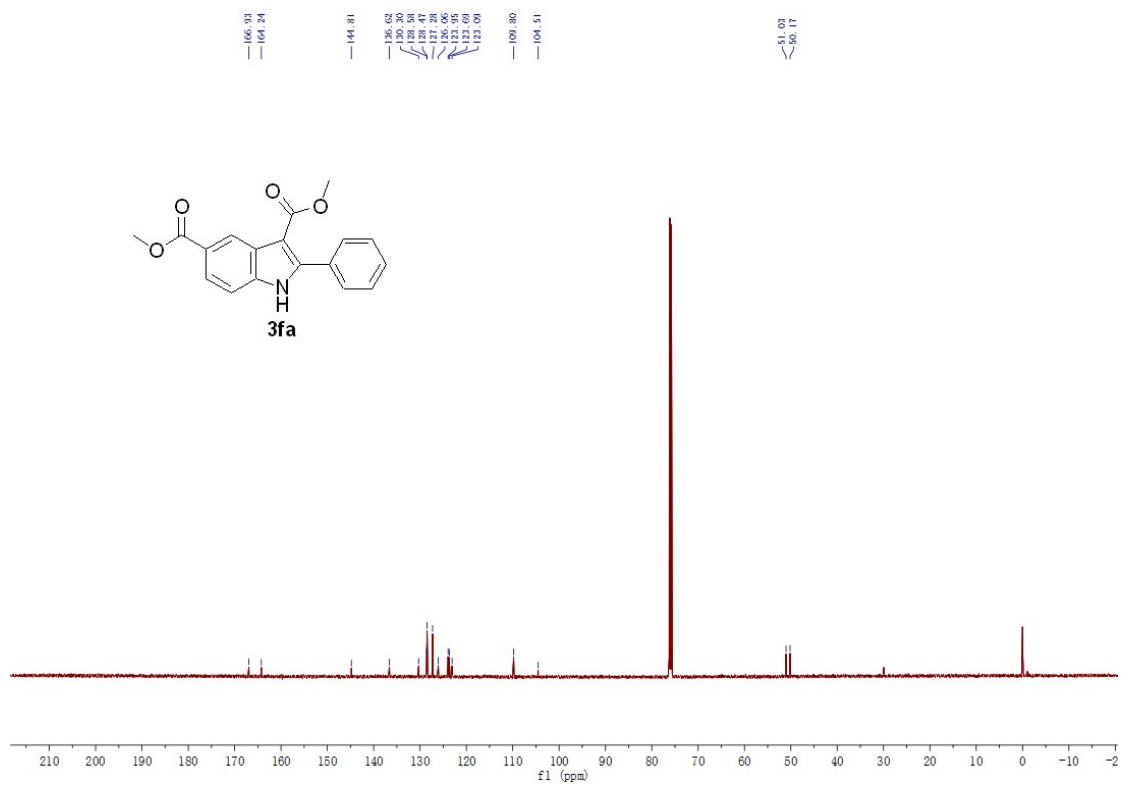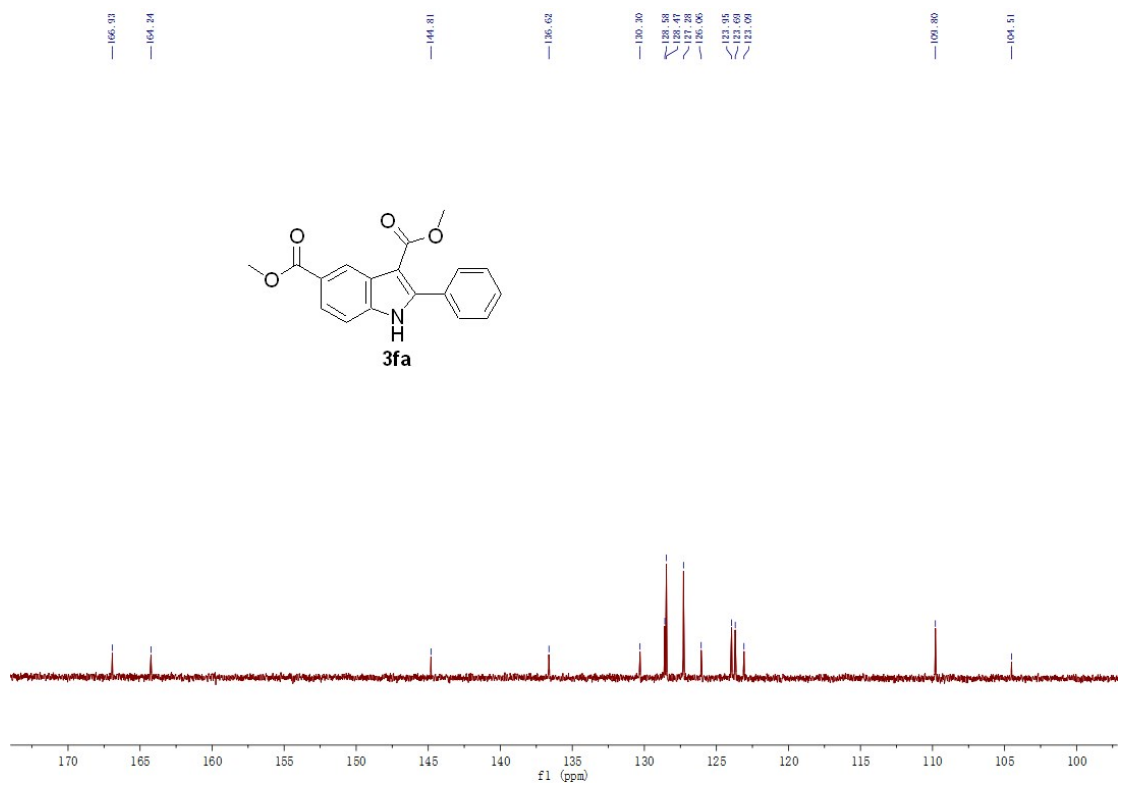

# Methyl 5-(methylthio)-2-phenyl-1H-indole-3-carboxylate (3ga)

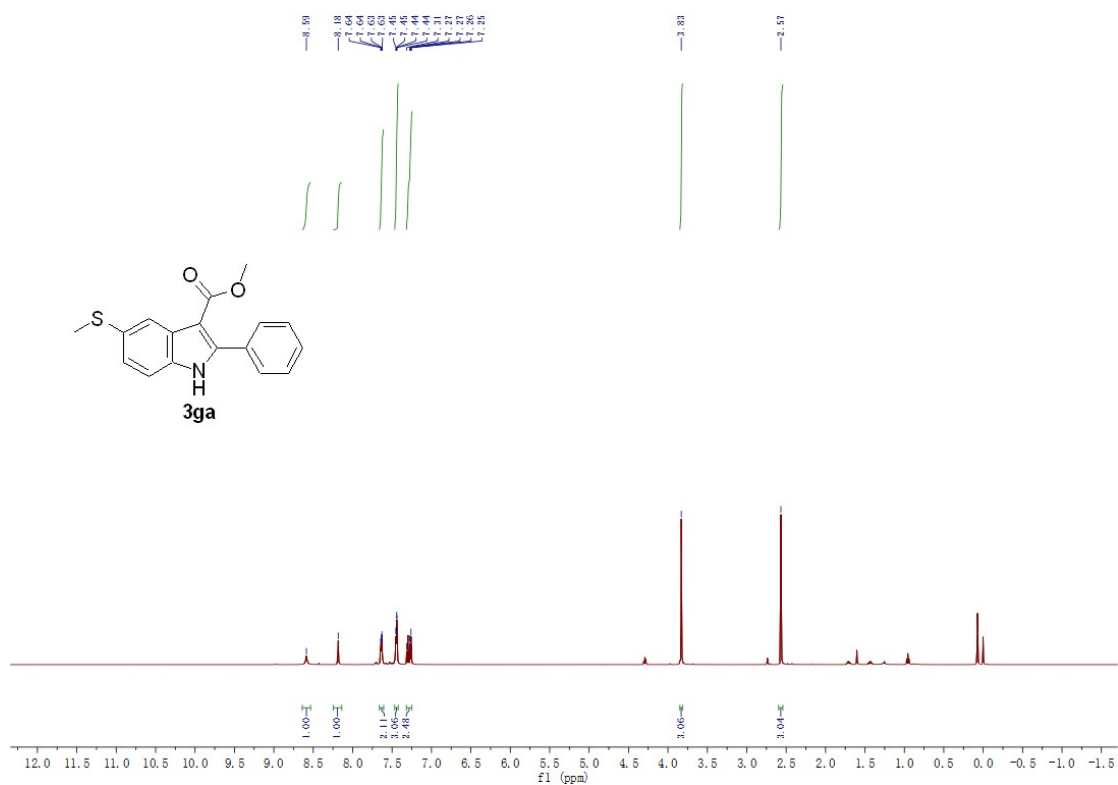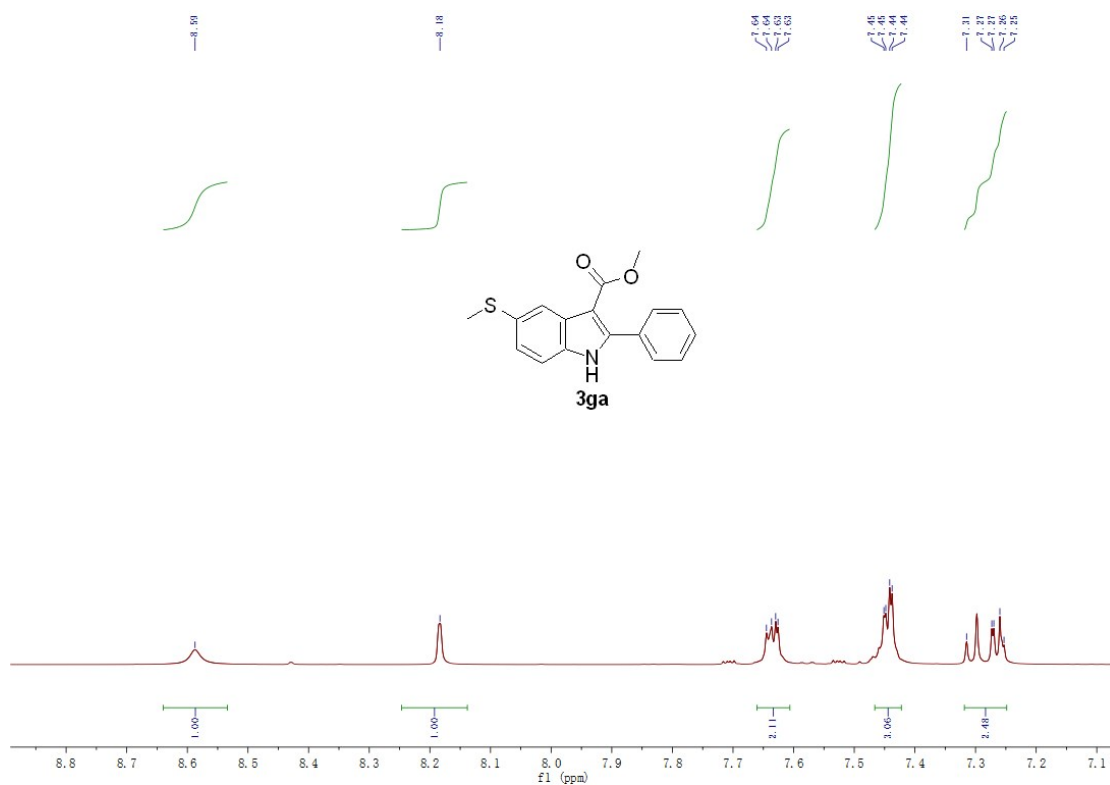

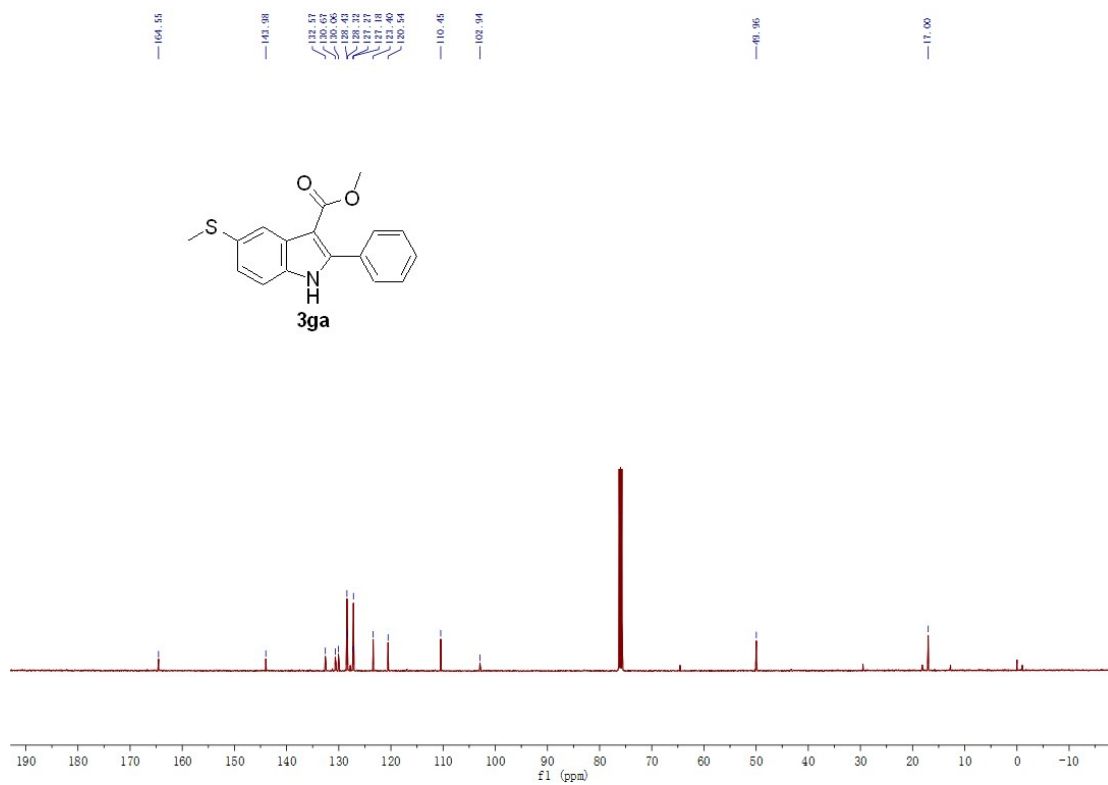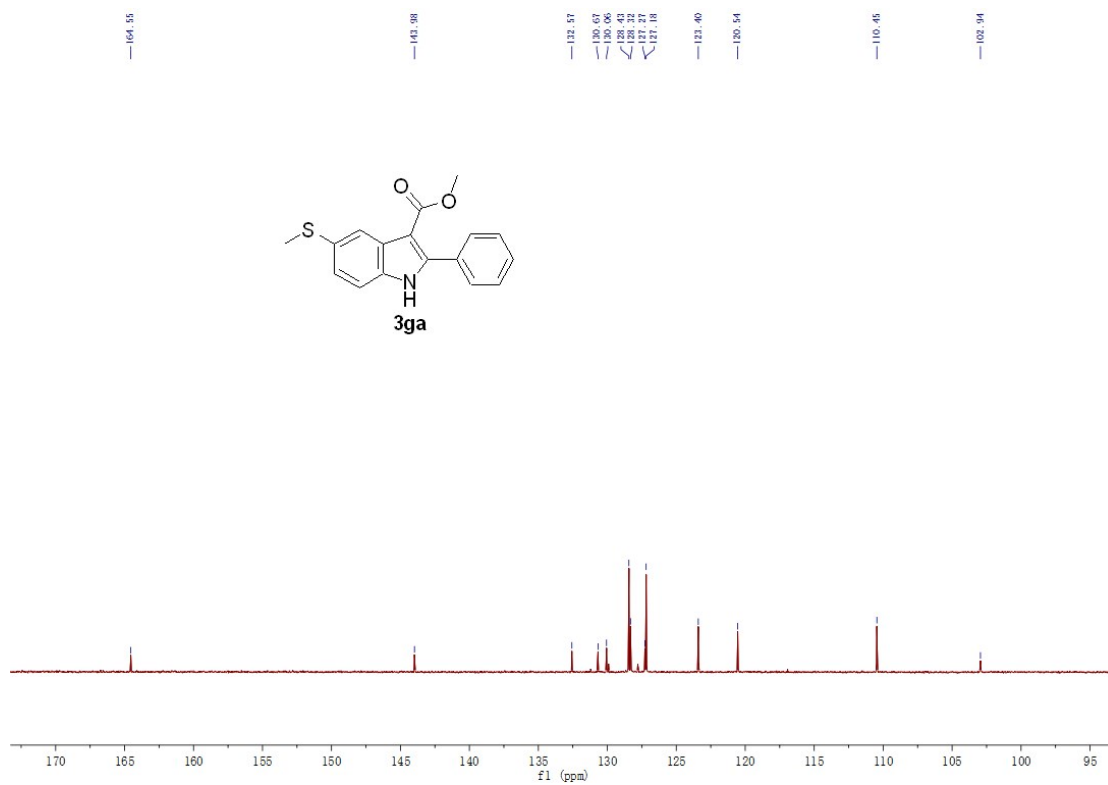

**Methyl 2-phenyl-1*H*-benzo[*g*]indole-3-carboxylate (3ha)**

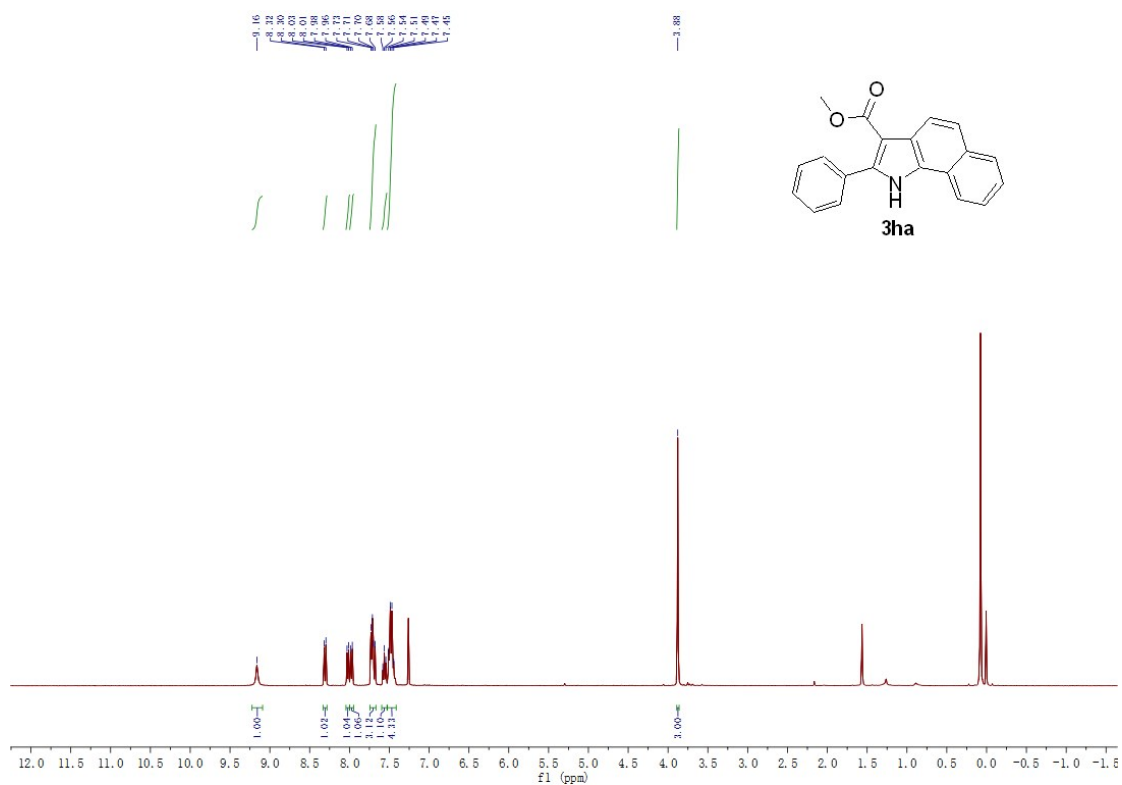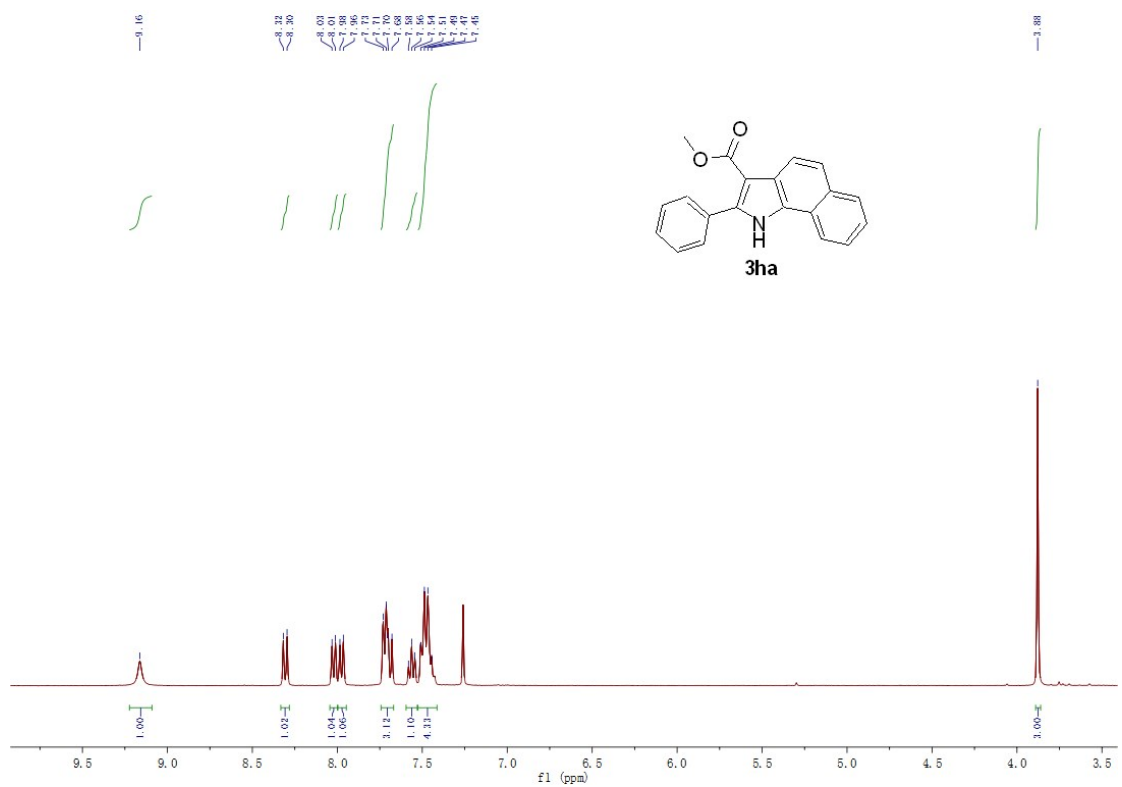

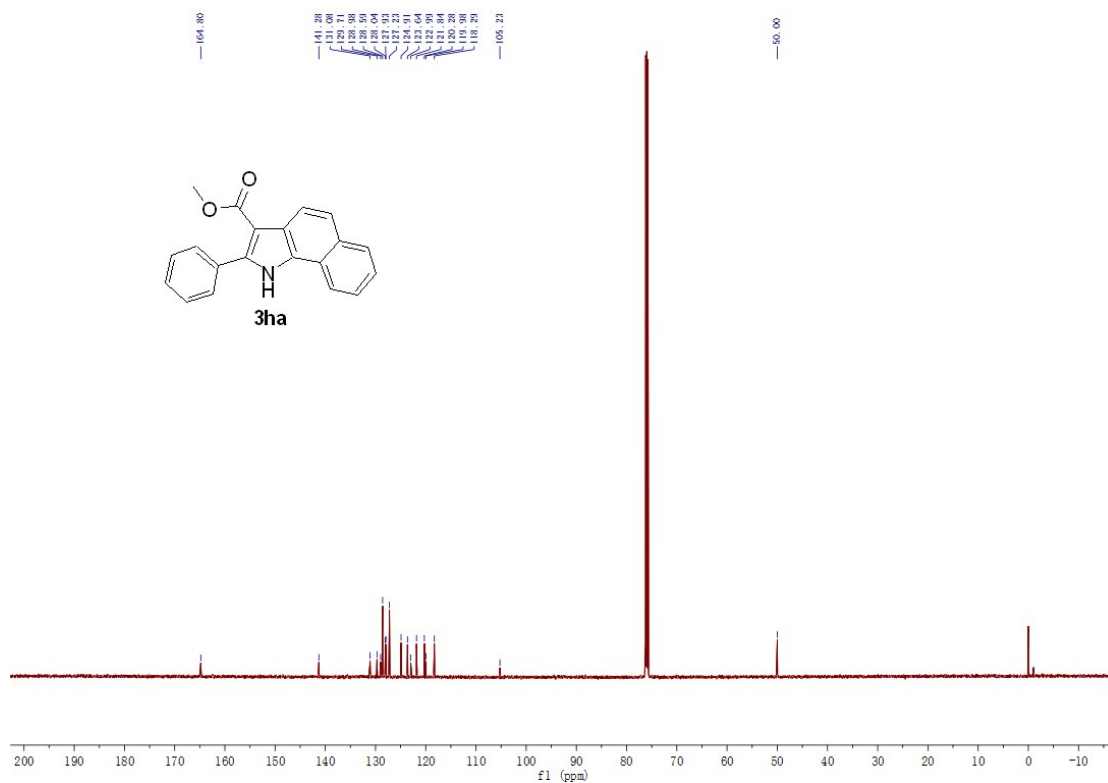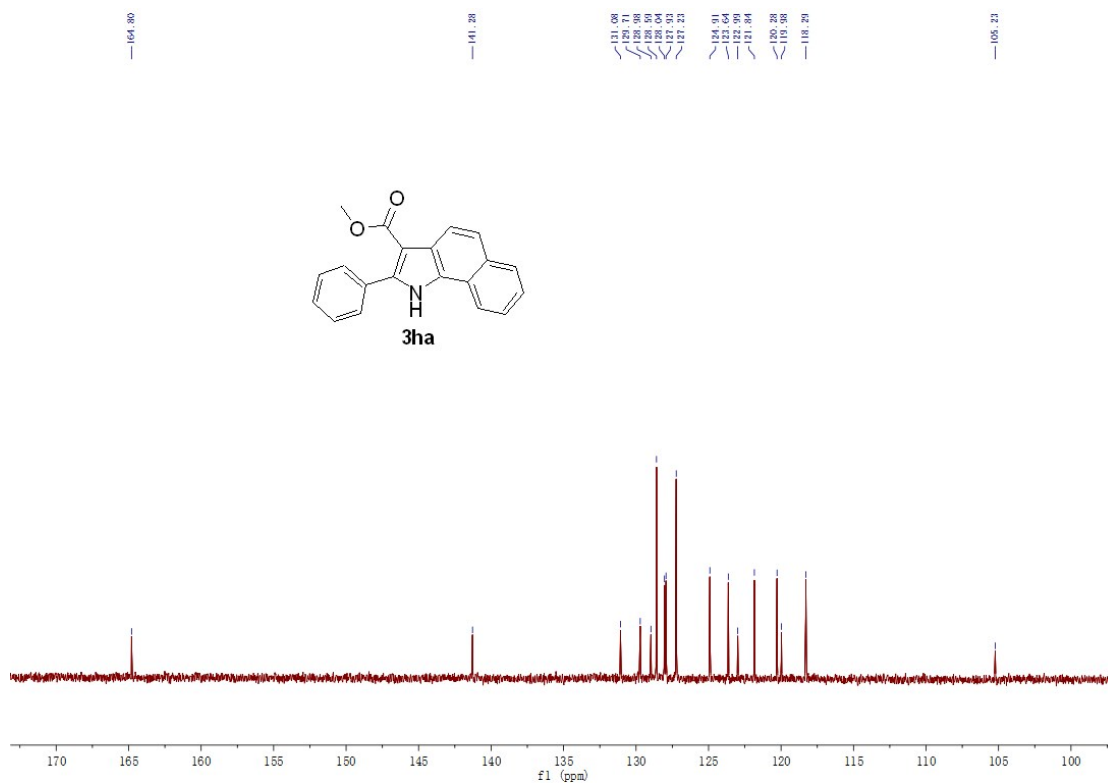

# Methyl 2-phenyl-3*H*-benzo[*e*]indole-1-carboxylate (**3ia**)

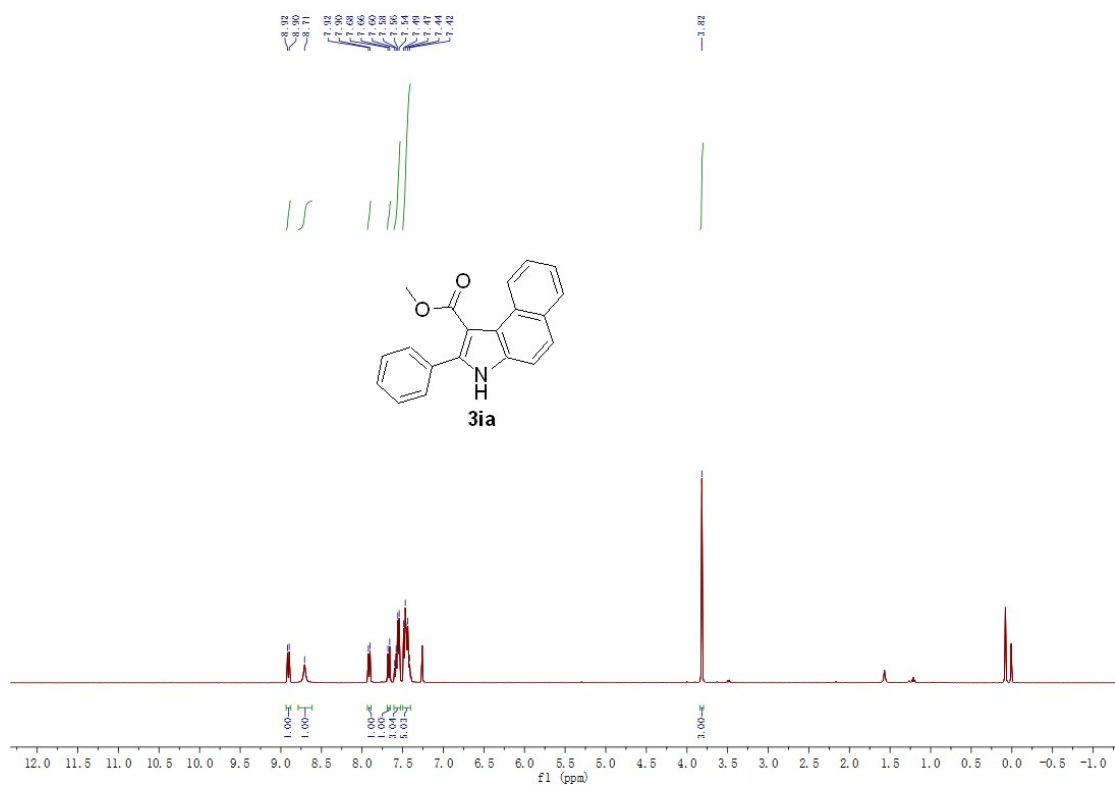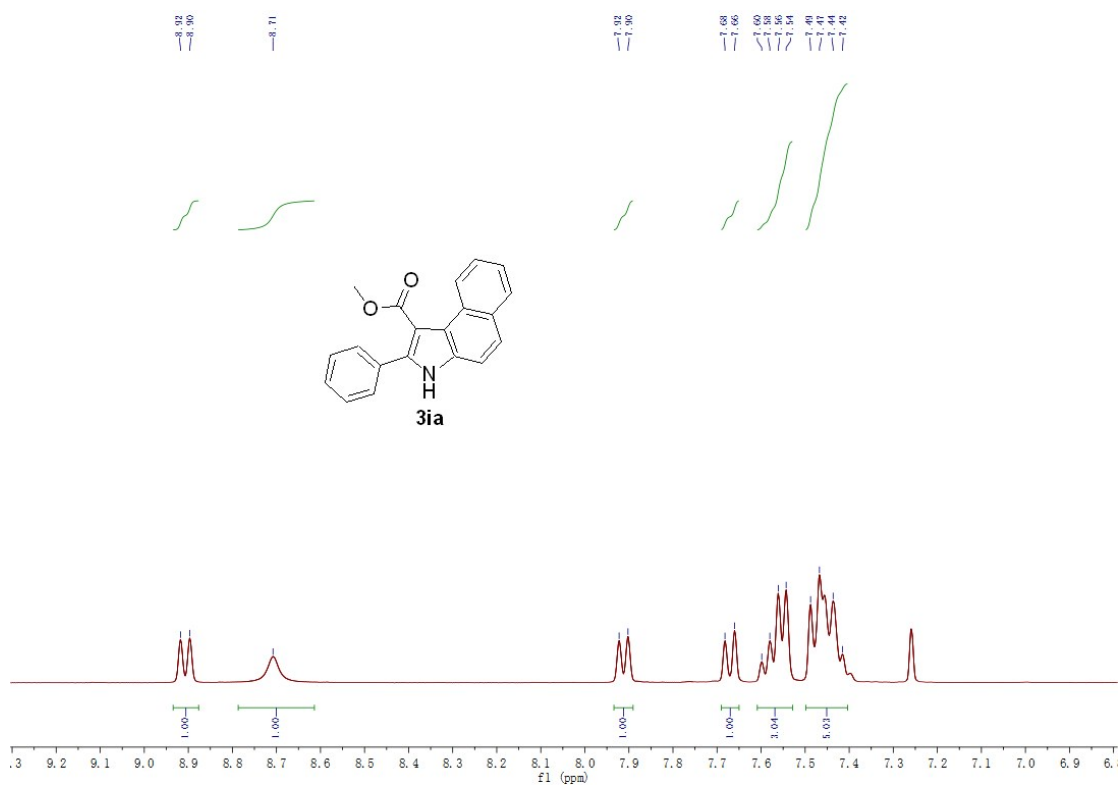



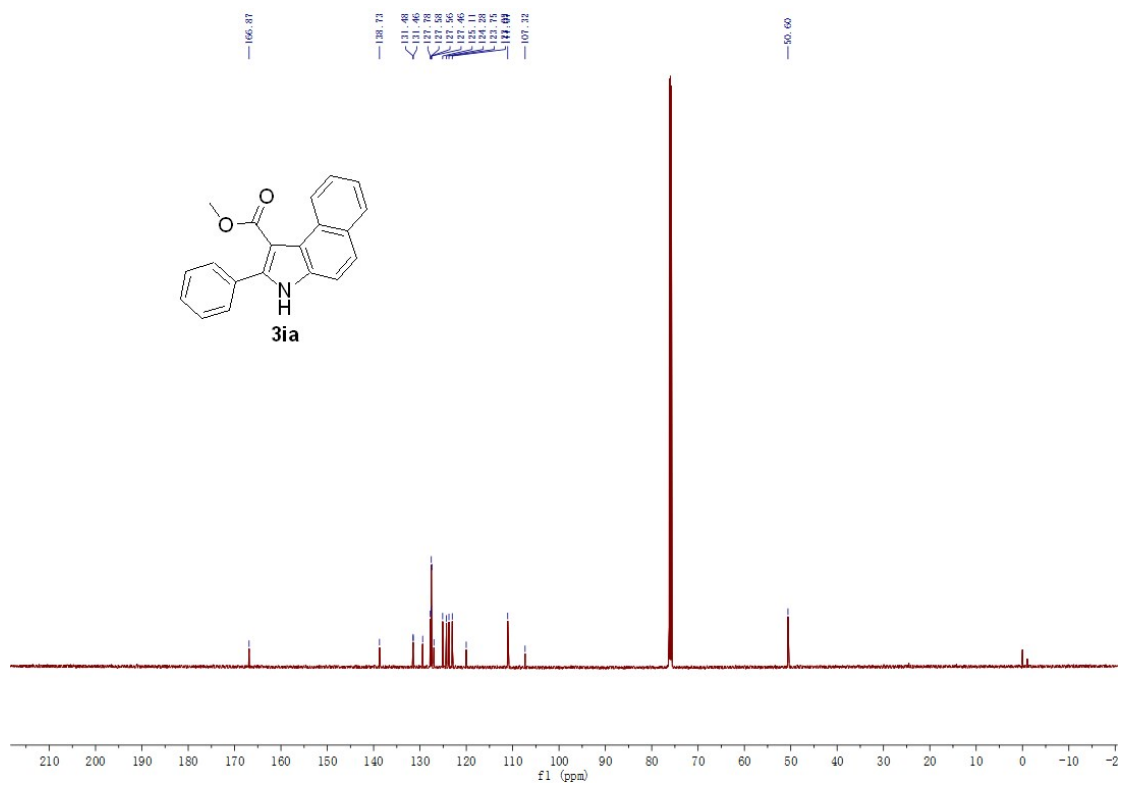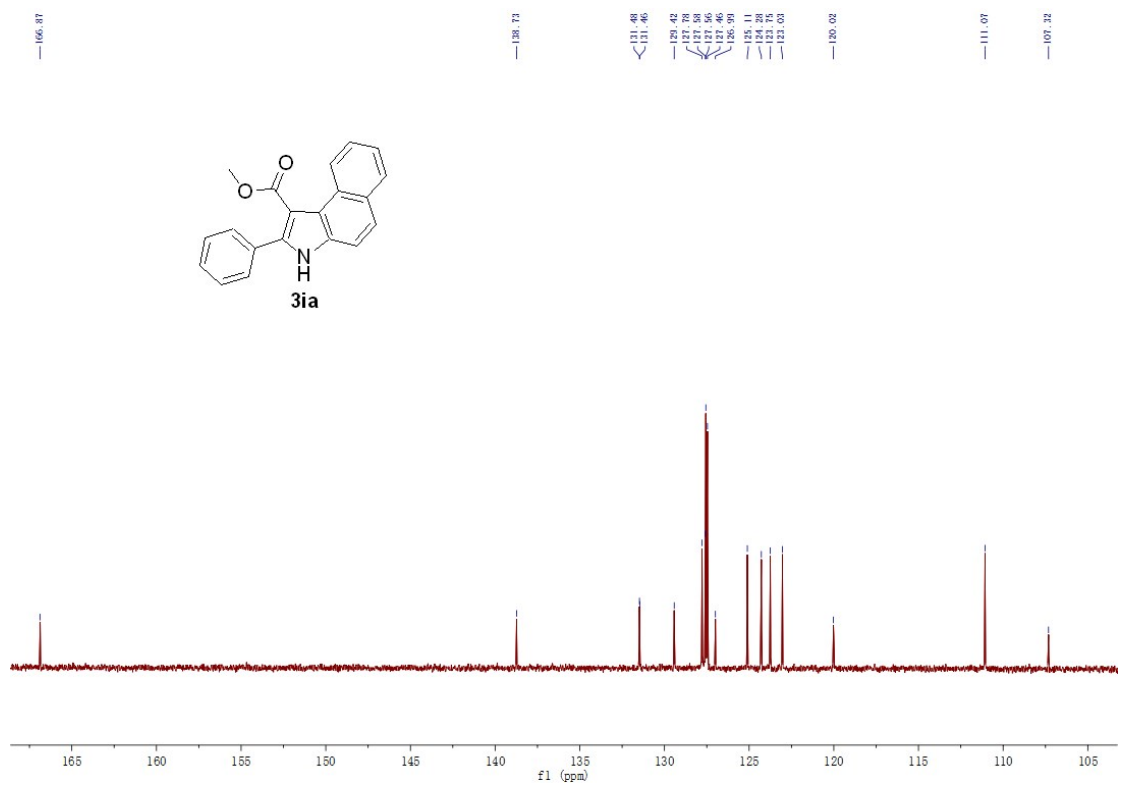

Mixture of methyl 6-methyl-2-phenyl-1*H*-indole-3-carboxylate (**3ja**) and methyl 4-methyl-2-phenyl-1*H*-indole-3-carboxylate (**3j'a**)

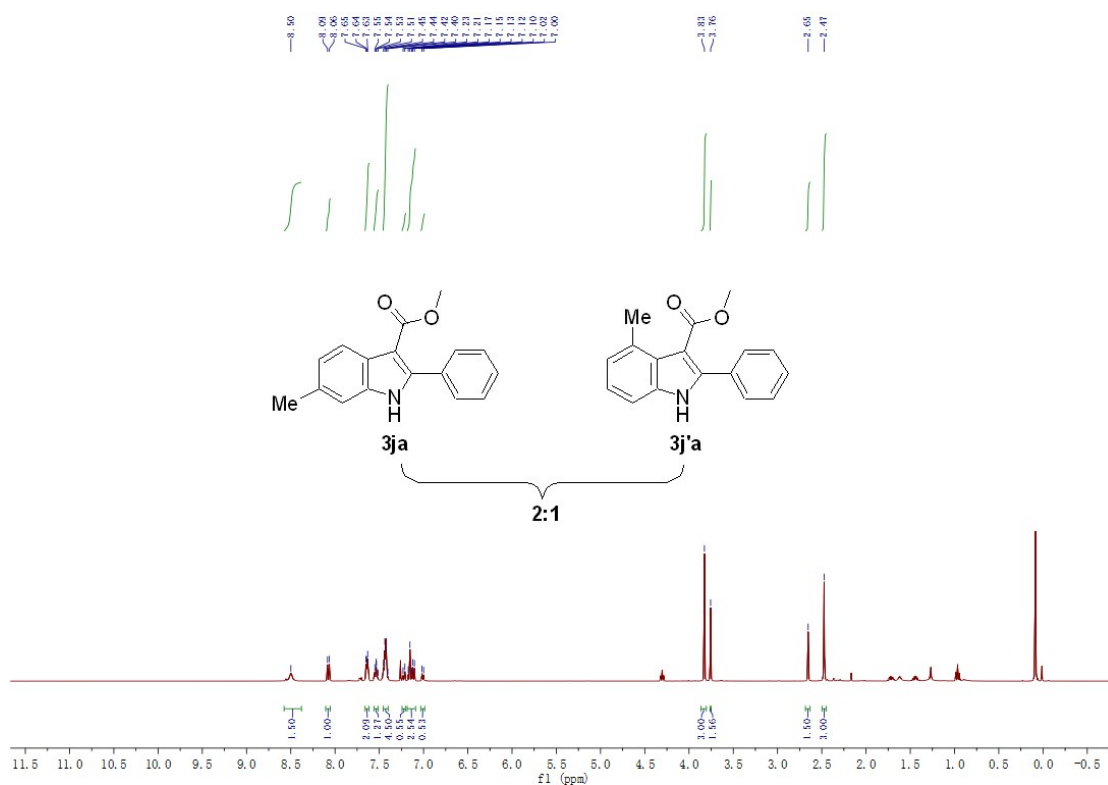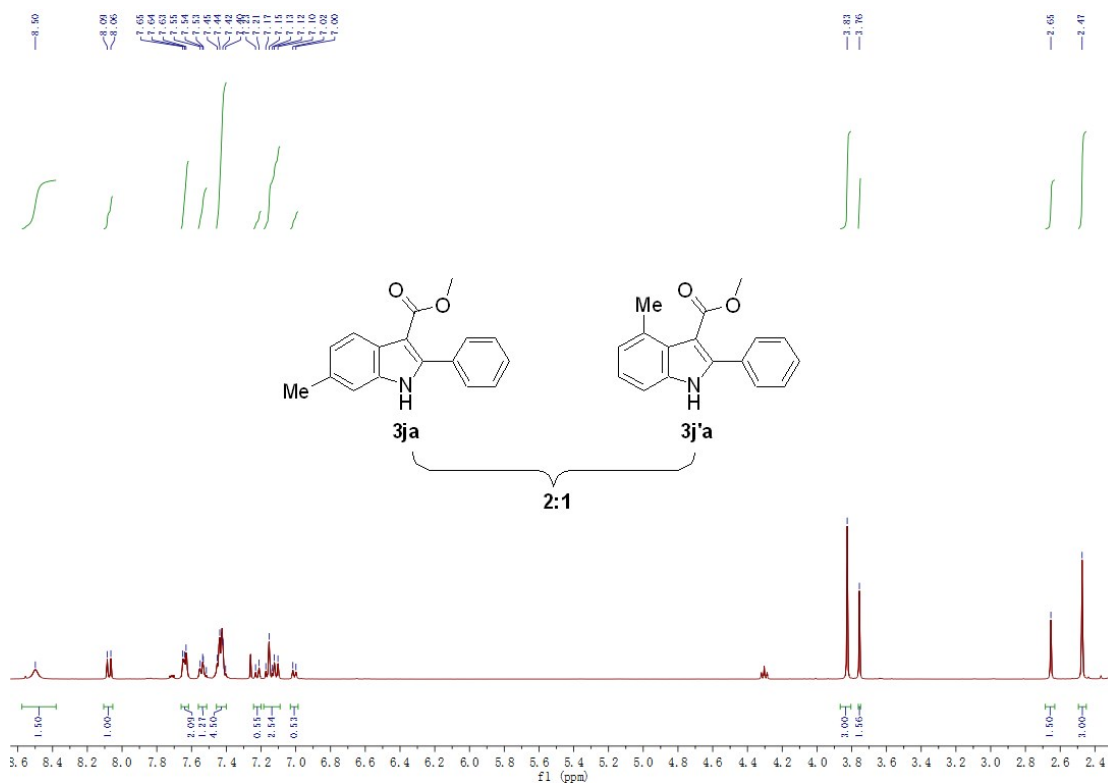

## 2. High-resolution mass spectra of new compounds

### Methyl 5-chloro-2-(4-chlorophenyl)-1*H*-indole-3-carboxylate (3ab)

8\_180118122621 #8 RT: 0.10 AV: 1 NL: 8.83E5  
T: FTMS + p ESI Full ms [150.00-2000.00]

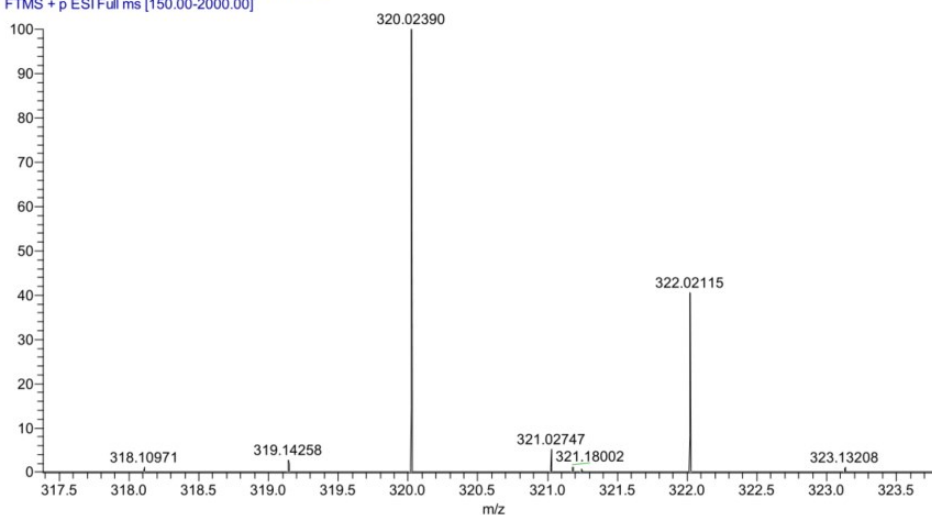

### Ethyl 5-chloro-2-(4-fluorophenyl)-1*H*-indole-3-carboxylate (3ac)

9 #11 RT: 0.14 AV: 1 NL: 5.75E6  
T: FTMS + p ESI Full ms [150.00-2000.00]

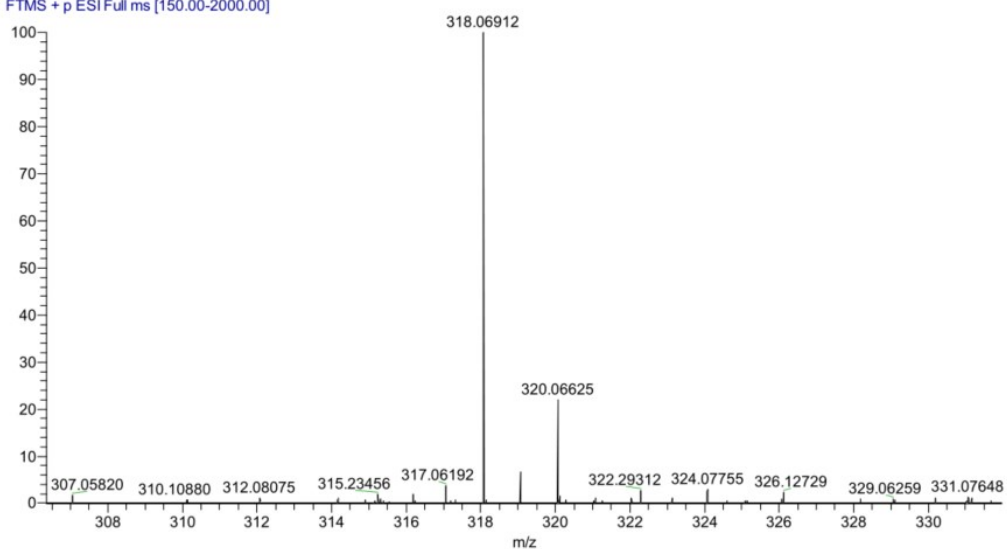

### Methyl 2-(4-bromophenyl)-5-methyl-1*H*-indole-3-carboxylate (3ad)

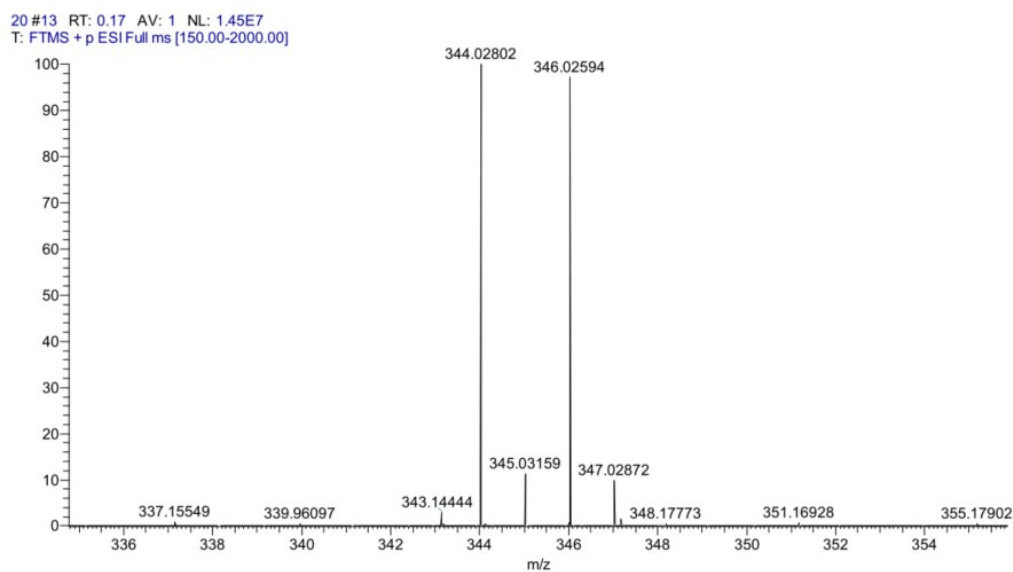

### Ethyl 5-methyl-2-(*p*-tolyl)-1*H*-indole-3-carboxylate (3ae)

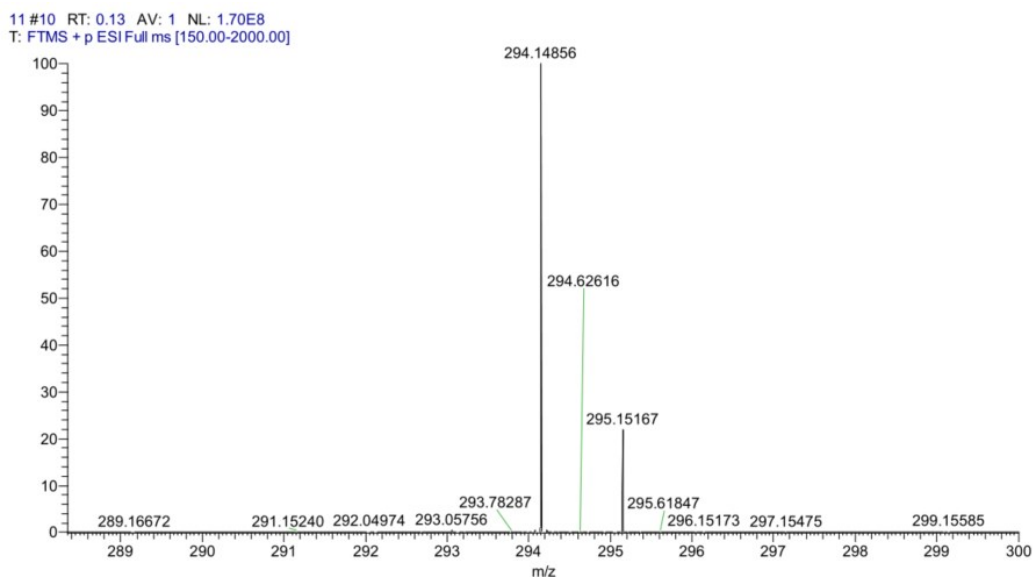

### Methyl 2-(4-methoxyphenyl)-5-methyl-1*H*-indole-3-carboxylate (3af)

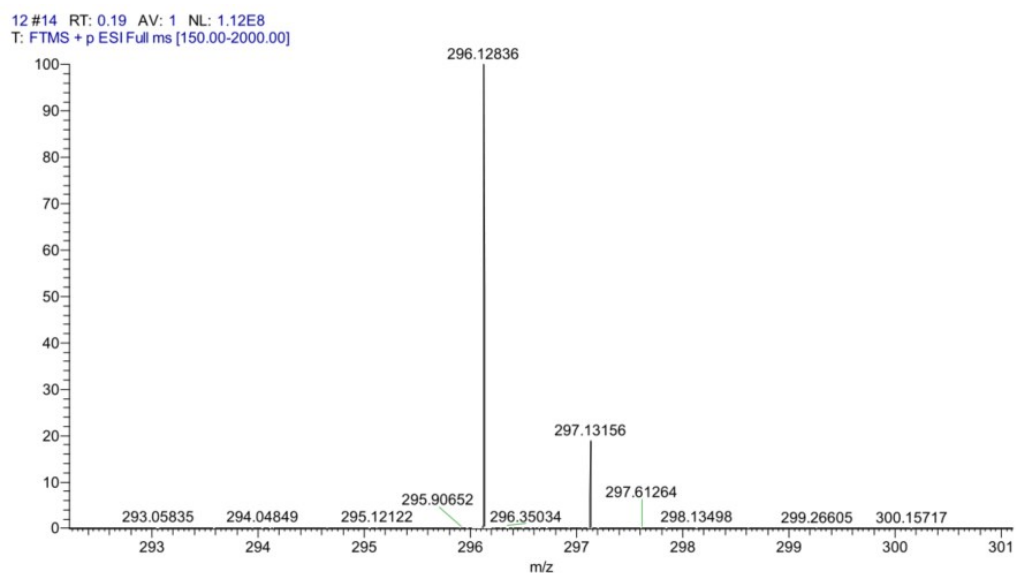

### Methyl 5-methoxy-2-(4-methoxyphenyl)-1*H*-indole-3-carboxylate (3ag)

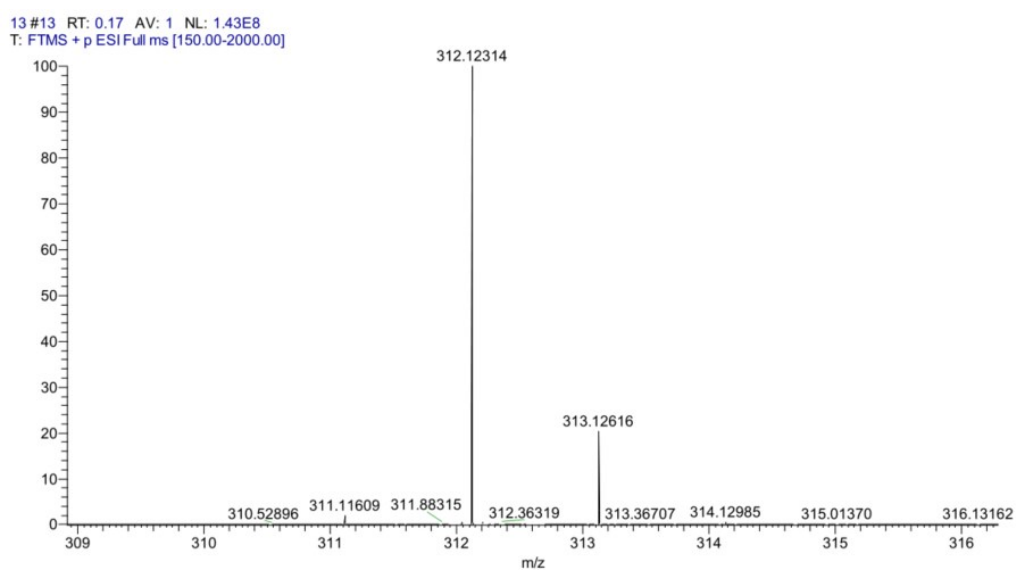

## Methyl 2-[4-(tert-butyl) phenyl]-5-methyl-1H-indole-3-carboxylate (3ah)

19 #13 RT: 0.17 AV: 1 NL: 1.05E8  
T: FTMS + p ESI Full ms [150.00-2000.00]

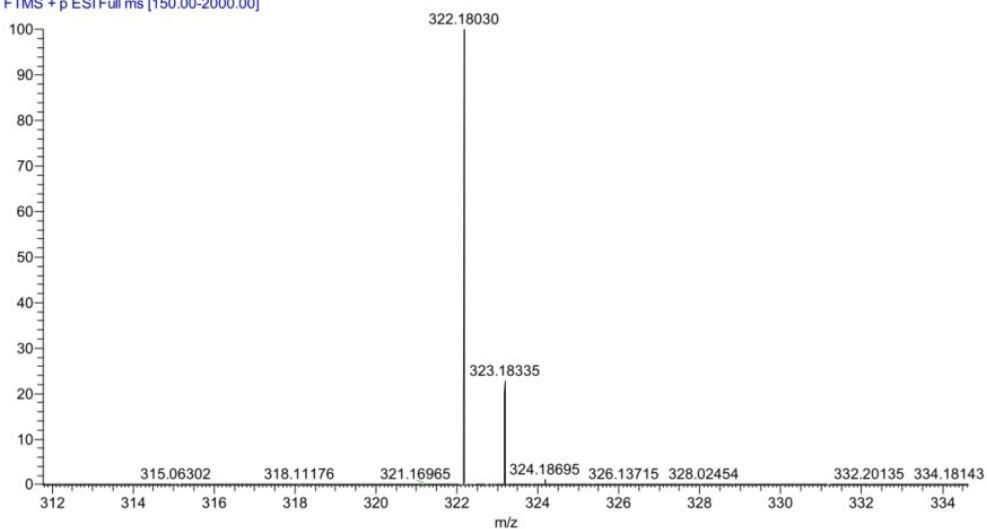

## . Methyl 2-(4-ethoxyphenyl)-5-methyl-1H-indole-3-carboxylate (3ai)

21 #13 RT: 0.17 AV: 1 NL: 9.82E7  
T: FTMS + p ESI Full ms [150.00-2000.00]

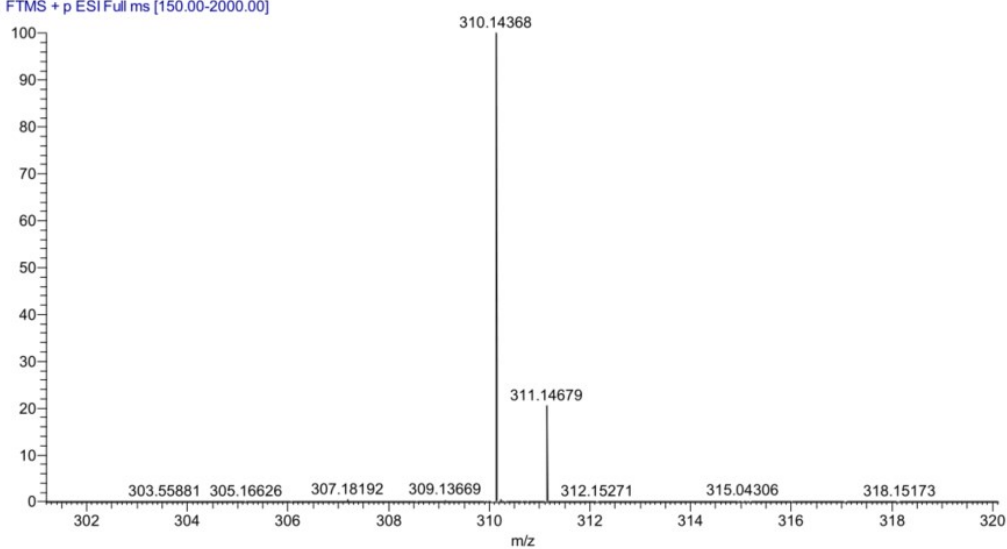

### Methyl 5-methyl-2-[4-(trifluoromethyl)phenyl]-1H-indole-3-carboxylate (3aj)

22 #7 RT: 0.08 AV: 1 NL: 3.26E7  
T: FTMS + p ESI Full ms [150.00-2000.00]

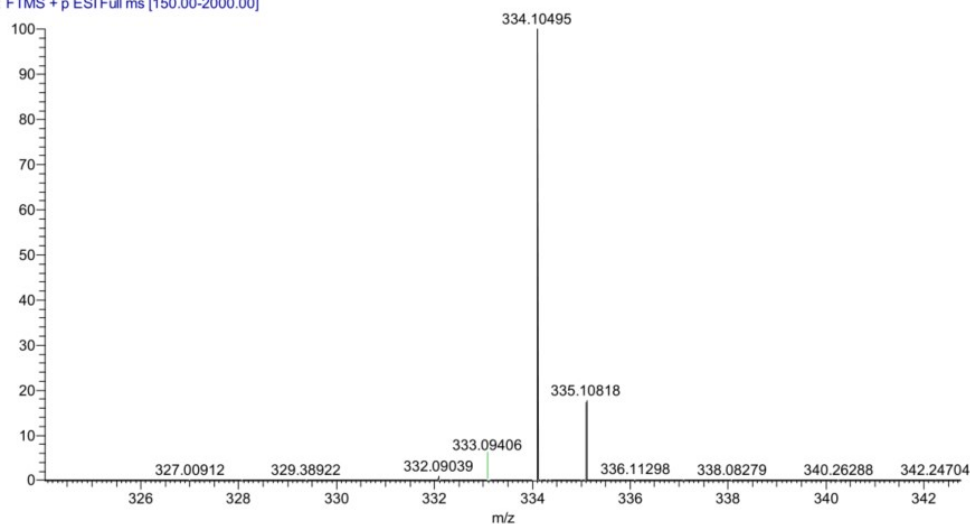

### Methyl 2-(3-fluorophenyl)-5-methyl-1H-indole-3-carboxylate (3ak)

18 #17 RT: 0.23 AV: 1 NL: 2.13E7  
T: FTMS + p ESI Full ms [150.00-2000.00]

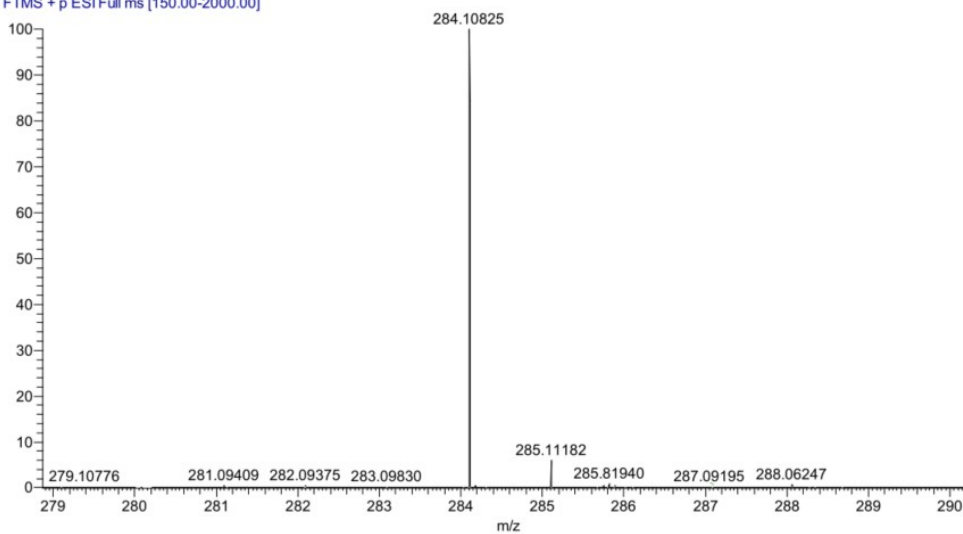

### Methyl 2-(3-chlorophenyl)-5-methyl-1*H*-indole-3-carboxylate (3aI)

17 #14 RT: 0.18 AV: 1 NL: 1.39E7  
T: FTMS + p ESI Full ms [150.00-2000.00]

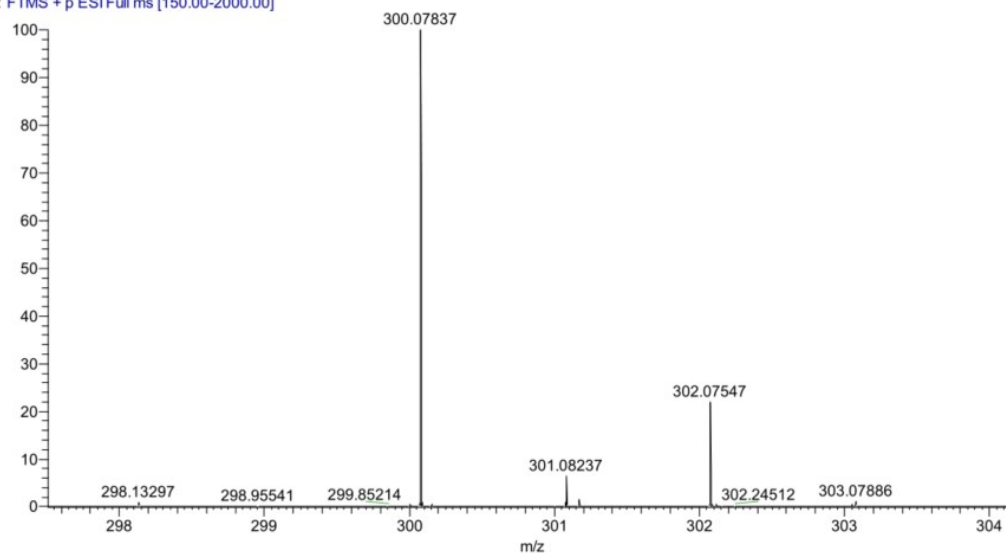

### Methyl 5-methyl-2-(*m*-tolyl)-1*H*-indole-3-carboxylate (3aM)

14\_180118151210 #32 RT: 0.48 AV: 1 NL: 2.08E7  
T: FTMS + p ESI Full ms [150.00-2000.00]

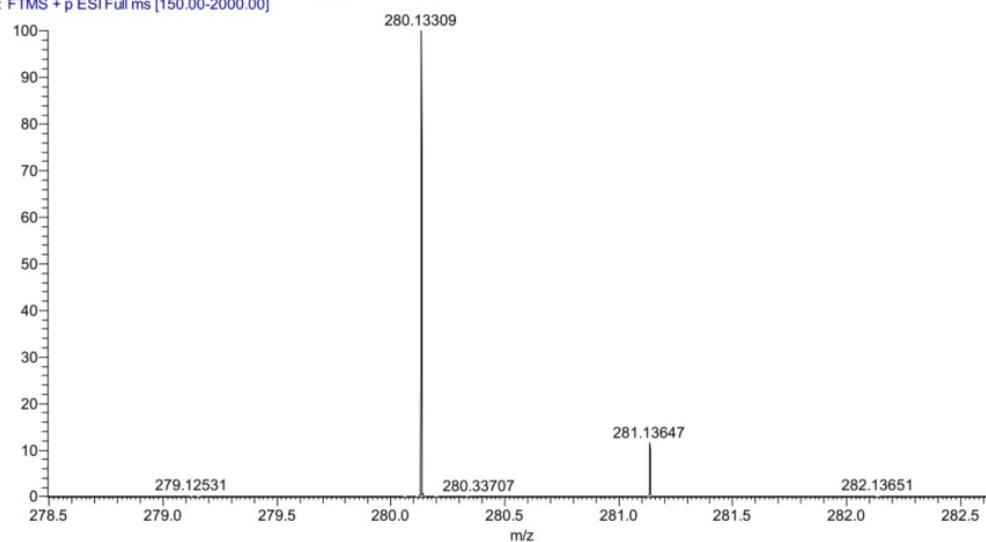



**Methyl 5-methoxy-2-(*m*-tolyl)-1*H*-indole-3-carboxylate (3an)**

15 #25 RT: 0.37 AV: 1 NL: 1.86E8  
T: FTMS + p ESI Full ms [150.00-2000.00]

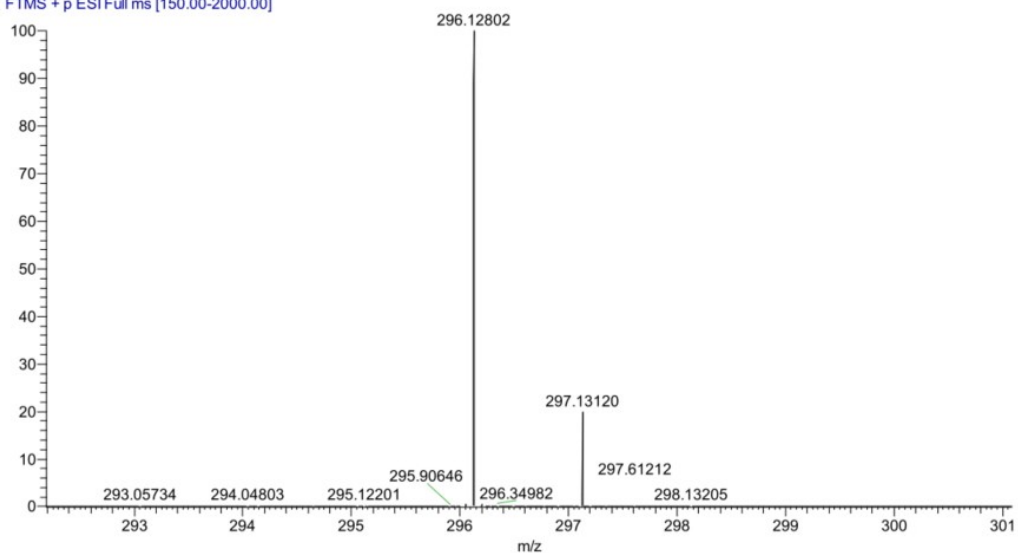

**Methyl 2-(3-methoxyphenyl)-5-methyl-1*H*-indole-3-carboxylate (3ao)**

16 #14 RT: 0.19 AV: 1 NL: 1.24E7  
T: FTMS + p ESI Full ms [150.00-2000.00]

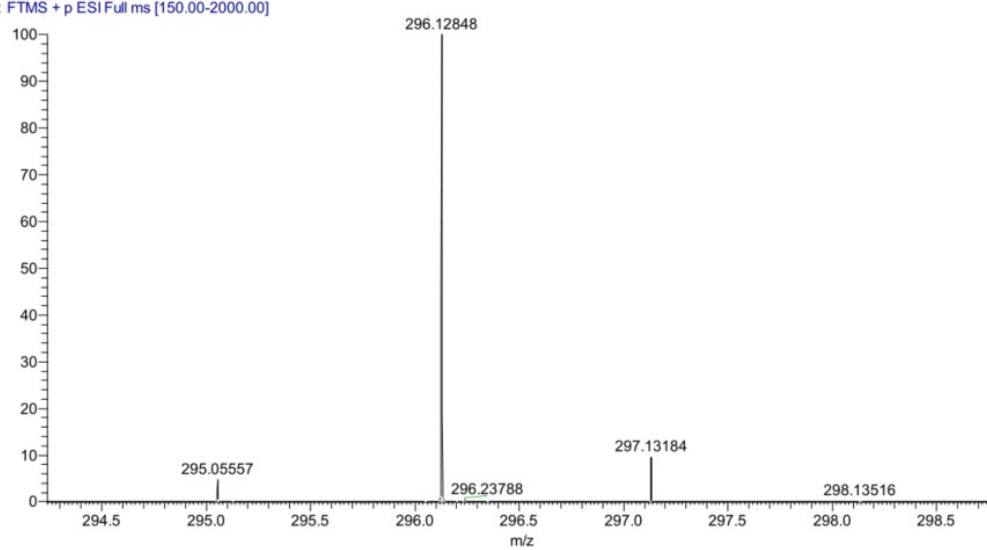

### Methyl 5-fluoro-2-phenyl-1*H*-indole-3-carboxylate (3da)

23 #11 RT: 0.14 AV: 1 NL: 2.60E7  
T: FTMS + p ESI Full ms [150.00-2000.00]

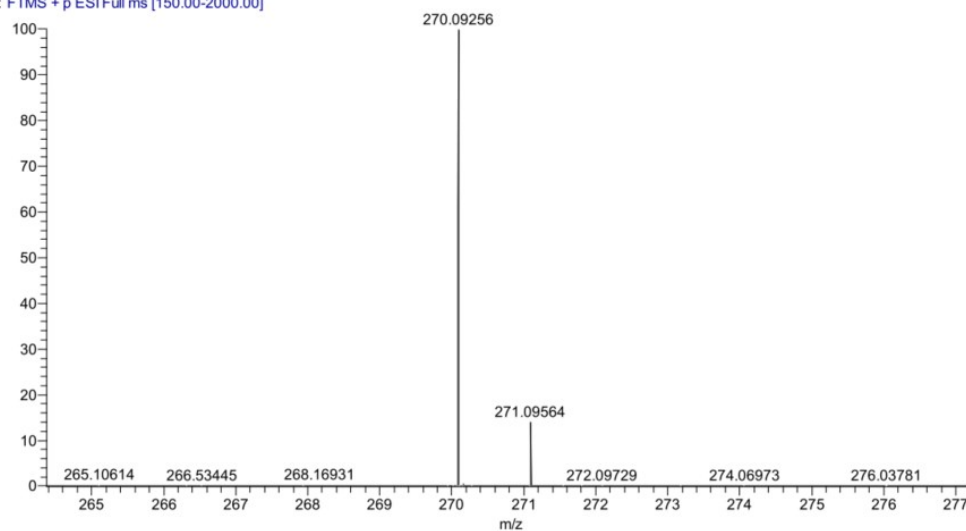

### Ethyl 5-chloro-2-(*p*-tolyl)-1*H*-indole-3-carboxylate (3ea)

10 #11 RT: 0.14 AV: 1 NL: 6.74E7  
T: FTMS + p ESI Full ms [150.00-2000.00]

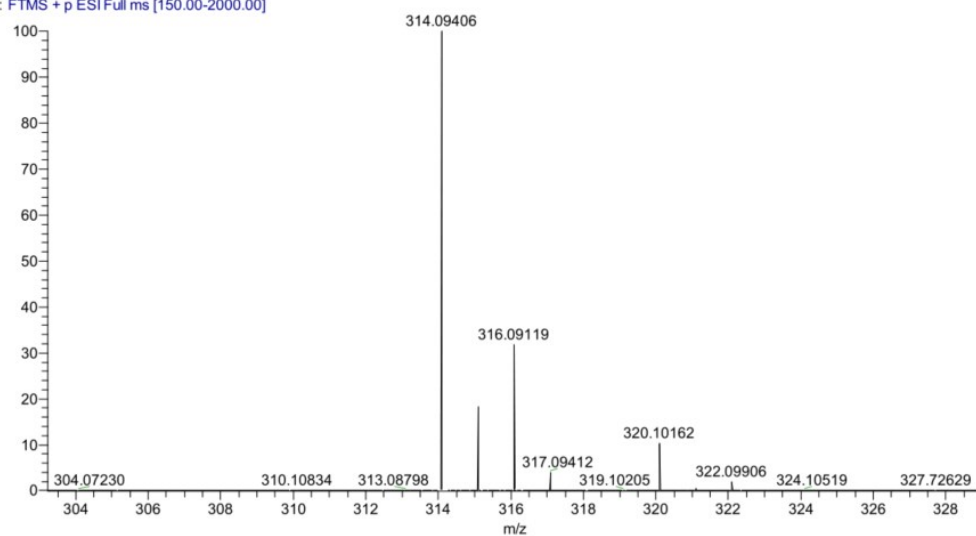

### Dimethyl 2-phenyl-1*H*-indole-3,5-dicarboxylate (3fa)

27 #13 RT: 0.17 AV: 1 NL: 1.19E8  
T: FTMS + p ESI Full ms [150.00-2000.00]

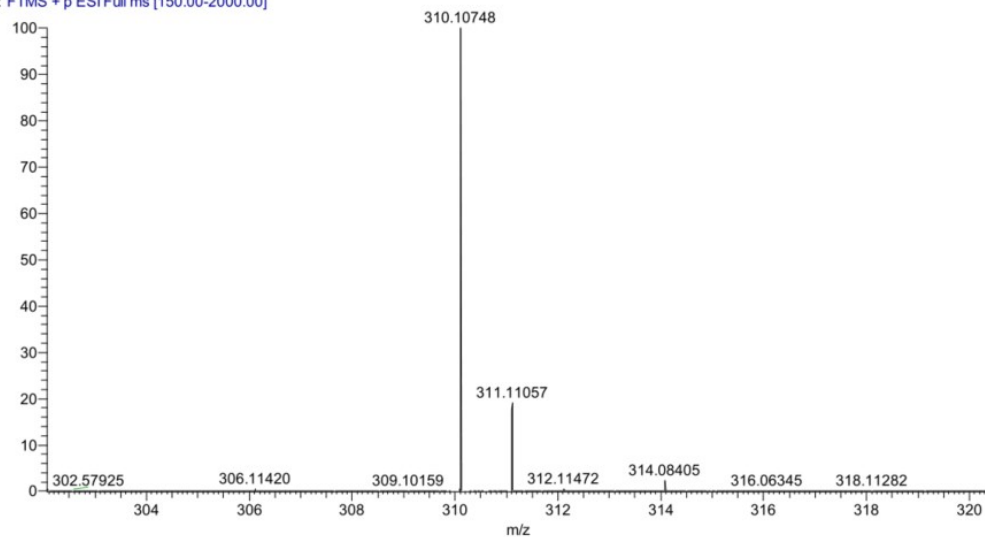

### Methyl 5-(methylthio)-2-phenyl-1*H*-indole-3-carboxylate (3ga)

25 #18 RT: 0.26 AV: 1 NL: 9.70E6  
T: FTMS + p ESI Full ms [150.00-2000.00]

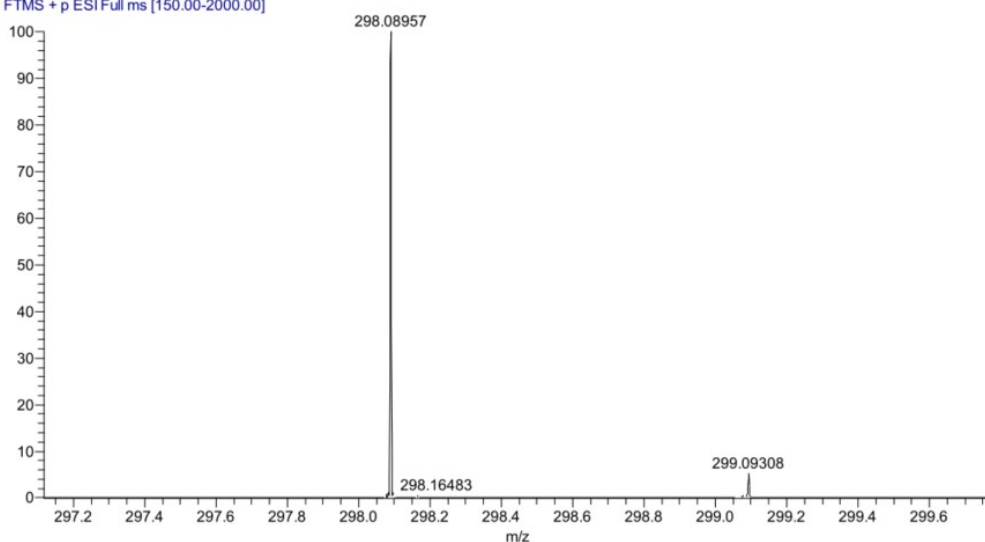

### Methyl 2-phenyl-1*H*-benzo[*g*]indole-3-carboxylate (3ha)

26 #23 RT: 0.31 AV: 1 NL: 3.21E7  
T: FTMS + p ESI Full ms [150.00-2000.00]

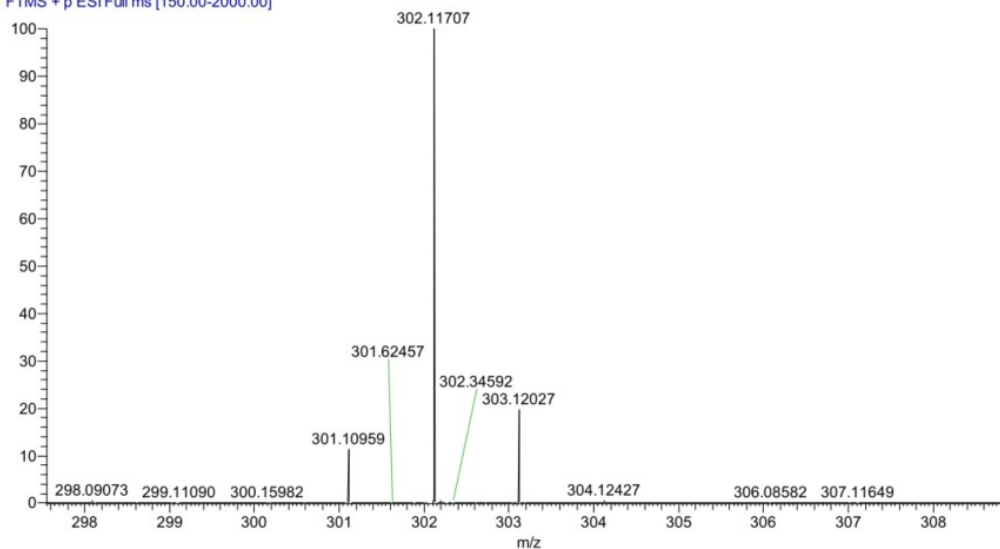

### Methyl 2-phenyl-3*H*-benzo[*e*]indole-1-carboxylate (3ia)

24 #8 RT: 0.10 AV: 1 NL: 4.47E7  
T: FTMS + p ESI Full ms [150.00-2000.00]

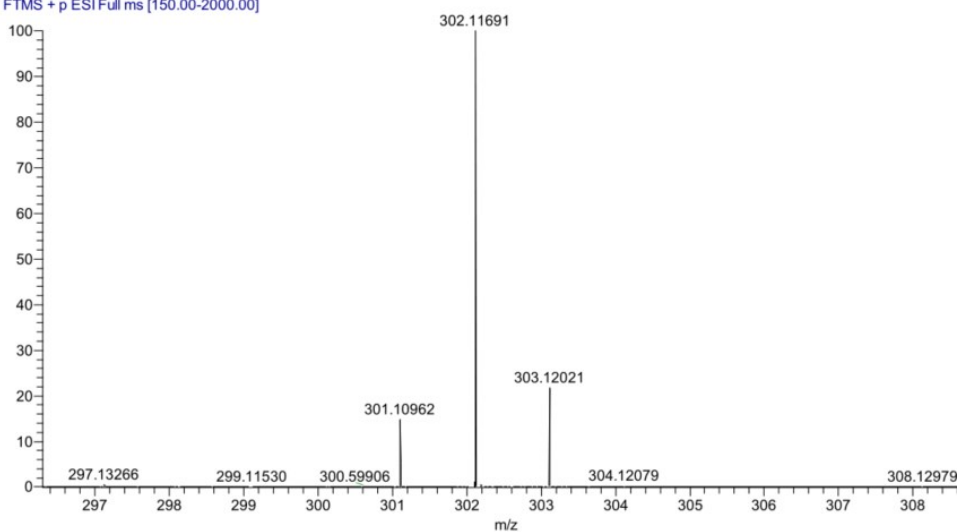

### 3. IR spectra of new compounds

#### IR spectra of 3ab

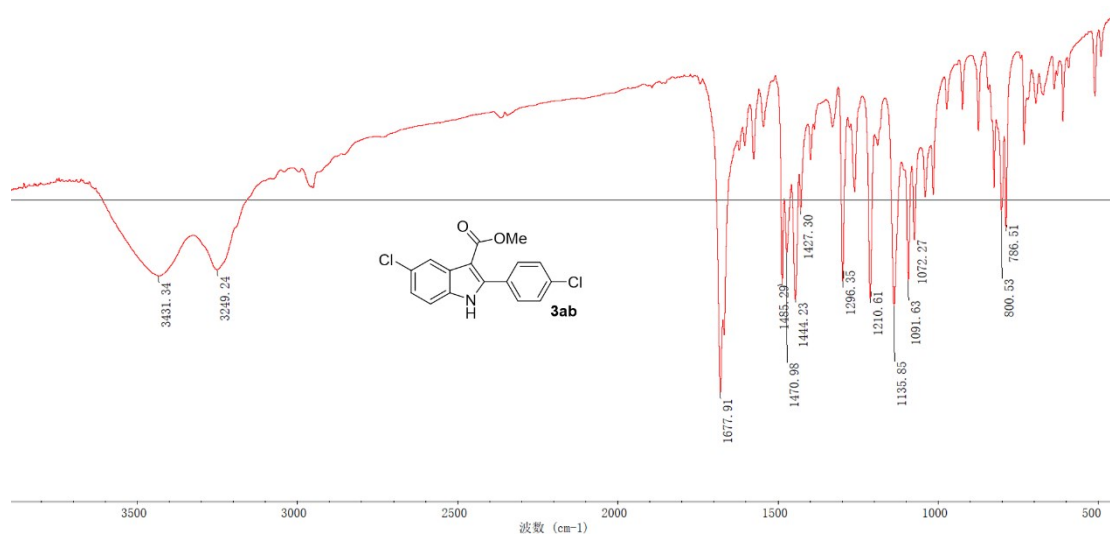

#### IR spectra of 3ac

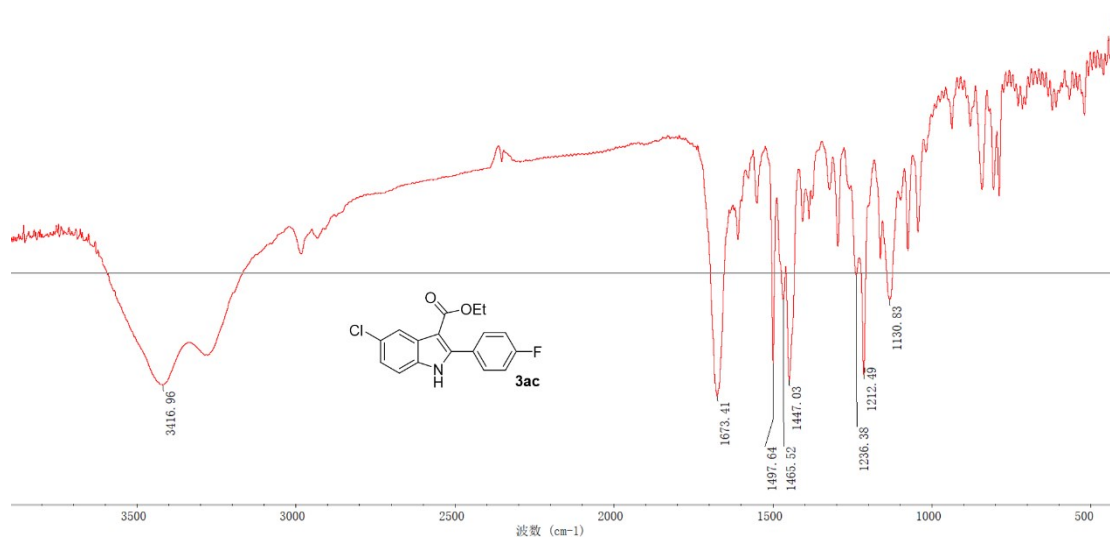

### IR spectra of 3ad

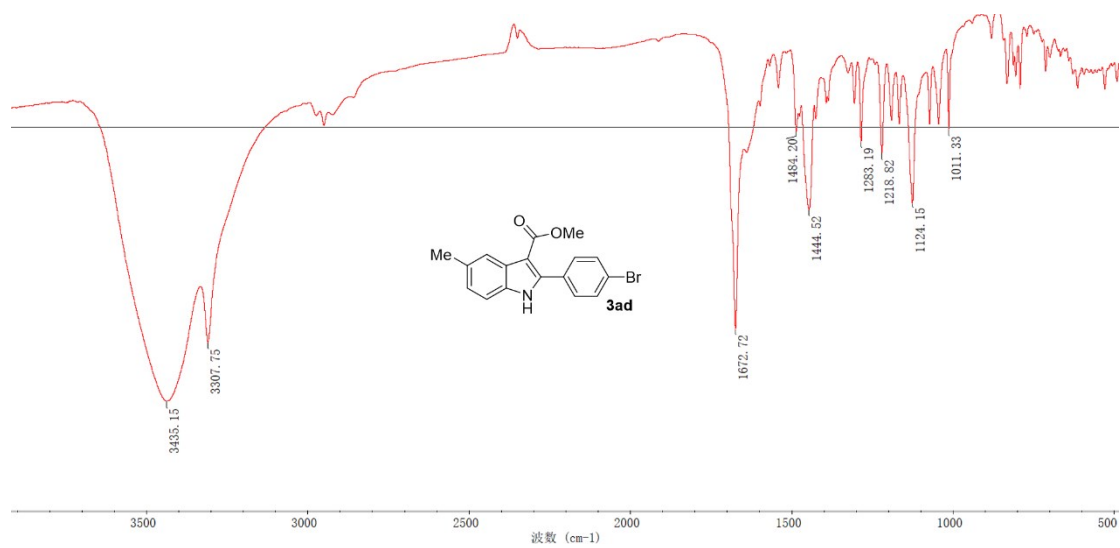

### IR spectra of 3ae

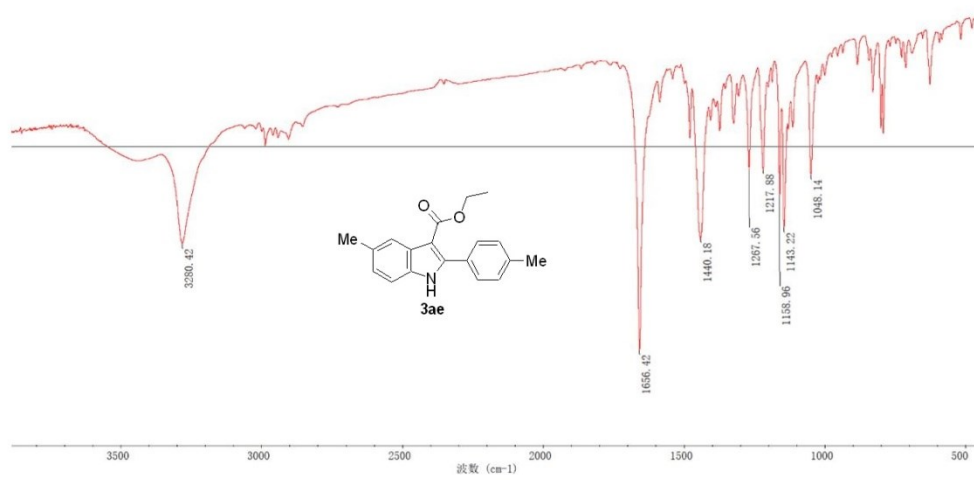

## IR spectra of 3af

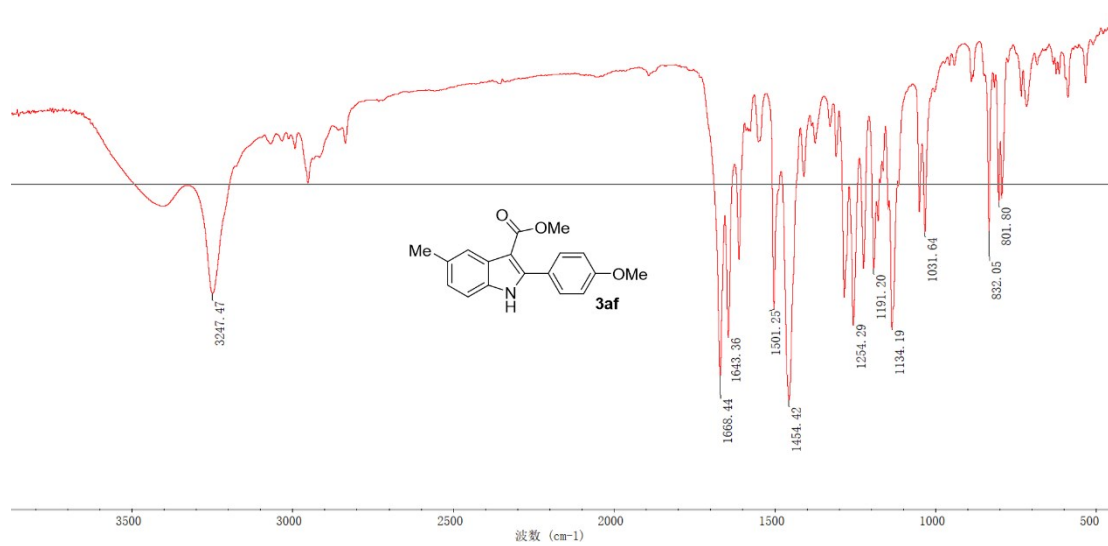

## IR spectra of 3ag

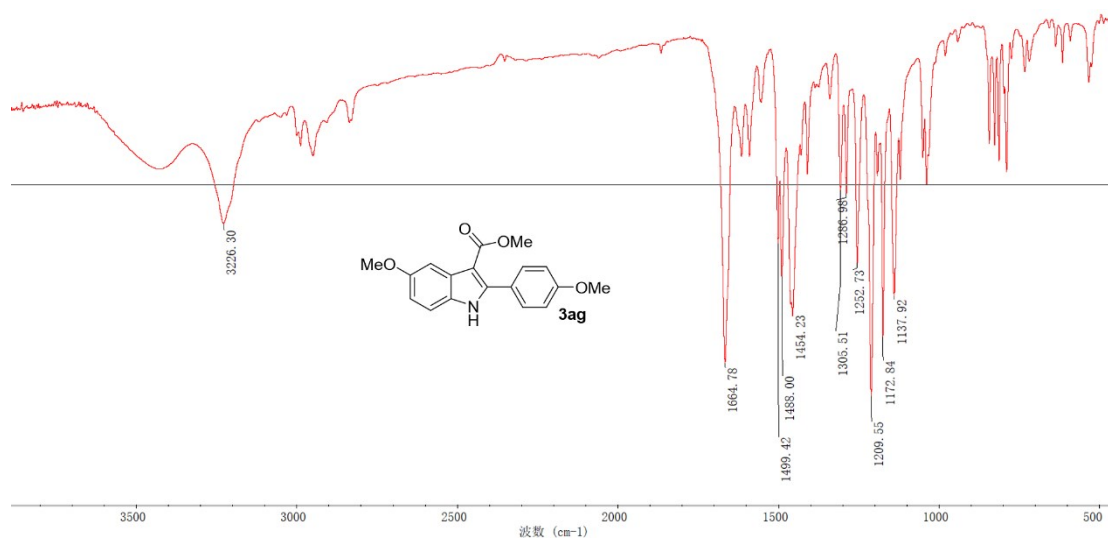

## IR spectra of 3ah

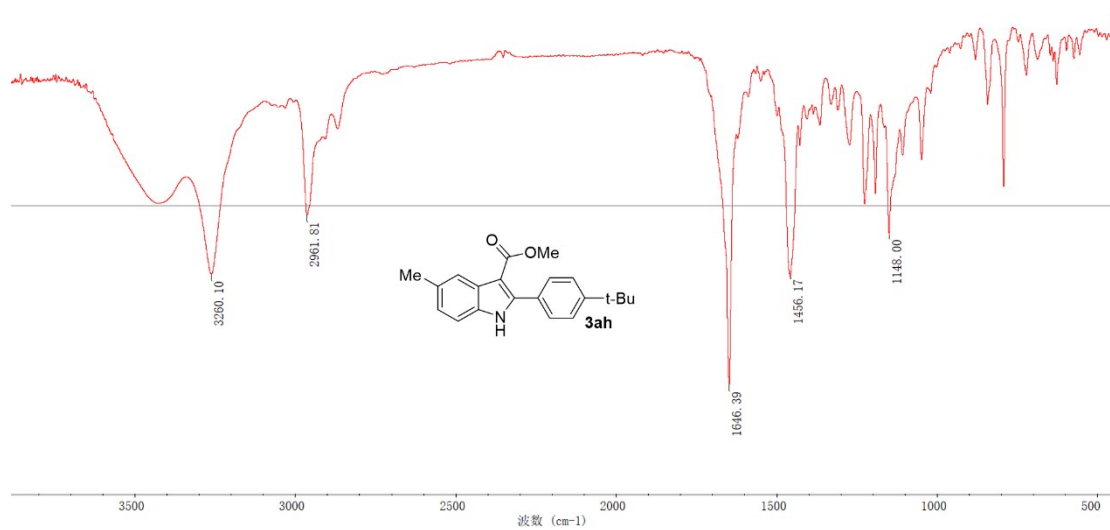

## IR spectra of 3ai

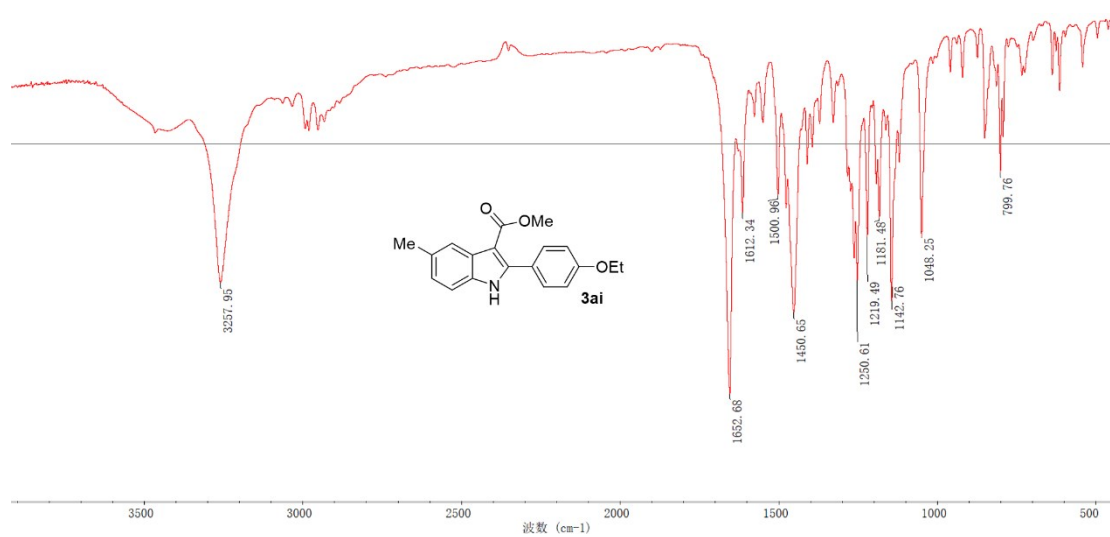



## IR spectra of 3aj

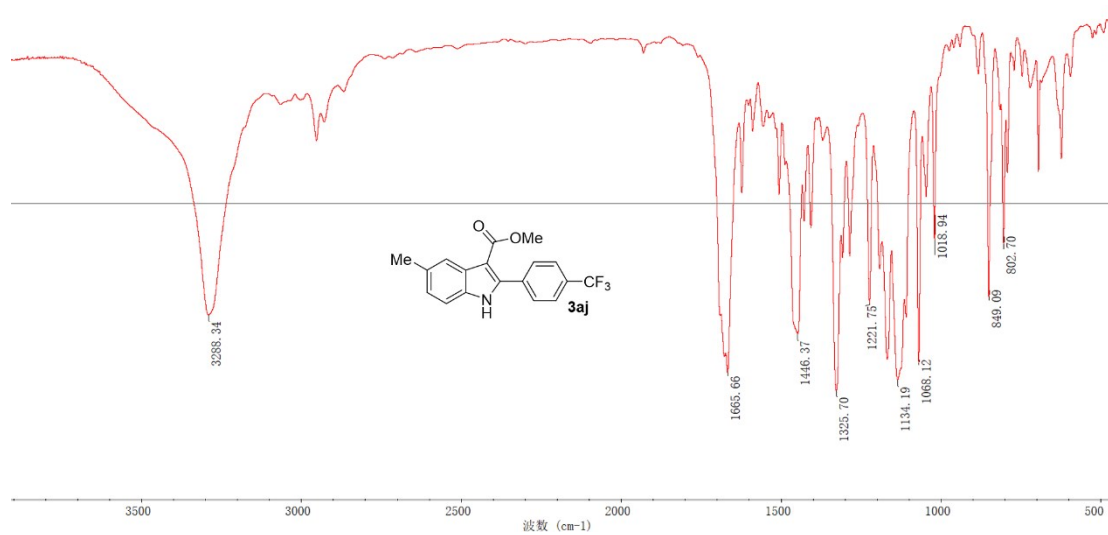

## IR spectra of 3ak

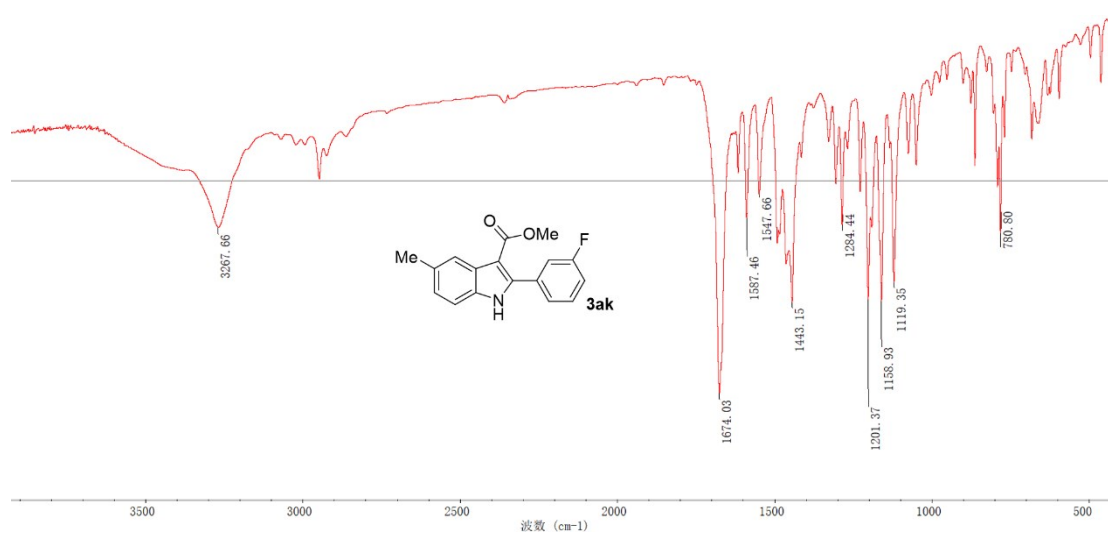

## IR spectra of 3al

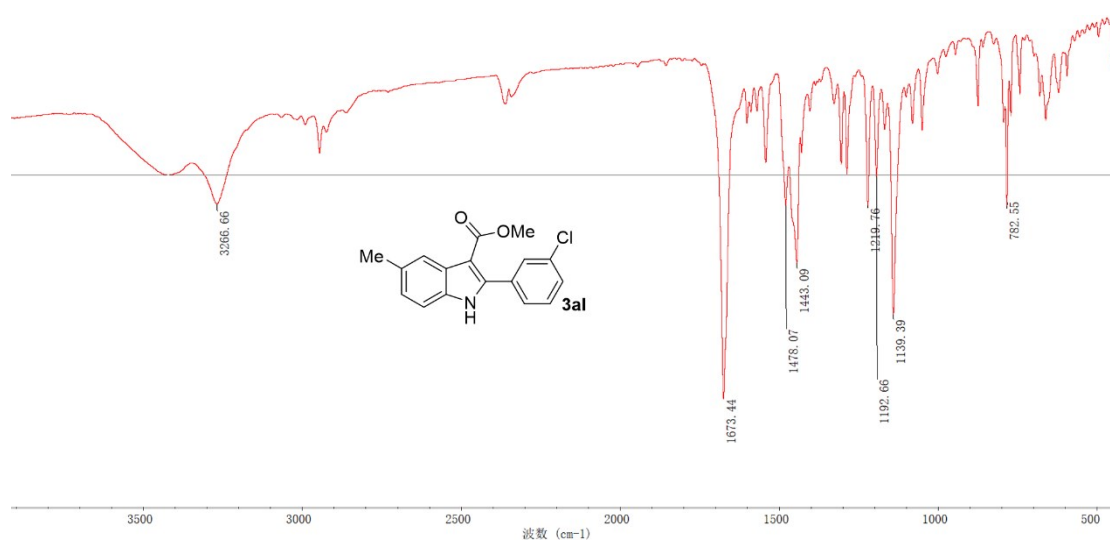

## IR spectra of 3am

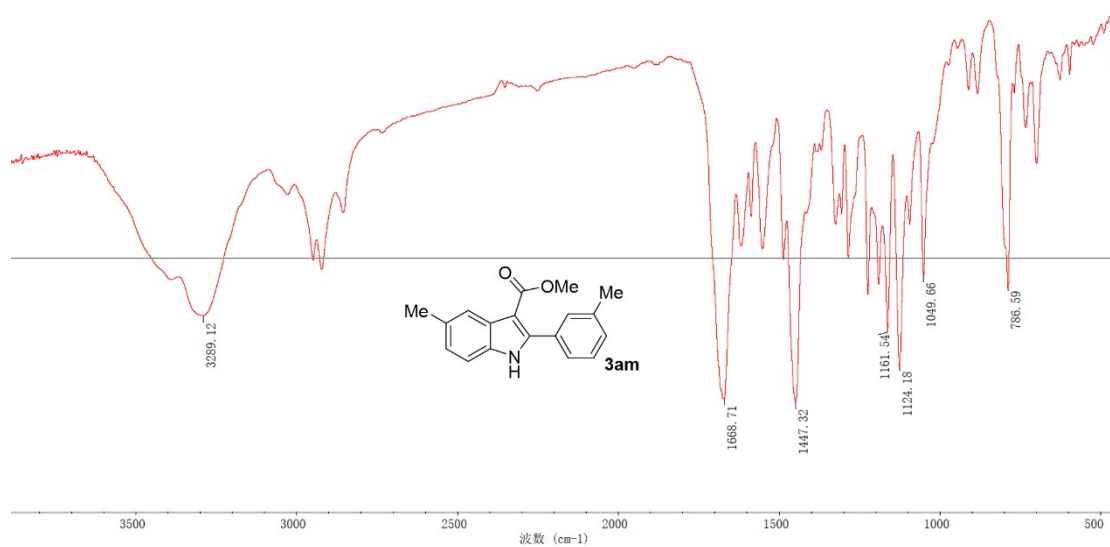

## IR spectra of 3an

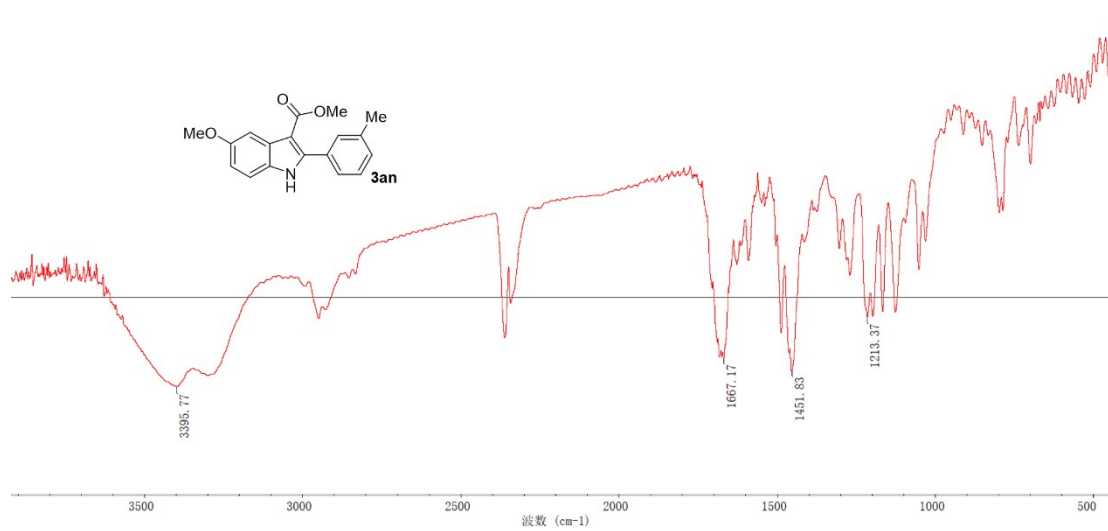

## IR spectra of 3ao

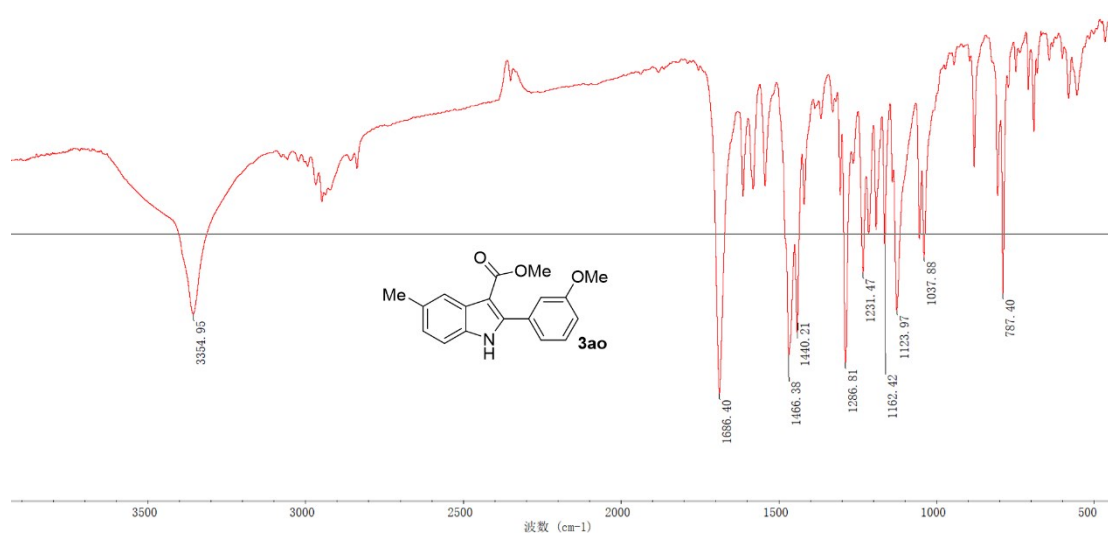

### IR spectra of 3da

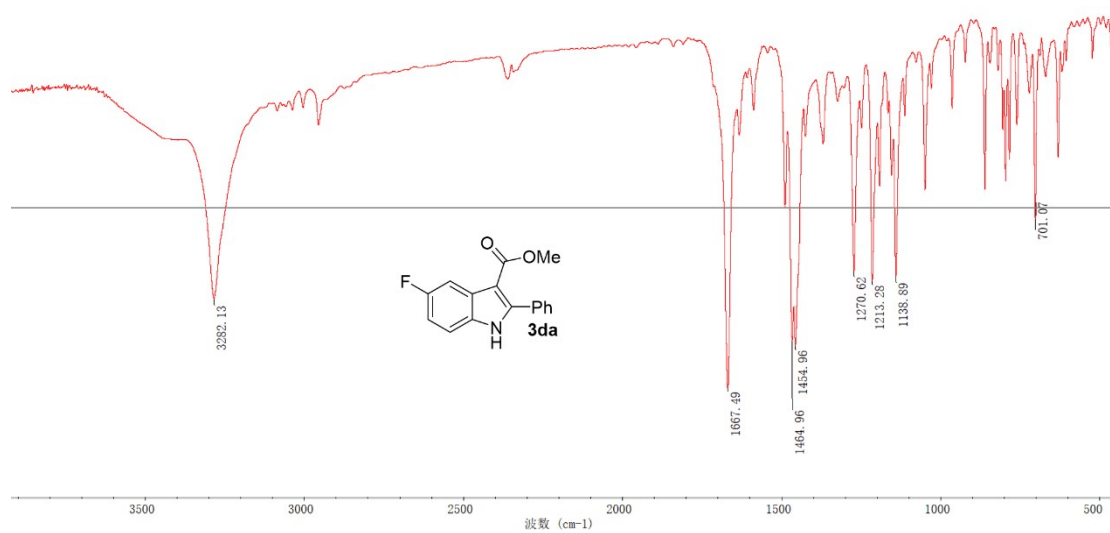

### IR spectra of 3ea

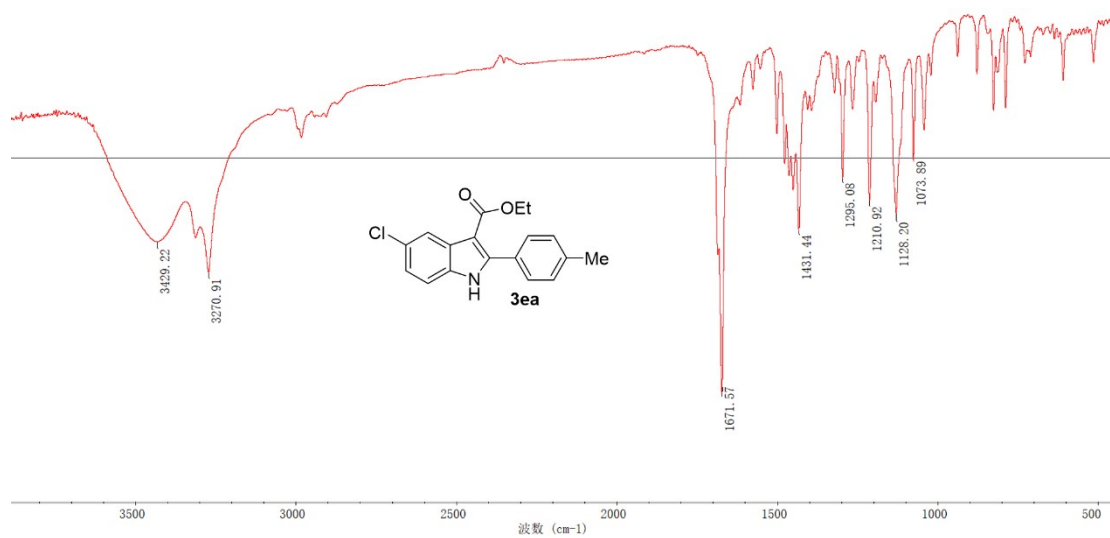

### IR spectra of 3fa

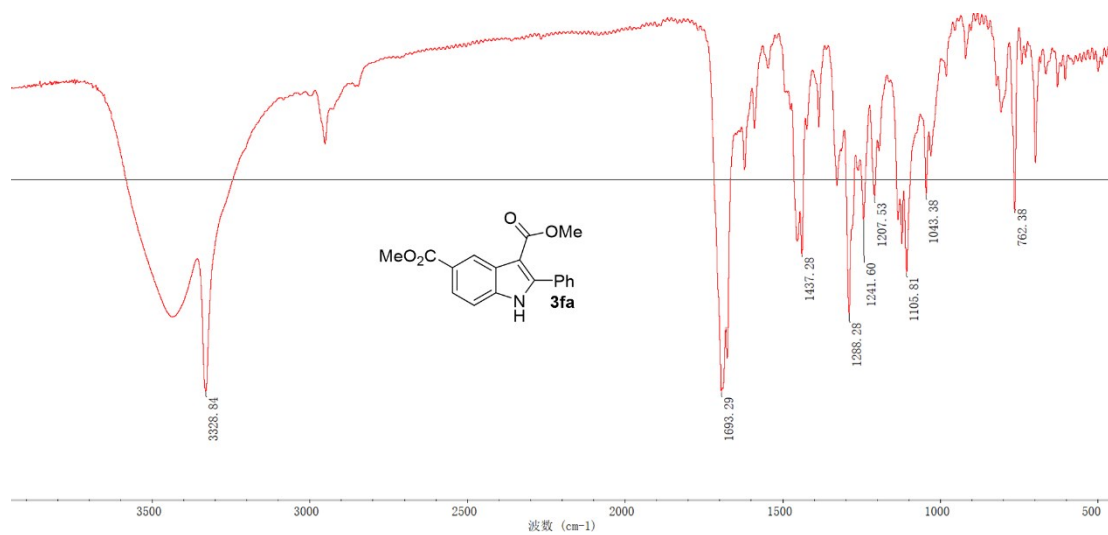

### IR spectra of 3ga

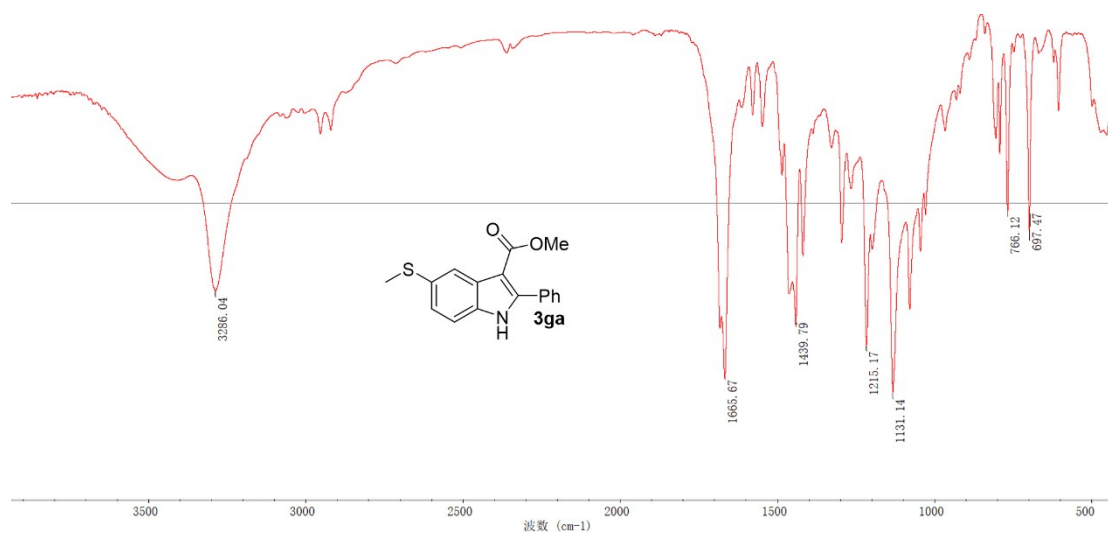

### IR spectra of 3ha

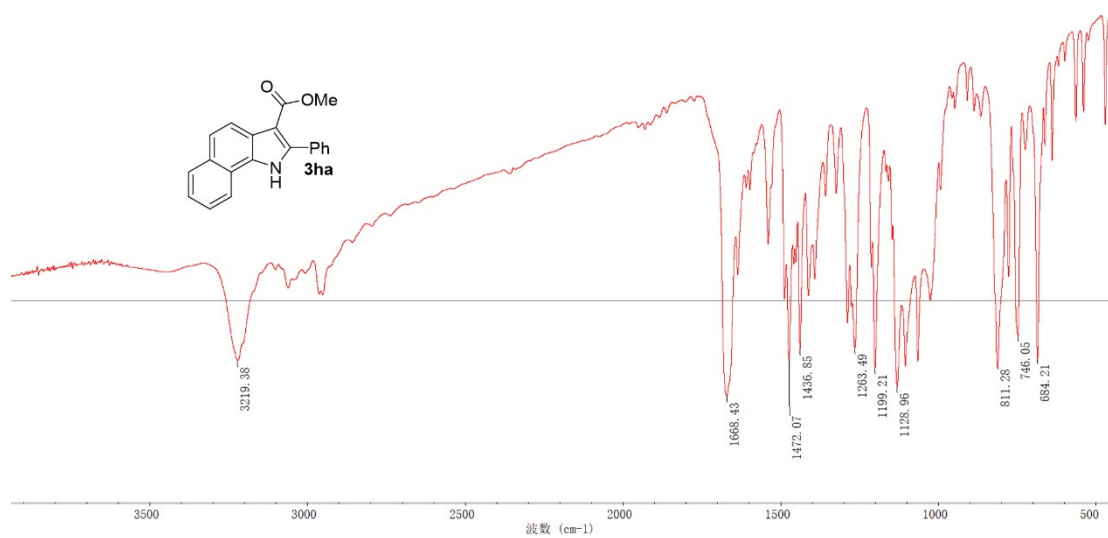

### IR spectra of 3ia

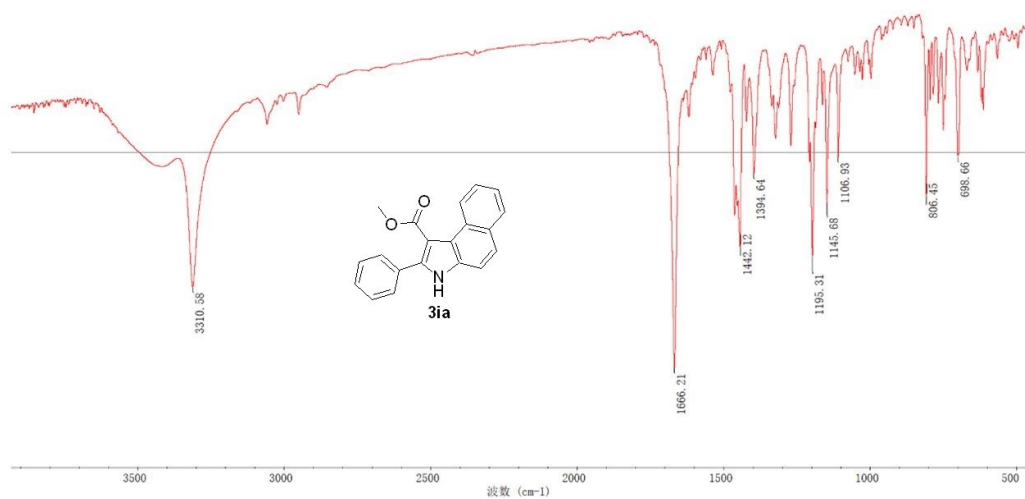

Supplement: d0ra04592f1.pdf [file d0ra04592f1.pdf]
